# Supplementary material
Source: publisher figshare collection journal article supplement (https://future-science-group.figshare.com/ndownloader/files/31485731)
Supplement: Supplementary file 1 [file 31485731]

## Sheet: Sheet1
SRA database Differential expression analysis results using DESeq2
geneID	gene	baseMean	log2FoldChange	lfcSE	stat	pvalue	padj	Gene	FoldChange
ENSG00000160180	TFF3	10305.1	-3.31757	0.75983	-4.36619	1.26431e-05	5.20123e-05	TFF3	9.97
ENSG00000205038	PKHD1L1	7377.71	-2.93569	0.792387	-3.70487	0.0002115	0.000646916	PKHD1L1	7.65
ENSG00000145864	GABRB2	3962.02	6.95656	0.855509	8.13148	4.24066e-16	2.79341e-14	GABRB2	124.203
ENSG00000176532	PRR15	3789.5	4.91981	0.788753	6.23745	4.44748e-10	5.74485e-09	PRR15	30.2698
ENSG00000134569	LRP4	11311.5	3.48188	0.62604	5.56175	2.67082e-08	2.16751e-07	LRP4	11.1725
ENSG00000009694	TENM1	7057.1	3.45137	0.712792	4.84204	1.28514e-06	6.77224e-06	TENM1	10.9387
ENSG00000237463	LRRC52-AS1	456.165	24.2733	1.35336	17.9355	6.22728e-72	2.85234e-67
ENSG00000275896	PRSS2	330.369	19.9917	1.41978	14.0808	4.98182e-45	1.14094e-40
ENSG00000125954	CHURC1-FNTB	77.9569	21.8134	1.56975	13.8961	6.68908e-44	1.02129e-39
ENSG00000204287	HLA-DRA	603.861	24.9914	1.8059	13.8387	1.48836e-43	1.70432e-39
ENSG00000167755	KLK6	110.417	20.2538	1.47721	13.7109	8.74141e-43	8.00783e-39
ENSG00000200320	SNORA63	5.65466	-6.50931	0.475433	-13.6913	1.14382e-42	8.73193e-39
ENSG00000155897	ADCY8	318.848	19.4688	1.45408	13.3891	7.00562e-41	4.58407e-37
ENSG00000204231	RXRB	129.808	22.8446	1.72595	13.2359	5.44122e-40	3.11537e-36
ENSG00000237580	GCSHP3	10.19	-5.26292	0.403104	-13.056	5.87569e-39	2.99034e-35
ENSG00000240395	RPL5P23	423.408	-3.63294	0.29002	-12.5265	5.34449e-36	2.44799e-32
ENSG00000260682	RN7SKP176	8.013	-5.01697	0.407264	-12.3187	7.18212e-35	2.99063e-31
ENSG00000226160		21.3721	-4.11164	0.338828	-12.1349	6.90201e-34	2.6345e-30
ENSG00000186743	TPI1P3	13.6111	-5.32936	0.439446	-12.1275	7.55554e-34	2.66211e-30
ENSG00000249624		70.0385	19.205	1.59406	12.0478	1.99138e-33	6.51524e-30
ENSG00000274978		17.8758	-7.88557	0.657885	-11.9863	4.19463e-33	1.28087e-29
ENSG00000225170		64.9203	-4.81709	0.402549	-11.9665	5.32446e-33	1.52426e-29
ENSG00000137745	MMP13	149.224	22.6187	1.90233	11.89	1.33403e-32	3.59434e-29
ENSG00000273570		10.1263	-5.67741	0.478993	-11.8528	2.08121e-32	5.29598e-29
ENSG00000257179	HMGN2P6	92.1835	-4.02328	0.340007	-11.8329	2.63786e-32	6.35919e-29
ENSG00000255072	PIGY	12.7186	-5.88308	0.500206	-11.7613	6.17725e-32	1.36979e-28
ENSG00000278802		11.5363	-7.03732	0.598416	-11.7599	6.28015e-32	1.36979e-28
ENSG00000279602		153.959	-5.89243	0.501553	-11.7484	7.20042e-32	1.49913e-28
ENSG00000234801	MORF4	183.924	-4.39869	0.37586	-11.703	1.2303e-31	2.45011e-28
ENSG00000281000	SNORD3D	62.0441	-5.96985	0.5108	-11.6873	1.48093e-31	2.82636e-28
ENSG00000248593	DSTNP2	532.543	-2.86936	0.245694	-11.6786	1.64019e-31	3.00509e-28
ENSG00000259032	ENSAP2	472.249	-3.08017	0.264825	-11.631	2.86796e-31	5.05246e-28
ENSG00000217648		117.083	-2.94864	0.253893	-11.6137	3.51143e-31	5.95695e-28
ENSG00000258656		6.91175	-4.63582	0.399805	-11.5952	4.35826e-31	7.1295e-28
ENSG00000218996	ARL4AP5	28.7381	-4.11849	0.357151	-11.5315	9.15224e-31	1.44555e-27
ENSG00000238650	SNORD54	3.68949	-5.59109	0.485324	-11.5203	1.04231e-30	1.5914e-27
ENSG00000112695	COX7A2	3993.58	-2.29295	0.1993	-11.505	1.2442e-30	1.83837e-27
ENSG00000240869	RN7SL128P	21.6487	-7.81967	0.685553	-11.4064	3.88589e-30	5.56216e-27
ENSG00000185561	TLCD2	105.012	22.6298	1.99008	11.3713	5.81296e-30	8.06839e-27
ENSG00000265185	SNORD3B-1	121.755	-5.94481	0.525738	-11.3076	1.20397e-29	1.62197e-26
ENSG00000213029		12.6534	-4.71926	0.418178	-11.2853	1.55115e-29	2.02997e-26
ENSG00000205485		44.5339	18.7707	1.66614	11.266	1.93202e-29	2.45818e-26
ENSG00000233225	SSBL3P1	173.494	-3.47904	0.310169	-11.2166	3.37996e-29	4.18421e-26
ENSG00000277108	SNORD49B	3.28804	-5.38325	0.480582	-11.2015	4.00737e-29	4.83036e-26
ENSG00000274420		5.57173	-4.98019	0.445919	-11.1684	5.82394e-29	6.84e-26
ENSG00000284503	MIR3652	11.4073	-6.45392	0.58035	-11.1207	9.94587e-29	1.1389e-25
ENSG00000235272	RAMACL	197.265	-2.6739	0.240753	-11.1064	1.16773e-28	1.30455e-25
ENSG00000251333	RTN3P1	456.922	-3.58607	0.324674	-11.0452	2.31377e-28	2.52333e-25
ENSG00000270521		14.9793	-5.51381	0.503684	-10.947	6.87087e-28	7.31891e-25
STRG.20819		106.283	20.0793	1.83589	10.9371	7.66051e-28	7.97459e-25
ENSG00000277599		5.67597	-5.38892	0.493031	-10.9302	8.26807e-28	8.41579e-25
ENSG00000264148		41.5782	-3.66577	0.335706	-10.9196	9.29233e-28	9.25273e-25
ENSG00000229503	RPL21P37	207.803	-3.25808	0.299855	-10.8655	1.68235e-27	1.63954e-24
ENSG00000202503	SNORD34	4.19378	-5.46408	0.50554	-10.8084	3.14145e-27	2.99773e-24
ENSG00000151552	QDPR	1103.04	-2.48343	0.230055	-10.795	3.63652e-27	3.37465e-24
ENSG00000250071		15.928	-5.34638	0.495321	-10.7938	3.6838e-27	3.37465e-24
ENSG00000182810	DDX28	720.243	-2.17077	0.201351	-10.781	4.23124e-27	3.80015e-24
ENSG00000282978		117.637	-3.98197	0.369623	-10.7731	4.61363e-27	4.0639e-24
ENSG00000202058	RN7SKP8	52.1731	-4.96954	0.461579	-10.7664	4.96057e-27	4.28705e-24
ENSG00000213671	OLA1P2	23.0082	-4.01577	0.373115	-10.7628	5.15525e-27	4.37279e-24
ENSG00000253680		14.7644	-5.9016	0.548513	-10.7593	5.35911e-27	4.46307e-24
ENSG00000226557	TRAF6P1	16.7915	-5.01097	0.466131	-10.7501	5.91834e-27	4.84078e-24
ENSG00000240979		12.9463	-5.4385	0.507367	-10.7191	8.28392e-27	6.61763e-24
STRG.28923		24.9574	20.6172	1.9236	10.718	8.37967e-27	6.61763e-24
ENSG00000284594	MIR7847	8.32681	-5.64732	0.528041	-10.6948	1.07598e-26	8.35323e-24
ENSG00000271400	CCDC121P1	11.0255	-5.18221	0.489176	-10.5938	3.18568e-26	2.43194e-23
ENSG00000260108		29.9371	-5.54044	0.523217	-10.5892	3.34498e-26	2.5117e-23
ENSG00000258967	HMGN1P3	9.82431	-5.61553	0.53047	-10.5859	3.46268e-26	2.55814e-23
ENSG00000200312	RN7SKP255	15.2811	-6.04986	0.571744	-10.5814	3.63484e-26	2.6427e-23
ENSG00000243199		2855.99	-3.56514	0.337477	-10.5641	4.37032e-26	3.12779e-23
ENSG00000284368	MIR547	4.14151	-5.5353	0.524526	-10.553	4.92205e-26	3.46846e-23
ENSG00000124467	PSG8	80.7865	19.5285	1.8558	10.523	6.76984e-26	4.69827e-23
ENSG00000235912		272.023	-3.72472	0.354239	-10.5147	7.39082e-26	5.05267e-23
ENSG00000230359	TPI1P2	94.791	-3.94635	0.376232	-10.4891	9.69198e-26	6.5284e-23
ENSG00000239912	RPL39P36	21.6603	-5.58197	0.533775	-10.4575	1.35328e-25	8.98342e-23
ENSG00000214578	HMGN2P15	58.2344	-4.42859	0.424449	-10.4338	1.73882e-25	1.13778e-22
ENSG00000102119	EMD	2009.86	-2.22202	0.213415	-10.4118	2.19113e-25	1.41356e-22
ENSG00000101278	RPS1P5	134.985	-5.36903	0.5165	-10.395	2.61242e-25	1.63917e-22
ENSG00000225695		240.43	-3.66116	0.35217	-10.396	2.58546e-25	1.63917e-22
ENSG00000199347	RNU5E-1	7.11998	-7.0794	0.682032	-10.3799	3.06206e-25	1.89533e-22
ENSG00000214653	HNRNPA3P3	157.259	-3.71071	0.357866	-10.369	3.43124e-25	2.09553e-22
ENSG00000253861	SLC2A3P1	22.9213	-4.06105	0.392048	-10.3585	3.8274e-25	2.30671e-22
ENSG00000249142		37.9293	-4.29349	0.414841	-10.3497	4.19667e-25	2.49642e-22
ENSG00000283701	MIR555	5.41332	-4.67706	0.454224	-10.2968	7.283e-25	4.2768e-22
ENSG00000244527		59.0572	-5.33247	0.518894	-10.2766	8.98295e-25	5.20829e-22
ENSG00000201793	RN7SKP9	9.05576	-7.54295	0.73672	-10.2386	1.33198e-24	7.62627e-22
ENSG00000237804	HNRNPA1P39	72.2921	-4.43168	0.433319	-10.2273	1.49656e-24	8.46277e-22
ENSG00000272831		170.692	-3.58478	0.35162	-10.195	2.08659e-24	1.16554e-21
ENSG00000250746		893.794	-5.04753	0.495251	-10.1919	2.1557e-24	1.18963e-21
ENSG00000222014	RAB6C	365.452	-4.12683	0.406641	-10.1486	3.36214e-24	1.83332e-21
ENSG00000229939		201.829	-3.72225	0.366894	-10.1453	3.47708e-24	1.8737e-21
ENSG00000169738	DCXR	1424.99	-2.34801	0.231604	-10.138	3.74517e-24	1.97177e-21
ENSG00000213237	PTMAP1	29.4685	-4.01362	0.395861	-10.1389	3.71077e-24	1.97177e-21
ENSG00000220472		1049.57	-3.35513	0.331715	-10.1145	4.76385e-24	2.47768e-21
ENSG00000169976	SF3B5	3585.5	-1.76685	0.174703	-10.1135	4.81429e-24	2.47768e-21
ENSG00000267422		257.475	-3.23136	0.31991	-10.1008	5.47672e-24	2.78728e-21
ENSG00000257846		12.4996	-4.22492	0.418509	-10.0952	5.80331e-24	2.92104e-21
ENSG00000100575	TIMM9	893.845	-2.28866	0.22718	-10.0742	7.18235e-24	3.57587e-21
ENSG00000241318	WDR82P2	23.2465	-4.85115	0.481822	-10.0684	7.62453e-24	3.75521e-21
ENSG00000256843		86.9486	-4.57872	0.455092	-10.0611	8.2081e-24	3.99962e-21
ENSG00000278144		4.1056	-5.3037	0.527891	-10.0469	9.47556e-24	4.56862e-21
ENSG00000227653	ISCA1P6	25.936	-4.18553	0.416876	-10.0402	1.01448e-23	4.84032e-21
ENSG00000156411	ATP5MJ	2964.64	-2.19846	0.219103	-10.0339	1.08134e-23	5.10616e-21
ENSG00000147586	MRPS28	1064.39	-2.20099	0.219458	-10.0292	1.13399e-23	5.30015e-21
ENSG00000231006	RPL7P32	1616.37	-3.95079	0.394148	-10.0236	1.20021e-23	5.49742e-21
ENSG00000270248		35.2827	-4.63336	0.462233	-10.0239	1.19721e-23	5.49742e-21
ENSG00000241458	RPL7P19	327.925	-5.00444	0.499614	-10.0166	1.28844e-23	5.84313e-21
ENSG00000229605	RPL21P93	961.972	-2.88708	0.288713	-9.99981	1.52683e-23	6.85639e-21
ENSG00000228502	EEF1A1P11	12861.6	-3.443	0.34439	-9.99741	1.56434e-23	6.95659e-21
ENSG00000230989	HSBP1	7523.64	-2.17514	0.217615	-9.99536	1.59704e-23	7.03375e-21
ENSG00000234009	RPL5P34	1848.64	-3.31424	0.331731	-9.99076	1.67299e-23	7.29805e-21
ENSG00000275307		4.42651	-5.58446	0.559234	-9.98591	1.7569e-23	7.5918e-21
ENSG00000119421	NDUFA8	2261.62	-1.62103	0.162433	-9.97966	1.87107e-23	8.00957e-21
ENSG00000275945	EIF3FP1	40.0953	-4.62424	0.46381	-9.97011	2.06004e-23	8.73685e-21
ENSG00000256664		12.3462	-4.14954	0.416614	-9.96014	2.27738e-23	9.53557e-21
ENSG00000279081		57.7602	-4.73296	0.475216	-9.95959	2.29e-23	9.53557e-21
ENSG00000217239		149.639	-4.08306	0.410905	-9.93675	2.88062e-23	1.18868e-20
ENSG00000262074	SNORD3B-2	68.2826	-5.93151	0.599351	-9.89655	4.30864e-23	1.76208e-20
ENSG00000087128	TMPRSS11E	38.3436	21.2554	2.14996	9.88639	4.76917e-23	1.93316e-20
ENSG00000272369		32.5965	-3.46071	0.350099	-9.88496	4.8377e-23	1.94374e-20
ENSG00000215063	RPL21P2	67.7187	-5.87701	0.595316	-9.87208	5.5012e-23	2.1911e-20
ENSG00000100348	TXN2	3399.95	-2.00072	0.202736	-9.86861	5.69497e-23	2.24873e-20
ENSG00000275231		8.71554	-6.38778	0.648253	-9.85384	6.59733e-23	2.58277e-20
ENSG00000232702		142.071	-3.61966	0.367441	-9.85099	6.78703e-23	2.63452e-20
ENSG00000235559	NOP56P1	14.241	-4.3891	0.445709	-9.84744	7.03124e-23	2.68317e-20
ENSG00000083782	EPYC	37.402	18.5162	1.8804	9.84692	7.0678e-23	2.68317e-20
ENSG00000227073	SDHDP2	131.543	-2.5641	0.260411	-9.84635	7.10802e-23	2.68317e-20
ENSG00000219102	HNRNPA3P12	69.1369	-3.58278	0.363889	-9.8458	7.14667e-23	2.68317e-20
ENSG00000213108	BTF3L4P3	22.5172	-4.67008	0.474959	-9.83258	8.15038e-23	3.03512e-20
ENSG00000196683	TOMM7	8042.68	-2.13891	0.217653	-9.82716	8.6007e-23	3.17699e-20
ENSG00000229204	PTGES3P3	92.7549	-3.1412	0.319957	-9.81757	9.4598e-23	3.46637e-20
ENSG00000176857	GJA1P1	80.7388	-5.1895	0.531093	-9.77136	1.49429e-22	5.40002e-20
ENSG00000225840		131.062	-11.1681	1.14297	-9.77116	1.49725e-22	5.40002e-20
ENSG00000213619	NDUFS3	1010.67	-1.76628	0.180866	-9.76568	1.58042e-22	5.65543e-20
ENSG00000235768	BRD7P5	37.323	-4.26171	0.436447	-9.76456	1.59808e-22	5.67429e-20
ENSG00000285138		11.3055	-3.81791	0.391113	-9.76167	1.64433e-22	5.79359e-20
ENSG00000240509	RPL34P18	1335.6	-3.56814	0.366114	-9.74597	1.91928e-22	6.71075e-20
ENSG00000214222	TUBBP2	30.159	-3.92234	0.403041	-9.73188	2.20486e-22	7.65086e-20
ENSG00000278009		23.276	-4.76378	0.489825	-9.72546	2.34834e-22	8.08746e-20
ENSG00000257175		54.7657	-3.50218	0.360203	-9.72278	2.41117e-22	8.2419e-20
ENSG00000240036		1673.86	-3.61736	0.37223	-9.71807	2.52533e-22	8.56815e-20
ENSG00000163541	SUCLG1	5786.59	-1.85392	0.190844	-9.71433	2.61966e-22	8.82285e-20
ENSG00000181741	FDX1P1	59.3185	-4.85396	0.500246	-9.70314	2.92363e-22	9.77473e-20
ENSG00000241494		969.777	-4.14358	0.427308	-9.69696	3.10631e-22	1.03102e-19
ENSG00000248873	SERBP1P6	104.434	-4.30001	0.44433	-9.67751	3.75749e-22	1.23819e-19
ENSG00000259917	HNRNPLP2	763.432	-2.9654	0.306484	-9.67555	3.83038e-22	1.25319e-19
ENSG00000232429	RPL21P131	25.5614	-5.53623	0.572797	-9.66526	4.23547e-22	1.3759e-19
ENSG00000275538	RNVU1-19	16.1086	-6.36069	0.658191	-9.6639	4.29207e-22	1.38447e-19
ENSG00000224261	RPSAP18	189.239	-4.40506	0.456123	-9.65762	4.56335e-22	1.46168e-19
ENSG00000233247	UBE2E4P	216.332	-3.2334	0.335069	-9.64995	4.91779e-22	1.56427e-19
ENSG00000111678	C12orf57	2943.52	-2.02011	0.209372	-9.6484	4.99282e-22	1.57718e-19
ENSG00000168802	CHTF8	1717.8	-3.27753	0.340034	-9.63885	5.48e-22	1.71922e-19
ENSG00000284518	MIR4658	4.64849	-4.92131	0.510786	-9.63478	5.70128e-22	1.77647e-19
transcript:ENST00000497872		87.0302	21.2128	2.20334	9.62757	6.11584e-22	1.89277e-19
ENSG00000137133	HINT2	1077.01	-2.09053	0.21732	-9.61961	6.60793e-22	2.03134e-19
ENSG00000226221	RPL26P19	3952.88	-3.18096	0.33085	-9.61452	6.94354e-22	2.12028e-19
ENSG00000188223		30.3725	18.6193	1.93796	9.60769	7.41955e-22	2.24322e-19
ENSG00000237758	BANF1P3	165.536	-3.79474	0.394983	-9.60735	7.44409e-22	2.24322e-19
ENSG00000143543	JTB	5917.15	-2.0728	0.215944	-9.59879	8.08893e-22	2.4216e-19
ENSG00000263266	RPS7P1	5648.48	-2.26292	0.235795	-9.59698	8.23186e-22	2.44839e-19
ENSG00000270503	YTHDF2P1	93.2518	-3.88231	0.405855	-9.56575	1.11386e-21	3.27409e-19
ENSG00000117691	NENF	2762.21	-2.0104	0.210169	-9.56564	1.1151e-21	3.27409e-19
ENSG00000236534	H3P36	416.804	-3.16451	0.330977	-9.5611	1.16511e-21	3.39917e-19
ENSG00000263934	SNORD3A	237.286	-4.87388	0.510065	-9.55542	1.23085e-21	3.5682e-19
ENSG00000224546	EIF4BP3	939.309	-2.759	0.288967	-9.54782	1.32458e-21	3.8158e-19
ENSG00000177447	CBX3P1	30.9906	-4.74089	0.497089	-9.53731	1.46579e-21	4.1962e-19
ENSG00000200463	SNORD118	4.84364	-4.75249	0.49836	-9.53625	1.48096e-21	4.21328e-19
ENSG00000228053		133.052	-3.87079	0.406699	-9.51758	1.77264e-21	5.01197e-19
ENSG00000272572		67.03	-3.23316	0.33999	-9.50955	1.91491e-21	5.38101e-19
ENSG00000214485	RPL7P1	8721.78	-2.27359	0.239187	-9.50547	1.9914e-21	5.56182e-19
ENSG00000173436	MICOS1	2850.2	-1.79295	0.188748	-9.49917	2.11561e-21	5.87294e-19
ENSG00000269176		224.774	-2.47052	0.260161	-9.49612	2.17866e-21	6.01154e-19
ENSG00000238072	CDC26P1	351.291	-2.24984	0.236946	-9.49515	2.19905e-21	6.03145e-19
ENSG00000182180	MRPS16	1267.12	-1.92379	0.202747	-9.4886	2.34157e-21	6.38414e-19
ENSG00000180867	PDIA3P1	5816.71	-2.97102	0.313175	-9.48676	2.38325e-21	6.42132e-19
ENSG00000219755		118.679	-3.8118	0.401794	-9.48696	2.37864e-21	6.42132e-19
ENSG00000106628	POLD2	2239.16	-1.78958	0.188899	-9.47375	2.69979e-21	7.23166e-19
ENSG00000239783		3.41151	-4.53425	0.478728	-9.47146	2.75959e-21	7.34887e-19
ENSG00000270022		26.098	-7.45928	0.788017	-9.46588	2.91088e-21	7.70694e-19
ENSG00000249855	EEF1A1P19	8382.45	-4.17192	0.440956	-9.46109	3.04752e-21	8.02234e-19
ENSG00000243648		42.5851	-5.71842	0.604568	-9.45869	3.11816e-21	8.16139e-19
ENSG00000065518	NDUFB4	2888.01	-2.09227	0.221491	-9.44631	3.5098e-21	9.13427e-19
ENSG00000224831	TMEM183B	589.663	-2.35291	0.249112	-9.44517	3.54814e-21	9.18186e-19
ENSG00000237765	FAM2B	1250.58	-2.30548	0.244208	-9.44063	3.70532e-21	9.53474e-19
ENSG00000205871	RPS3AP47	1147.74	-4.07818	0.432078	-9.43852	3.78089e-21	9.67486e-19
ENSG00000113732	ATP6VE1	10655.3	-1.94951	0.206617	-9.43537	3.89621e-21	9.91455e-19
ENSG00000215871		11.669	-5.82286	0.617913	-9.42343	4.36586e-21	1.10483e-18
ENSG00000223984	HNRNPRP1	64.6128	-4.32609	0.459275	-9.4194	4.53665e-21	1.14174e-18
ENSG00000101365	IDH3B	2550.73	-1.84757	0.196414	-9.4065	5.12953e-21	1.2839e-18
STRG.20821		42.1143	21.3633	2.27132	9.40568	5.16969e-21	1.28692e-18
ENSG00000169740	ZNF32	2398.79	-2.20372	0.234446	-9.39968	5.47318e-21	1.3551e-18
ENSG00000230592	RPSAP8	171.345	-4.07386	0.433439	-9.39892	5.51257e-21	1.35752e-18
ENSG00000187051	RPS19BP1	2250.96	-2.22738	0.237301	-9.3863	6.21441e-21	1.52216e-18
ENSG00000248780	ARL4AP2	41.3801	-3.78421	0.403616	-9.37577	6.86717e-21	1.67311e-18
ENSG00000240695		129.543	-3.65311	0.38986	-9.37032	7.23103e-21	1.75243e-18
ENSG00000233170		107.551	-2.86034	0.305374	-9.36667	7.48558e-21	1.80458e-18
ENSG00000126749	EMG1	2943.05	-1.95422	0.208677	-9.36478	7.62093e-21	1.81367e-18
ENSG00000185479	KRT6B	17.0077	20.1837	2.15515	9.36534	7.58057e-21	1.81367e-18
ENSG00000243304		20.3793	-4.93249	0.526723	-9.36449	7.6421e-21	1.81367e-18
ENSG00000213465	ARL2	1677.65	-2.0345	0.217419	-9.35753	8.16193e-21	1.92706e-18
ENSG00000154723	ATP5PF	4410.84	-1.65121	0.176545	-9.35289	8.52864e-21	2.00331e-18
ENSG00000265399		127.928	-3.03789	0.325057	-9.3457	9.12831e-21	2.13323e-18
ENSG00000187589	TERF1P2	20.387	-3.6382	0.389371	-9.3438	9.29367e-21	2.16085e-18
ENSG00000198225	FKBP1C	1416.46	-3.33657	0.357609	-9.33023	1.05645e-20	2.44392e-18
ENSG00000234491	HNRNPA1P51	18.8973	-6.22904	0.668657	-9.31575	1.211e-20	2.78736e-18
ENSG00000274015		27.7044	-3.12733	0.335973	-9.30828	1.29924e-20	2.97551e-18
ENSG00000119013		2170.98	-1.73968	0.187234	-9.29146	1.52188e-20	3.46808e-18
ENSG00000174446	SNAPC5	707.837	-2.46428	0.265379	-9.28588	1.60371e-20	3.63645e-18
ENSG00000230568	SF3A3P1	60.7351	-4.36717	0.470572	-9.28057	1.68582e-20	3.80381e-18
ENSG00000215021	PHB2	6234.6	-1.67901	0.180945	-9.27912	1.70892e-20	3.83702e-18
ENSG00000263590	LINC2591	30.9434	20.6468	2.22754	9.2689	1.88069e-20	4.2021e-18
ENSG00000258204		26.8634	-4.44611	0.479868	-9.26528	1.94559e-20	4.32601e-18
ENSG00000183978	COA3	2442.87	-1.76607	0.190642	-9.26377	1.97343e-20	4.34572e-18
ENSG00000283041		23120	-2.20362	0.237866	-9.26415	1.96632e-20	4.34572e-18
ENSG00000276965		6.16998	-5.50665	0.594622	-9.26077	2.02972e-20	4.4483e-18
ENSG00000226781	TBCAP1	278.38	-3.75998	0.406287	-9.2545	2.15237e-20	4.68567e-18
ENSG00000228589	SPCS2P4	1386.72	-2.62543	0.283702	-9.2542	2.1585e-20	4.68567e-18
ENSG00000284686		199.162	-5.87768	0.63577	-9.24497	2.35303e-20	5.08387e-18
ENSG00000125445	MRPS7	2166.05	-1.85339	0.200498	-9.24392	2.37618e-20	5.10978e-18
ENSG00000236893	ASS1P7	18.899	-3.7194	0.402423	-9.24251	2.40789e-20	5.15378e-18
ENSG00000267952		66.2393	21.948	2.37589	9.23781	2.516e-20	5.36013e-18
ENSG00000148842	CNNM2	3667.48	-2.57871	0.279503	-9.22607	2.80748e-20	5.95342e-18
ENSG00000257074	RPL29P33	156.729	-5.05363	0.547881	-9.22395	2.8634e-20	6.04402e-18
ENSG00000111639	MRPL51	3592.07	-1.83695	0.199552	-9.20535	3.4055e-20	7.15531e-18
ENSG00000279730	KMT5AP1	86.1303	-3.70043	0.402042	-9.20408	3.44601e-20	7.20735e-18
ENSG00000235552	RPL6P27	9799.71	-2.62076	0.284995	-9.19581	3.72187e-20	7.74894e-18
ENSG00000241095	CYP51A1P1	55.9866	-3.46869	0.377261	-9.1944	3.77087e-20	7.81542e-18
ENSG00000213740	SERBP1P1	405.798	-2.97743	0.324299	-9.18113	4.26579e-20	8.72279e-18
ENSG00000244255		97.7243	20.2386	2.20421	9.18178	4.24012e-20	8.72279e-18
ENSG00000233084	RPL23AP25	27.1313	-3.08996	0.336539	-9.18158	4.24793e-20	8.72279e-18
ENSG00000252155	RNU6-941P	3.50512	-6.02762	0.657152	-9.17235	4.62819e-20	9.42176e-18
ENSG00000085871	MGST2	1559.59	-1.82881	0.199474	-9.16817	4.81127e-20	9.71949e-18
ENSG00000137970	RPL7P9	12533	-2.15441	0.234994	-9.1679	4.82324e-20	9.71949e-18
ENSG00000278974		268.678	-2.13942	0.233381	-9.1671	4.85932e-20	9.71949e-18
ENSG00000253833	DSTNP3	127.804	-4.90738	0.535303	-9.16747	4.8423e-20	9.71949e-18
ENSG00000228106		224.094	-2.54253	0.277394	-9.1658	4.91805e-20	9.7942e-18
ENSG00000249465	RBMXP4	48.3433	-4.03409	0.440266	-9.16286	5.05389e-20	1.00211e-17
ENSG00000278899		52.5059	-3.10787	0.339225	-9.16168	5.10973e-20	1.00882e-17
ENSG00000228998		10.1933	-3.92175	0.428218	-9.1583	5.2722e-20	1.03643e-17
ENSG00000231856		206.795	-2.6552	0.289963	-9.15702	5.33523e-20	1.04136e-17
ENSG00000167283	ATP5MG	6388.52	-2.00164	0.218594	-9.15686	5.34278e-20	1.04136e-17
ENSG00000110200	ANAPC15	1011.1	-2.30123	0.251344	-9.15571	5.40028e-20	1.04811e-17
ENSG00000120860	WASHC3	1394.3	-2.06258	0.225498	-9.14677	5.86615e-20	1.13373e-17
ENSG00000213885	RPL13AP7	1359.09	-4.27019	0.466975	-9.14436	5.99858e-20	1.15445e-17
ENSG00000230979		1356.22	-3.94482	0.431435	-9.1435	6.04639e-20	1.15878e-17
ENSG00000259010	NUP5P1	23.1213	-4.26099	0.466601	-9.13197	6.72639e-20	1.28217e-17
ENSG00000244490	RWDD4P1	91.757	-2.47991	0.271573	-9.13165	6.74621e-20	1.28217e-17
ENSG00000259699	HMGB1P8	36.899	-4.21732	0.461864	-9.13108	6.78221e-20	1.28369e-17
ENSG00000214280		44.1658	-4.0146	0.440107	-9.12187	7.38407e-20	1.39185e-17
ENSG00000140990	NDUFB1	2166.28	-1.8318	0.200829	-9.12115	7.43304e-20	1.39534e-17
ENSG00000228398	HMGN2P25	9.41441	-6.85286	0.7515	-9.11891	7.5882e-20	1.41865e-17
ENSG00000257599	OVCH1-AS1	779.713	-3.98722	0.437842	-9.10652	8.50664e-20	1.5839e-17
ENSG00000233045	RPL15P5	352.255	-4.17193	0.458187	-9.1053	8.60266e-20	1.59529e-17
ENSG00000188243	COMMD6	4839.67	-2.13336	0.23451	-9.09711	9.27693e-20	1.71339e-17
ENSG00000172426	RSPH9	192.455	-4.23936	0.466372	-9.09007	9.89759e-20	1.82068e-17
ENSG00000237493		790.996	-2.5952	0.285605	-9.08667	1.02122e-19	1.87104e-17
ENSG00000249565	SERBP1P5	459.039	-3.03241	0.333741	-9.08612	1.02641e-19	1.87305e-17
ENSG00000109390	NDUFC1	3176.9	-1.94547	0.214129	-9.08549	1.0323e-19	1.87632e-17
ENSG00000224725	CEP57L1P1	36.2369	-3.18872	0.351318	-9.07645	1.12175e-19	2.03085e-17
ENSG00000259516	ANP32AP1	81.7633	-4.2125	0.464522	-9.06846	1.20716e-19	2.17688e-17
ENSG00000260668		46.2419	-3.4131	0.376413	-9.06742	1.21869e-19	2.18905e-17
ENSG00000184076	UQCR1	3908.01	-1.81774	0.200491	-9.06645	1.22958e-19	2.19999e-17
ENSG00000230383		2407.64	-3.88557	0.429073	-9.05574	1.35642e-19	2.41749e-17
ENSG00000271266	LAPTM4BP2	18.5607	-4.38143	0.483864	-9.05509	1.36456e-19	2.42257e-17
ENSG00000087884	AAMDC	872.054	-2.05987	0.227736	-9.045	1.49667e-19	2.64685e-17
ENSG00000232388	SMIM26	1937.64	-1.68568	0.18638	-9.04434	1.50565e-19	2.6525e-17
ENSG00000235363	SNRPGP1	129.662	-3.01539	0.333447	-9.04309	1.52302e-19	2.67282e-17
ENSG00000270066		44.704	-4.81881	0.533044	-9.04018	1.56413e-19	2.73449e-17
ENSG00000241739		6.12096	-5.67724	0.628098	-9.03877	1.58441e-19	2.7594e-17
ENSG00000148450	MSRB2	1743.72	-1.95721	0.216612	-9.03555	1.63179e-19	2.83115e-17
ENSG00000284525	MIR4687	2.67416	-4.50972	0.499178	-9.03429	1.65063e-19	2.85304e-17
ENSG00000144199	FAHD2B	290.457	-2.88479	0.319484	-9.02952	1.72429e-19	2.96916e-17
ENSG00000185641		3407.04	-3.48402	0.38597	-9.02667	1.76982e-19	3.03613e-17
ENSG00000236086	HMGN2P28	30.3562	-5.51189	0.610759	-9.02466	1.80258e-19	3.0808e-17
ENSG00000276118		5.27213	-5.44438	0.603598	-9.01988	1.88295e-19	3.2062e-17
ENSG00000242375		149.686	-2.53159	0.280807	-9.01544	1.96087e-19	3.32651e-17
ENSG00000188375	H3-5	1049.87	-4.1493	0.460347	-9.01341	1.99742e-19	3.37601e-17
ENSG00000223973	PAFAH1B1P2	18.3942	-4.83791	0.536868	-9.01135	2.0354e-19	3.42756e-17
ENSG00000224281	SLC25A5-AS1	238.639	-2.58473	0.286888	-9.00953	2.0694e-19	3.47205e-17
ENSG00000143314		2354.91	-1.62774	0.180751	-9.00542	2.14835e-19	3.59136e-17
ENSG00000175906	ARL4D	3053.25	-2.35688	0.261845	-9.00106	2.23549e-19	3.71457e-17
ENSG00000232499		305.073	-3.74207	0.415743	-9.00092	2.23828e-19	3.71457e-17
ENSG00000224870	MRPL2-AS1	412.719	-3.06307	0.340414	-8.99808	2.29706e-19	3.79835e-17
ENSG00000241434		4.26536	-4.14298	0.460635	-8.99406	2.3827e-19	3.91173e-17
ENSG00000211445	GPX3	47804.7	-3.80711	0.423281	-8.99428	2.37788e-19	3.91173e-17
ENSG00000271394	7SK	12.0134	-9.00453	1.0016	-8.99016	2.46874e-19	4.03851e-17
ENSG00000237943	PRKCQ-AS1	259.669	-2.91357	0.324412	-8.9811	2.68067e-19	4.36958e-17
ENSG00000235734	HMGN1P36	144.216	-2.90569	0.323638	-8.97821	2.75214e-19	4.47018e-17
ENSG00000255329	H2AZP4	8.16327	-5.98703	0.666983	-8.97627	2.8009e-19	4.5333e-17
ENSG00000270966		20.937	-4.50362	0.5021	-8.96956	2.97691e-19	4.78436e-17
ENSG00000138175	ARL3	2943.1	-1.88637	0.210303	-8.96978	2.97118e-19	4.78436e-17
ENSG00000116885		637.617	-2.27163	0.253297	-8.96824	3.01297e-19	4.82538e-17
ENSG00000141698	NT5C3B	2392.22	-2.34078	0.26116	-8.96301	3.15946e-19	5.04236e-17
ENSG00000172428	COPS9	2130.19	-1.84556	0.205952	-8.96112	3.21388e-19	5.11141e-17
ENSG00000223861		89.5565	-5.52838	0.617159	-8.95778	3.31271e-19	5.23226e-17
ENSG00000239532		38.3648	-6.09733	0.680647	-8.95813	3.30227e-19	5.23226e-17
ENSG00000170296	GABARAP	10837.6	-2.29544	0.256264	-8.95733	3.32636e-19	5.23576e-17
ENSG00000256238	SUPT16HP1	168.989	-3.92166	0.437864	-8.95634	3.3562e-19	5.26463e-17
ENSG00000280046		765.873	-4.52412	0.505366	-8.95218	3.48544e-19	5.4487e-17
ENSG00000236539	HNRNPA1P54	52.7213	-4.73862	0.529357	-8.95165	3.50218e-19	5.45626e-17
ENSG00000236035	NSA2P1	72.9671	-3.83949	0.429073	-8.94833	3.60912e-19	5.6038e-17
ENSG00000227939	RPL3P2	715.62	-4.09423	0.457592	-8.94732	3.6421e-19	5.6359e-17
ENSG00000233205	WBP1P2	169.227	-2.72082	0.304157	-8.94543	3.70491e-19	5.7138e-17
ENSG00000177556	ATOX1	2435.19	-1.86975	0.209148	-8.93986	3.89679e-19	5.98954e-17
ENSG00000206588	RNU1-28P	8.39455	-5.25719	0.588184	-8.938	3.96278e-19	6.07061e-17
ENSG00000139684	ESD	5665.46	-2.08116	0.232968	-8.93323	4.13765e-19	6.31736e-17
ENSG00000233087		349.452	-3.59069	0.402065	-8.93063	4.23571e-19	6.44559e-17
ENSG00000215695	RSC1A1	54.7843	-4.58266	0.513358	-8.92682	4.38445e-19	6.64985e-17
ENSG00000198932	GPRASP1	1023.1	-4.61666	0.517357	-8.92355	4.51586e-19	6.80409e-17
ENSG00000200795	RNU4-1	17.4915	-5.89757	0.66088	-8.92381	4.50506e-19	6.80409e-17
ENSG00000231244	PSMC1P3	21.5403	-6.48249	0.726763	-8.91968	4.67653e-19	6.9553e-17
ENSG00000218586		60.1685	-4.93222	0.55296	-8.91967	4.67695e-19	6.9553e-17
ENSG00000271367		27.5846	-4.90489	0.549831	-8.92071	4.63316e-19	6.9553e-17
ENSG00000169189	NSMCE1	2366.78	-1.9079	0.213887	-8.92017	4.65581e-19	6.9553e-17
ENSG00000225671	FCF1P6	14.2375	-3.91118	0.438587	-8.91767	4.76186e-19	7.05865e-17
ENSG00000228169	PPIAP19	83.2714	-5.10698	0.572756	-8.9165	4.81251e-19	7.08785e-17
ENSG00000284005	MIR684	2.43449	-4.34477	0.487272	-8.91652	4.81169e-19	7.08785e-17
ENSG00000213938	SEPHS1P6	42.5129	-4.53509	0.508791	-8.91345	4.94668e-19	7.26211e-17
ENSG00000184752	NDUFA12	2214.06	-1.95173	0.219096	-8.90808	5.19245e-19	7.59857e-17
ENSG00000143575	HAX1	2795.28	-1.89851	0.213156	-8.90667	5.25861e-19	7.67087e-17
ENSG00000122644	ARL4A	538.101	-2.63715	0.296104	-8.90618	5.28225e-19	7.68089e-17
ENSG00000253919	THAP12P7	204.538	-3.32569	0.3739	-8.89461	5.86238e-19	8.49748e-17
ENSG00000129559	NEDD8	1870.37	-2.12598	0.239044	-8.89366	5.91267e-19	8.54333e-17
ENSG00000088832	FKBP1A	8625.71	-2.26411	0.254681	-8.88997	6.11279e-19	8.80472e-17
ENSG00000133134	BEX2	3437.01	-2.46333	0.277117	-8.88913	6.15887e-19	8.84329e-17
ENSG00000204070	SYS1	2806.98	-1.78051	0.200511	-8.87988	6.69343e-19	9.58081e-17
ENSG00000266402	SNHG25	84.9646	-4.655	0.524521	-8.87476	7.00831e-19	1.00003e-16
ENSG00000283371		8.56596	-5.25876	0.592951	-8.86879	7.3943e-19	1.04857e-16
ENSG00000181524	RPL24P4	5116.89	-2.63343	0.296922	-8.86911	7.3733e-19	1.04857e-16
ENSG00000278943		488.594	-4.69124	0.529088	-8.86665	7.53805e-19	1.06566e-16
ENSG00000269893	SNHG8	4231.24	-2.274	0.25648	-8.86617	7.57067e-19	1.06697e-16
ENSG00000250011	HMGB1P3	46.0994	-4.58146	0.516936	-8.86273	7.80795e-19	1.09619e-16
ENSG00000267697		5.1698	-4.16331	0.469769	-8.86247	7.82582e-19	1.09619e-16
ENSG00000166352	IFTAP	1029.44	-3.02879	0.341879	-8.85926	8.05484e-19	1.12483e-16
ENSG00000105518	TMEM25	4333.76	-1.67968	0.189685	-8.85507	8.3633e-19	1.162e-16
ENSG00000230311	TOMM2P4	261.465	-2.68235	0.302921	-8.85495	8.37179e-19	1.162e-16
ENSG00000070761	CFAP2	1648.92	-1.85284	0.20927	-8.85382	8.45717e-19	1.17031e-16
ENSG00000278050		4.65164	-4.96922	0.561493	-8.85001	8.75095e-19	1.20731e-16
ENSG00000212498	SNORD86	2.6305	-4.49348	0.508133	-8.84312	9.30813e-19	1.28033e-16
ENSG00000200693	U3	59.0084	-3.45131	0.390513	-8.83788	9.75484e-19	1.33776e-16
ENSG00000240914	RPL15P2	587.109	-4.48605	0.507839	-8.83361	1.01348e-18	1.38571e-16
ENSG00000128581	IFT22	1745.66	-1.94863	0.220735	-8.82792	1.06643e-18	1.45377e-16
ENSG00000140319	SRP14	10057.1	-1.94882	0.220888	-8.82266	1.11774e-18	1.51919e-16
ENSG00000184945	AQP12A	16.4499	20.1268	2.28137	8.82224	1.12192e-18	1.52037e-16
ENSG00000277306		3.82077	-5.39503	0.611674	-8.82011	1.14346e-18	1.54499e-16
ENSG00000270983		58.2444	-4.20058	0.476304	-8.81912	1.15363e-18	1.55209e-16
ENSG00000100216	TOMM22	2515.96	-1.84034	0.208688	-8.81861	1.15888e-18	1.55209e-16
ENSG00000232531	KMT5AP2	97.2658	-3.41545	0.387289	-8.81886	1.15628e-18	1.55209e-16
ENSG00000130349	MTRES1	807.938	-1.9343	0.219408	-8.81602	1.18602e-18	1.58381e-16
ENSG00000178631	ACTG1P1	50.482	-4.10791	0.466048	-8.81435	1.20377e-18	1.60284e-16
ENSG00000259102	SMARCE1P3	21.128	-4.57254	0.519115	-8.80834	1.27012e-18	1.68628e-16
ENSG00000182712	CMC4	919.563	-1.96425	0.223032	-8.80699	1.28546e-18	1.70172e-16
ENSG00000219932	RPL12P8	426.114	-3.66273	0.41596	-8.8055	1.30272e-18	1.71959e-16
ENSG00000186153	WWOX	1086.37	-2.37105	0.269654	-8.79295	1.45688e-18	1.91756e-16
ENSG00000235036		130.797	-3.48288	0.396513	-8.78377	1.58085e-18	2.07476e-16
ENSG00000228217	PNRC2P1	181.449	-3.4644	0.394556	-8.78052	1.62727e-18	2.12958e-16
ENSG00000226970		67.2693	-4.38054	0.499062	-8.77755	1.67067e-18	2.18016e-16
ENSG00000237842	SMU1P1	187.97	-3.71356	0.423387	-8.77108	1.76961e-18	2.30271e-16
ENSG00000239899	RN7SL674P	6.5893	-5.63331	0.642393	-8.76926	1.79848e-18	2.33364e-16
ENSG00000236360	RRAS2P1	102.472	-2.8178	0.321404	-8.76717	1.83218e-18	2.37065e-16
ENSG00000173013	CCDC96	154.25	-2.43352	0.277615	-8.76582	1.8542e-18	2.39239e-16
ENSG00000234742		1672.41	-3.37711	0.385335	-8.76409	1.88299e-18	2.42271e-16
ENSG00000227199	ST7-AS1	233.214	-2.79991	0.319641	-8.75956	1.96018e-18	2.51495e-16
ENSG00000205138	SDHAF1	803.438	-1.62715	0.185821	-8.7565	2.01398e-18	2.56959e-16
ENSG00000092841	MYL6	29981.7	-2.28425	0.26086	-8.75662	2.012e-18	2.56959e-16
ENSG00000130724	CHMP2A	4817.33	-1.71014	0.195453	-8.74962	2.14076e-18	2.72375e-16
ENSG00000284079	MIR4775	2.73929	-4.57521	0.522974	-8.74845	2.16295e-18	2.74437e-16
ENSG00000225053	PRPF38AP1	13.3802	-5.04415	0.576788	-8.74524	2.2255e-18	2.81593e-16
ENSG00000231841	FAM192BP	310.614	-2.26426	0.259003	-8.74221	2.28597e-18	2.88448e-16
ENSG00000263563	UBBP4	1530.31	-5.0088	0.573097	-8.73989	2.33338e-18	2.93621e-16
ENSG00000226098	SEC11B	203.953	-3.98847	0.456533	-8.73643	2.40602e-18	3.01529e-16
ENSG00000129562	DAD1	5824.23	-2.32822	0.2665	-8.73627	2.40939e-18	3.01529e-16
ENSG00000243904	RPSAP5	72.1755	-5.23817	0.599726	-8.73427	2.45224e-18	3.06056e-16
ENSG00000269559		39.223	-2.97486	0.34061	-8.73391	2.46023e-18	3.06218e-16
ENSG00000232952		240.792	-3.97142	0.455443	-8.7199	2.78455e-18	3.45647e-16
ENSG00000229091	HSPA8P8	142.588	-6.08566	0.698241	-8.7157	2.88978e-18	3.57739e-16
ENSG00000187534	PRR13P5	358.365	-2.21187	0.253849	-8.71332	2.95114e-18	3.64351e-16
ENSG00000284195	MIR6852	2.36031	-3.9669	0.455399	-8.71084	3.01642e-18	3.71409e-16
ENSG00000236044	FABP5P2	35.1549	-4.4865	0.51515	-8.70911	3.06259e-18	3.76083e-16
ENSG00000227850	SEPTIN2P1	99.1296	-4.58747	0.526908	-8.70639	3.13714e-18	3.84207e-16
ENSG00000243721	RPL23AP63	70.1443	-5.41052	0.621513	-8.7054	3.16462e-18	3.86539e-16
ENSG00000129255	MPDU1	1619.22	-1.68329	0.193407	-8.70334	3.22248e-18	3.9256e-16
ENSG00000231416		43.3983	-3.91139	0.44943	-8.70302	3.23177e-18	3.92647e-16
ENSG00000235376	RPEL1	64.8861	-3.73974	0.429734	-8.70246	3.24777e-18	3.93547e-16
ENSG00000168569	TMEM223	1070.8	-1.76537	0.202888	-8.70121	3.28376e-18	3.96859e-16
ENSG00000233954	UQCRHL	900.631	-2.50387	0.287783	-8.70056	3.30241e-18	3.98062e-16
ENSG00000259022	DNAJC8P1	120.942	-4.11331	0.472953	-8.69709	3.40492e-18	4.09341e-16
ENSG00000106803	SEC61B	4416.16	-1.79541	0.20647	-8.69574	3.44576e-18	4.13167e-16
ENSG00000240087	RPSAP12	1796.53	-2.59914	0.298941	-8.6945	3.48375e-18	4.1663e-16
ENSG00000111716	LDHB	21402.5	-1.50481	0.173097	-8.69344	3.51637e-18	4.19437e-16
ENSG00000279030		18.5481	-4.99601	0.574998	-8.68874	3.66478e-18	4.36005e-16
ENSG00000282949	PCMTD1P7	9.91154	-5.28809	0.608802	-8.68606	3.75224e-18	4.45253e-16
ENSG00000204822	MRPL53	1165.87	-1.89108	0.217784	-8.68326	3.84577e-18	4.55172e-16
ENSG00000257553		191.323	-3.86506	0.445145	-8.68269	3.8651e-18	4.56282e-16
ENSG00000253626	EIF5AL1	1076.4	-3.15476	0.363595	-8.67658	4.07837e-18	4.80221e-16
ENSG00000013583	HEBP1	4963.55	-1.9047	0.2196	-8.67349	4.19064e-18	4.92175e-16
ENSG00000172301	COPRS	2893.16	-1.9966	0.230212	-8.67287	4.21363e-18	4.93609e-16
ENSG00000213985		186.891	-3.5645	0.411029	-8.67214	4.24065e-18	4.95507e-16
ENSG00000277873		24.4017	-3.50181	0.403839	-8.67131	4.2719e-18	4.97888e-16
ENSG00000277918	RNVU1-28	7.67432	-5.62885	0.649245	-8.66984	4.32716e-18	5.03049e-16
ENSG00000233543	CHTF8P1	34.1666	-6.82802	0.787773	-8.6675	4.41694e-18	5.12187e-16
ENSG00000213080		323.486	-3.48305	0.402392	-8.65586	4.89204e-18	5.65846e-16
ENSG00000173418	NAA2	3743.86	-1.75325	0.202578	-8.65467	4.94343e-18	5.7035e-16
ENSG00000275075		4.86169	-5.20945	0.601994	-8.65366	4.98734e-18	5.73671e-16
ENSG00000224155		36.1656	-3.54547	0.409718	-8.65343	4.99726e-18	5.73671e-16
ENSG00000076248	UNG	2343.1	-1.70008	0.19648	-8.6527	5.02953e-18	5.75932e-16
ENSG00000088727	KIF9	783.247	-1.91127	0.221032	-8.64703	5.28592e-18	6.02279e-16
ENSG00000234383	CTBP2P8	66.0013	-3.75858	0.434662	-8.64713	5.28119e-18	6.02279e-16
ENSG00000241007	SEPTIN7P6	156.46	-4.16661	0.481961	-8.64513	5.37441e-18	6.10842e-16
ENSG00000273679		44.3903	-3.77469	0.436668	-8.64431	5.41319e-18	6.13727e-16
ENSG00000239470		937.794	-2.79016	0.322793	-8.6438	5.43717e-18	6.14924e-16
ENSG00000141504	SAT2	1800.76	-2.39862	0.27754	-8.64246	5.5017e-18	6.2069e-16
ENSG00000234743	EIF5AP4	292.289	-3.3118	0.383518	-8.63533	5.85573e-18	6.59007e-16
ENSG00000253541	SEPTIN1P1	119.467	-3.21105	0.371954	-8.63294	5.97968e-18	6.71307e-16
ENSG00000232385	RPS3AP25	522.348	-4.28475	0.496449	-8.63081	6.09205e-18	6.8225e-16
ENSG00000202444	RNU5E-6P	4.19555	-5.02714	0.582517	-8.63002	6.13395e-18	6.85267e-16
ENSG00000206737	RNVU1-18	8.94311	-4.94616	0.573217	-8.62877	6.20141e-18	6.8944e-16
ENSG00000226210	WASH8P	489.624	7.14979	0.828589	8.62887	6.19616e-18	6.8944e-16
ENSG00000106399	RPA3	1161.75	-1.74985	0.202931	-8.62286	6.53e-18	7.24213e-16
ENSG00000248697	TOX4P1	60.7211	-4.01891	0.46627	-8.61927	6.73795e-18	7.45471e-16
ENSG00000219642	BMPR1AP1	135.65	-4.15261	0.481937	-8.61649	6.90353e-18	7.6195e-16
ENSG00000270170	NCBP2AS2	824.754	-1.69981	0.197475	-8.60776	7.45031e-18	8.20322e-16
ENSG00000198258	UBL5	5894.38	-1.93676	0.225079	-8.60482	7.64347e-18	8.39572e-16
ENSG00000242858		130.964	-5.02861	0.584779	-8.59916	8.02999e-18	8.79917e-16
ENSG00000137509	PRCP	5146.14	-2.29022	0.266342	-8.59881	8.05495e-18	8.80546e-16
ENSG00000175756	AURKAIP1	2559.77	-1.43889	0.167365	-8.59732	8.1596e-18	8.89863e-16
ENSG00000178464	RPL1P16	13342.2	-2.01625	0.234566	-8.59565	8.27914e-18	9.00755e-16
ENSG00000180581	SRP9P1	483.487	-2.7055	0.314841	-8.59324	8.45513e-18	9.17722e-16
ENSG00000213246	SUPT4H1	2604.16	-1.99118	0.231722	-8.59296	8.47536e-18	9.17743e-16
ENSG00000264350	SNRPGP2	164.6	-4.02595	0.468591	-8.59161	8.57612e-18	9.26464e-16
ENSG00000225259	ST13P6	376.81	-3.28811	0.382963	-8.58598	9.00679e-18	9.70699e-16
ENSG00000257851	HNRNPA3P1	138.656	-4.16861	0.485539	-8.58552	9.04284e-18	9.72297e-16
ENSG00000282100	HSP9AB4P	21.9627	-5.45491	0.635562	-8.58282	9.2577e-18	9.93067e-16
ENSG00000258645	HSPE1P2	164.118	-4.05778	0.472827	-8.58196	9.32729e-18	9.98194e-16
ENSG00000174460	ZCCHC12	12022.4	6.90956	0.805497	8.57801	9.65308e-18	1.03065e-15
ENSG00000131495	NDUFA2	2827.99	-1.58962	0.185324	-8.57749	9.69649e-18	1.03288e-15
ENSG00000183298	RPSAP19	1906.79	-2.59092	0.302219	-8.57301	1.00817e-17	1.06814e-15
ENSG00000163170	BOLA3	719.327	-1.69403	0.197605	-8.57283	1.00975e-17	1.06814e-15
ENSG00000267251		64.8111	-3.09076	0.360519	-8.5731	1.00738e-17	1.06814e-15
ENSG00000233913	RPL1P9	6114.88	-2.72346	0.317723	-8.57181	1.01868e-17	1.0751e-15
ENSG00000255872		9.40926	-6.13278	0.715518	-8.5711	1.02505e-17	1.07576e-15
ENSG00000278376		184.834	-2.81048	0.327907	-8.57099	1.02602e-17	1.07576e-15
ENSG00000283928	MIR637	3.09997	-4.72948	0.551803	-8.57095	1.02635e-17	1.07576e-15
ENSG00000223396	RPS1P7	359.852	-3.16792	0.369681	-8.56933	1.04086e-17	1.08848e-15
ENSG00000106245	BUD31	2461.36	-1.5256	0.178216	-8.5604	1.12481e-17	1.17359e-15
ENSG00000257649	METTL7AP1	5.84209	-7.18184	0.839387	-8.55605	1.168e-17	1.21589e-15
ENSG00000219294	PIP5K1P1	14.7736	-4.87854	0.570221	-8.55553	1.17333e-17	1.21867e-15
ENSG00000273010		27.1916	-3.14414	0.367636	-8.55232	1.20638e-17	1.25016e-15
ENSG00000267253	WHSC1L2P	38.9525	-4.36668	0.510603	-8.55201	1.20968e-17	1.25075e-15
ENSG00000242882	RPL5P11	44.4907	-3.92152	0.458609	-8.55089	1.22139e-17	1.26001e-15
ENSG00000196465	MYL6B	1932.92	-1.81064	0.211775	-8.54983	1.2327e-17	1.26882e-15
ENSG00000197620	EOLA1	945.895	-1.74706	0.204365	-8.54874	1.24444e-17	1.2765e-15
ENSG00000257727	CNPY2	4170.57	-1.84462	0.21578	-8.54862	1.24574e-17	1.2765e-15
ENSG00000225356		483.277	-3.96014	0.463621	-8.54176	1.32192e-17	1.35155e-15
ENSG00000074071	MRPS34	2009.63	-1.45515	0.170448	-8.5372	1.37511e-17	1.40279e-15
ENSG00000186395	KRT1	1301.43	-1.91421	0.224297	-8.53429	1.41014e-17	1.43533e-15
ENSG00000255833	TIFAB	46.7417	19.2459	2.25554	8.53275	1.42911e-17	1.45142e-15
ENSG00000276784		12.9794	-5.84096	0.684594	-8.53201	1.43832e-17	1.45754e-15
ENSG00000214784	RPS3AP21	1817.57	-3.92955	0.460726	-8.52903	1.47575e-17	1.49217e-15
ENSG00000258357	NSA2P2	55.2882	-4.53953	0.53246	-8.52557	1.52056e-17	1.53409e-15
ENSG00000241837	ATP5PO	6782.49	-1.87932	0.220484	-8.5236	1.54668e-17	1.55701e-15
ENSG00000239557	PPP2R5CP	148.511	-3.44462	0.404218	-8.52167	1.57268e-17	1.57971e-15
ENSG00000122033	MTIF3	1735.67	-1.9731	0.231611	-8.51901	1.6093e-17	1.61296e-15
ENSG00000258581		61.7594	-4.62792	0.543307	-8.51807	1.6224e-17	1.62254e-15
ENSG00000278133		608.205	-2.5155	0.295387	-8.51595	1.65223e-17	1.64878e-15
ENSG00000212802	RPL15P3	8239.69	-2.06235	0.24229	-8.51192	1.71084e-17	1.70355e-15
ENSG00000274430		3.00239	-4.61361	0.542057	-8.5113	1.71996e-17	1.70892e-15
ENSG00000166228	PCBD1	4026.98	-1.596	0.187571	-8.50878	1.75778e-17	1.74272e-15
ENSG00000241468	ATP5MF	3191.84	-1.56735	0.184237	-8.50724	1.78121e-17	1.76213e-15
ENSG00000253785		361.207	-3.36368	0.395454	-8.50586	1.80253e-17	1.77938e-15
ENSG00000100142	POLR2F	1450.38	-1.88997	0.222238	-8.50426	1.8276e-17	1.80024e-15
ENSG00000255040	MORF4L1P3	46.1929	-6.12056	0.719787	-8.50329	1.84289e-17	1.81142e-15
ENSG00000184423	RPL23AP38	9.34006	-5.21584	0.613416	-8.50294	1.84853e-17	1.81306e-15
ENSG00000237415	NRBF2P3	31.7953	-4.27483	0.503019	-8.49834	1.92316e-17	1.88223e-15
ENSG00000259536		34.8635	-4.35201	0.512185	-8.49694	1.94648e-17	1.901e-15
ENSG00000184844	CYCSP45	68.0496	-4.08303	0.480692	-8.49407	1.99518e-17	1.94441e-15
ENSG00000234518		543.519	-2.57197	0.302817	-8.4935	2.00508e-17	1.9499e-15
ENSG00000126267	COX6B1	5661.88	-1.59186	0.187492	-8.49028	2.06147e-17	1.99627e-15
ENSG00000143183		4727.18	-1.95531	0.230299	-8.49031	2.06091e-17	1.99627e-15
ENSG00000129055	ANAPC13	2808.78	-2.35395	0.277334	-8.48778	2.10631e-17	2.03539e-15
ENSG00000164898	FMC1	1197.03	-1.57445	0.185546	-8.48551	2.14769e-17	2.06665e-15
ENSG00000228283	KATNBL1P6	84.6994	-3.14672	0.370825	-8.48573	2.14377e-17	2.06665e-15
ENSG00000169714	CNBP	9319.62	-2.85716	0.336756	-8.48435	2.16929e-17	2.08306e-15
ENSG00000256060	TRAPPC2B	478.816	-1.74145	0.205304	-8.4823	2.20779e-17	2.1156e-15
STRG.20831		53.0957	19.6657	2.31853	8.48198	2.21402e-17	2.11714e-15
ENSG00000229367	HMGN2P19	25.8254	-5.87772	0.693022	-8.48129	2.22709e-17	2.12521e-15
ENSG00000170310	STX8	1494.19	-1.85523	0.218808	-8.47882	2.27492e-17	2.16633e-15
ENSG00000268034		104.751	-3.69055	0.435389	-8.47644	2.32185e-17	2.20643e-15
ENSG00000226525	RPS7P1	1623.92	-3.36953	0.397528	-8.4762	2.32678e-17	2.20654e-15
ENSG00000207205	RNVU1-15	10.0607	-5.28167	0.623157	-8.47566	2.33748e-17	2.21211e-15
ENSG00000248161		32.8751	-2.85412	0.336897	-8.4718	2.41634e-17	2.28202e-15
ENSG00000161999	JMJD8	3343.92	-2.14503	0.253213	-8.47126	2.4275e-17	2.28785e-15
ENSG00000142507	PSMB6	3396.09	-1.48677	0.175523	-8.47047	2.44404e-17	2.29399e-15
ENSG00000217416	ISCA1P1	105.003	-2.99144	0.353151	-8.4707	2.43927e-17	2.29399e-15
ENSG00000233426	EIF3FP3	1452.01	-1.99245	0.235247	-8.46959	2.46268e-17	2.30676e-15
ENSG00000234268		883.418	-4.89297	0.577751	-8.46899	2.4752e-17	2.31376e-15
ENSG00000197345	MRPL21	1672.81	-1.65997	0.196079	-8.46584	2.54305e-17	2.37234e-15
ENSG00000217643		58.2114	-4.00316	0.472879	-8.4655	2.55057e-17	2.37451e-15
ENSG00000241069		33.3197	-6.34741	0.749861	-8.46479	2.56624e-17	2.38426e-15
ENSG00000131848	ZSCAN5A	224.81	-2.00532	0.236919	-8.46413	2.58068e-17	2.39282e-15
ENSG00000065427	KARS1	5033.47	-1.94082	0.229349	-8.46227	2.62231e-17	2.42162e-15
ENSG00000213025	COX2P1	109.48	-3.24595	0.383574	-8.46237	2.62003e-17	2.42162e-15
ENSG00000213236	YWHAZP2	177.81	-4.38601	0.518364	-8.46126	2.645e-17	2.43766e-15
ENSG00000196922	ZNF252P	1871.66	-2.37353	0.280591	-8.45903	2.69614e-17	2.47483e-15
ENSG00000173163	COMMD1	1558.68	-1.87077	0.221156	-8.45907	2.69518e-17	2.47483e-15
ENSG00000119705	SLIRP	1509.02	-1.84096	0.217684	-8.45707	2.74188e-17	2.51178e-15
ENSG00000227581	STAU2P1	13.4607	-3.75954	0.444799	-8.45223	2.85801e-17	2.61294e-15
ENSG00000213492	NT5C3AP1	102.82	-2.675	0.316535	-8.45088	2.89118e-17	2.638e-15
ENSG00000141759	TXNL4A	1803.3	-1.6267	0.192657	-8.44353	3.07904e-17	2.80382e-15
ENSG00000231167	YBX1P2	258.777	-3.46705	0.410632	-8.44319	3.08784e-17	2.80626e-15
ENSG00000130159	ECSIT	969.282	-1.75535	0.207907	-8.44294	3.09443e-17	2.80668e-15
ENSG00000116288	PARK7	11440.3	-1.82589	0.216302	-8.44142	3.13495e-17	2.83781e-15
ENSG00000230593	PPIAP4	62.0272	-4.77417	0.566059	-8.43406	3.33876e-17	3.01576e-15
ENSG00000169020	ATP5ME	4199.46	-1.64534	0.195088	-8.43385	3.3447e-17	3.01576e-15
ENSG00000243547	HNRNPKP4	1268.06	-3.62463	0.429798	-8.43334	3.35939e-17	3.02305e-15
ENSG00000162236	STX5	2502.38	-1.92786	0.228625	-8.43243	3.38553e-17	3.04061e-15
ENSG00000218418		385.879	-3.06991	0.364227	-8.42855	3.49969e-17	3.13698e-15
ENSG00000213260	YWHAZP5	82.8214	-4.27428	0.507201	-8.42719	3.54063e-17	3.16748e-15
ENSG00000270665	HNRNPA1P67	22.4384	-5.83382	0.692451	-8.42489	3.61098e-17	3.22412e-15
ENSG00000256537	SMIM1L1	520.48	-1.98498	0.235638	-8.42386	3.64276e-17	3.24617e-15
ENSG00000182117	NOP1	2669.36	-1.65247	0.19624	-8.42069	3.74282e-17	3.32886e-15
ENSG00000213569	GTF3C6P2	192.453	-3.40608	0.404613	-8.41811	3.82605e-17	3.39628e-15
ENSG00000274559		47.8077	-3.2818	0.38988	-8.41747	3.84698e-17	3.40826e-15
ENSG00000257773	ST13P3	178.205	-3.63102	0.431495	-8.41498	3.92945e-17	3.47461e-15
ENSG00000213326	RPS7P11	1454.46	-3.67403	0.436759	-8.41203	4.02976e-17	3.55644e-15
ENSG00000259826		78.9342	-2.83628	0.3372	-8.41126	4.05641e-17	3.57307e-15
ENSG00000262554		3.52644	-4.42147	0.525907	-8.40733	4.19441e-17	3.68754e-15
ENSG00000090266	NDUFB2	8588.71	-1.61754	0.192413	-8.40661	4.22049e-17	3.70336e-15
ENSG00000257698	GIHCG	400.848	-2.10816	0.250808	-8.40549	4.26067e-17	3.73146e-15
ENSG00000233786	CDC27P1	28.6278	-3.40127	0.404704	-8.40434	4.30283e-17	3.7612e-15
ENSG00000141030	COPS3	1677.69	-1.55345	0.184855	-8.40358	4.3307e-17	3.77835e-15
ENSG00000239539	HMGN1P2	2.13269	-5.13136	0.61075	-8.40174	4.39901e-17	3.83065e-15
ENSG00000248610	HSPA8P4	16.5164	-4.72016	0.561836	-8.40132	4.41495e-17	3.83724e-15
ENSG00000213338	ATF4P1	18.528	-5.07435	0.604114	-8.39965	4.47813e-17	3.88478e-15
ENSG00000138085	ATRAID	6559.86	-2.00031	0.238471	-8.38805	4.94258e-17	4.27958e-15
ENSG00000113845	TIMMDC1	2386.86	-2.06419	0.24613	-8.38659	5.00461e-17	4.32512e-15
ENSG00000229067		8.35866	-5.84928	0.697498	-8.38609	5.02589e-17	4.33533e-15
ENSG00000105583	WDR83OS	4032.47	-1.79211	0.213716	-8.38547	5.05214e-17	4.34978e-15
ENSG00000264364	DYNLL2	13581.5	-1.99363	0.237798	-8.38371	5.12864e-17	4.40736e-15
ENSG00000236801	RPL24P8	1943.85	-2.9484	0.351741	-8.38229	5.19076e-17	4.45239e-15
ENSG00000089220	PEBP1	52836.7	-1.92618	0.229923	-8.37753	5.40498e-17	4.62747e-15
ENSG00000272056		20.6907	-4.60107	0.549479	-8.37351	5.59252e-17	4.7791e-15
ENSG00000227295	ELL2P1	78.2081	-3.52637	0.421217	-8.37187	5.67125e-17	4.83736e-15
ENSG00000269374		341.262	-3.33241	0.398451	-8.3634	6.09383e-17	5.18814e-15
ENSG00000256616		76.0094	-3.57653	0.427778	-8.36071	6.23402e-17	5.28783e-15
ENSG00000204103	MAFB	3832.67	-2.98813	0.357393	-8.36093	6.22277e-17	5.28783e-15
ENSG00000183648	NDUFB1	3105	-1.87594	0.224408	-8.3595	6.29838e-17	5.33255e-15
ENSG00000213026		22.9862	-4.84942	0.580536	-8.35335	6.63531e-17	5.60745e-15
ENSG00000143198	MGST3	5933.52	-1.64124	0.196501	-8.35233	6.69266e-17	5.6455e-15
ENSG00000255220	DDX18P5	30.8135	-4.45572	0.533559	-8.35095	6.77157e-17	5.70156e-15
ENSG00000196670	ZFP62	1652.97	-2.59432	0.310745	-8.34871	6.90154e-17	5.80033e-15
ENSG00000170473	PYM1	1482.47	-2.04748	0.245268	-8.34795	6.94595e-17	5.82696e-15
ENSG00000213234	ST13P1	32.9366	-5.59584	0.670352	-8.34762	6.9651e-17	5.83234e-15
ENSG00000232060	SLC4A1APP1	131.605	-3.02849	0.362826	-8.34697	7.00391e-17	5.85414e-15
ENSG00000284442	MIR211	2.0818	-4.43952	0.531942	-8.34588	7.06869e-17	5.89752e-15
ENSG00000114988		1809.13	-2.24925	0.269697	-8.33992	7.43391e-17	6.19096e-15
ENSG00000254013	MAP2K1P1	56.1874	-3.84252	0.460771	-8.33932	7.47174e-17	6.21117e-15
ENSG00000226268		146.137	-3.06876	0.368027	-8.33841	7.52965e-17	6.24797e-15
ENSG00000280238		11.2381	-4.38397	0.525771	-8.33817	7.54477e-17	6.2492e-15
ENSG00000278970	HEIH	3100.29	-1.88382	0.226356	-8.32238	8.62113e-17	7.115e-15
ENSG00000203950	RTL8A	1183.54	-2.09523	0.251757	-8.32245	8.6166e-17	7.115e-15
ENSG00000239437	RN7SL752P	25.0029	-8.42927	1.01297	-8.32136	8.69632e-17	7.16414e-15
ENSG00000229097	CALM2P2	477.046	-3.99951	0.480699	-8.32019	8.78204e-17	7.22177e-15
ENSG00000232260	BTF3L4P1	28.6428	-4.38474	0.527081	-8.31892	8.877e-17	7.28678e-15
ENSG00000235560		111.844	-2.47187	0.297191	-8.31746	8.9871e-17	7.35703e-15
ENSG00000231245	C1DP1	199.125	-2.76729	0.332712	-8.31736	8.99471e-17	7.35703e-15
ENSG00000178307	TMEM11	1156.96	-1.48221	0.178216	-8.31692	9.02799e-17	7.37109e-15
ENSG00000213790	OLA1P1	103.691	-2.35928	0.283803	-8.31309	9.3244e-17	7.59955e-15
ENSG00000261620	HMGN2P41	23.5242	-4.66888	0.561689	-8.31221	9.39336e-17	7.64216e-15
ENSG00000173141	MRPL57	2757.46	-1.55483	0.187126	-8.30902	9.64981e-17	7.823e-15
ENSG00000127184	COX7C	12520.1	-1.87913	0.226151	-8.30919	9.63548e-17	7.823e-15
ENSG00000151093	OXSM	528.338	-2.03982	0.245586	-8.30591	9.90567e-17	8.01624e-15
ENSG00000183621	ZNF438	930.824	-2.50812	0.301976	-8.30568	9.925e-17	8.01772e-15
ENSG00000267076	MIX23P3	31.8936	-3.62201	0.436272	-8.30219	1.02214e-16	8.24261e-15
ENSG00000280060		46.575	-2.88325	0.347314	-8.30156	1.02749e-16	8.27124e-15
ENSG00000182722	SEPHS1P1	25.8717	-4.94945	0.596254	-8.3009	1.03322e-16	8.30277e-15
ENSG00000178397	FAM22A	1216.12	-1.9121	0.230398	-8.29911	1.04897e-16	8.41458e-15
ENSG00000241020	RPL32P24	9.04293	-3.54809	0.427599	-8.29769	1.06152e-16	8.50031e-15
ENSG00000213707	HMGB1P1	487.358	-2.99254	0.360677	-8.29702	1.06756e-16	8.52141e-15
ENSG00000162517	PEF1	6514.88	-1.7589	0.211993	-8.29698	1.06787e-16	8.52141e-15
ENSG00000256293	ATP6V1E1P3	95.69	-3.21896	0.388053	-8.29516	1.08442e-16	8.63841e-15
ENSG00000184831	APOO	708.579	-1.757	0.211846	-8.29375	1.09737e-16	8.72637e-15
ENSG00000258102	MAP1LC3B2	314.024	-2.33826	0.281956	-8.293	1.10428e-16	8.76611e-15
ENSG00000136247	ZDHHC4	3217.99	-1.49761	0.180632	-8.2909	1.12395e-16	8.90679e-15
ENSG00000220749	RPL21P28	2122.53	-2.28162	0.27524	-8.28957	1.13657e-16	8.9913e-15
ENSG00000230823	CBX1P1	19.3888	-4.38686	0.529288	-8.28823	1.14942e-16	9.07723e-15
ENSG00000163382		3062.04	-1.28175	0.154653	-8.28788	1.15289e-16	9.08902e-15
ENSG00000164442	CITED2	10013.1	-3.02048	0.364661	-8.28298	1.20128e-16	9.44602e-15
ENSG00000253954	HMGN1P38	324.302	-2.08252	0.251424	-8.28288	1.2023e-16	9.44602e-15
ENSG00000240375	VPS26AP1	20.4716	-3.5878	0.433247	-8.28119	1.21952e-16	9.56491e-15
ENSG00000255444	CYCSP27	4.2513	-5.68749	0.686841	-8.28064	1.22511e-16	9.59228e-15
ENSG00000233588	CYP51A1P2	90.86	-3.41321	0.412202	-8.28043	1.22728e-16	9.59287e-15
ENSG00000196659	TTC3B	845.563	-2.381	0.287564	-8.27991	1.23274e-16	9.61912e-15
ENSG00000275259	MIR6511A1	2.02321	-4.73389	0.571773	-8.27933	1.23875e-16	9.64961e-15
ENSG00000243015	RN7SL737P	4.83185	-3.90121	0.471232	-8.27875	1.24474e-16	9.67985e-15
ENSG00000266648	SETP3	26.3646	-3.98297	0.481241	-8.27646	1.26887e-16	9.85072e-15
ENSG00000177946	CENPBD1	817.842	-1.9918	0.240729	-8.27406	1.29477e-16	1.00348e-14
ENSG00000213683		69.5562	-3.62986	0.438894	-8.27047	1.33427e-16	1.03234e-14
ENSG00000157680	DGKI	2048.15	-4.41136	0.533662	-8.26621	1.38282e-16	1.06811e-14
ENSG00000240729		12.9192	-5.78949	0.700582	-8.26383	1.41076e-16	1.08603e-14
ENSG00000230793	SMARCE1P5	77.3072	-4.14167	0.501175	-8.26393	1.40957e-16	1.08603e-14
ENSG00000253869	PIGFP1	38.9705	-4.43036	0.536199	-8.26252	1.42631e-16	1.09615e-14
ENSG00000100804	PSMB5	3562.65	-1.6775	0.203058	-8.26117	1.44256e-16	1.10678e-14
ENSG00000246560	UBE2D3-AS1	69.0721	-2.29732	0.278161	-8.25895	1.46958e-16	1.12563e-14
ENSG00000149357	LAMTOR1	3225.16	-1.76256	0.213443	-8.25774	1.48455e-16	1.1352e-14
ENSG00000125356	NDUFA1	5043.78	-1.70699	0.20674	-8.2567	1.49754e-16	1.14322e-14
ENSG00000249741		83.0646	-3.20175	0.387915	-8.25375	1.53497e-16	1.16985e-14
ENSG00000213553	RPLPP6	8343.78	-2.83936	0.344084	-8.25192	1.55867e-16	1.18594e-14
ENSG00000250317	SMIM2	1657.52	-1.78097	0.215884	-8.24966	1.58841e-16	1.20656e-14
ENSG00000235805	SOCS5P3	4.50185	-6.24099	0.756642	-8.24828	1.60688e-16	1.21857e-14
ENSG00000163788	SNRK	1111.54	-3.65447	0.44307	-8.24806	1.60993e-16	1.21886e-14
ENSG00000113389	NPR3	735.586	-3.71011	0.449874	-8.24701	1.62401e-16	1.2275e-14
ENSG00000284143	MIR47	2.72382	-4.40391	0.53423	-8.24347	1.67282e-16	1.2623e-14
ENSG00000106355	LSM5	1504.27	-1.87607	0.227608	-8.24258	1.68531e-16	1.26964e-14
ENSG00000104886	PLEKHJ1	1006.96	-1.9521	0.236941	-8.23878	1.73978e-16	1.30852e-14
ENSG00000205352	PRR13	1806.11	-2.55108	0.309748	-8.23597	1.78107e-16	1.33738e-14
ENSG00000213235	EEF1A1P16	1130.08	-5.36366	0.651445	-8.23348	1.81853e-16	1.36327e-14
ENSG00000258640	RPL21P5	9.56839	-5.52413	0.670993	-8.23277	1.82926e-16	1.36908e-14
ENSG00000271676		10.9776	-4.01864	0.488194	-8.23164	1.84666e-16	1.37984e-14
ENSG00000055950	MRPL43	2419.91	-1.94664	0.236491	-8.23137	1.85085e-16	1.38072e-14
ENSG00000232460	BMPR1AP2	123.456	-3.81805	0.463913	-8.23011	1.87046e-16	1.39308e-14
ENSG00000273192		313.699	-2.73726	0.332638	-8.22893	1.88894e-16	1.40456e-14
ENSG00000100865	CINP	1283.11	-1.89799	0.230674	-8.22802	1.90336e-16	1.41299e-14
ENSG00000238103	RPL9P7	10007.4	-2.40061	0.29182	-8.22634	1.93026e-16	1.43064e-14
ENSG00000276675		3.0176	-4.32683	0.52599	-8.22607	1.9346e-16	1.43155e-14
ENSG00000214552	COPS8P2	104.633	-3.23844	0.393799	-8.22358	1.9751e-16	1.45915e-14
ENSG00000182890	GLUD2	502.121	-3.65315	0.444269	-8.22283	1.98753e-16	1.46597e-14
ENSG00000133121	STARD13	2778.86	-2.76408	0.336168	-8.22232	1.99596e-16	1.46982e-14
ENSG00000175203	DCTN2	3790.18	-1.73236	0.210706	-8.22168	2.00675e-16	1.4754e-14
ENSG00000103202	NME4	2224.71	-1.79702	0.218588	-8.22102	2.01773e-16	1.48109e-14
ENSG00000266472	MRPS21	4206.01	-1.76197	0.214346	-8.2202	2.03171e-16	1.48897e-14
ENSG00000144158	SNRPA1P1	126.585	-2.45008	0.298103	-8.2189	2.05372e-16	1.50269e-14
ENSG00000170315	UBB	22981.8	-2.13065	0.25926	-8.21818	2.06615e-16	1.50937e-14
ENSG00000232838	PET117	470.085	-2.03683	0.247867	-8.21743	2.07912e-16	1.51643e-14
ENSG00000258315	C17orf49	567.898	-2.98597	0.363393	-8.21692	2.08798e-16	1.52048e-14
ENSG00000281087		119.475	-4.57088	0.556295	-8.21665	2.09269e-16	1.52149e-14
ENSG00000229562	ZFYVE9P1	43.7859	-4.67982	0.56962	-8.21569	2.10955e-16	1.53131e-14
ENSG00000244716		6803.15	-2.0818	0.253451	-8.21382	2.14253e-16	1.55279e-14
ENSG00000168002	POLR2G	2376.34	-1.76288	0.214663	-8.21236	2.16892e-16	1.56943e-14
ENSG00000283429	MIR1244-3	228.879	-3.70216	0.450852	-8.21148	2.18486e-16	1.57848e-14
ENSG00000170860	LSM3	2617.89	-1.75836	0.21414	-8.21126	2.18874e-16	1.57879e-14
ENSG00000235082	SUMO1P3	171.165	-4.01984	0.489596	-8.21054	2.20204e-16	1.58589e-14
ENSG00000163864	NMNAT3	412.644	-2.43042	0.296065	-8.20907	2.22908e-16	1.60284e-14
ENSG00000242485	MRPL2	3751.07	-1.77135	0.215797	-8.20843	2.24094e-16	1.60884e-14
ENSG00000277363	SRCIN1	364.092	6.73073	0.820165	8.20656	2.27619e-16	1.63159e-14
ENSG00000165795	NDRG2	3035.47	-2.2753	0.277287	-8.20557	2.29495e-16	1.63991e-14
ENSG00000237749		737.056	-5.20093	0.633824	-8.20564	2.29362e-16	1.63991e-14
ENSG00000100814	CCNB1IP1	2830.53	-1.98483	0.241956	-8.20328	2.33925e-16	1.66895e-14
ENSG00000226253	MRPL35P3	11.7941	-4.15555	0.506722	-8.20085	2.38699e-16	1.70037e-14
ENSG00000223723	TFDP1P2	50.8169	-3.46616	0.422704	-8.19998	2.40418e-16	1.70995e-14
ENSG00000188938	FAM12AOS	2861.8	-2.15334	0.262624	-8.19934	2.41704e-16	1.71643e-14
ENSG00000226784	PGAM4	229.815	-2.34507	0.286036	-8.1985	2.43413e-16	1.7259e-14
ENSG00000223803	RPS2P14	1748.56	-3.78325	0.461501	-8.19771	2.45001e-16	1.73447e-14
ENSG00000141642	ELAC1	786.669	-2.02562	0.247167	-8.19535	2.49871e-16	1.76622e-14
ENSG00000264940	SNORD3C	75.079	-5.7213	0.698195	-8.19441	2.51823e-16	1.77727e-14
ENSG00000252561	RNU1-125P	2.88074	-4.44972	0.543108	-8.19306	2.5466e-16	1.79453e-14
ENSG00000273041	ATF4P2	18.652	-5.14354	0.627873	-8.19201	2.56909e-16	1.8076e-14
ENSG00000213866	YBX1P1	767.968	-3.2405	0.395638	-8.19056	2.60007e-16	1.82659e-14
ENSG00000225976	CKS1BP2	37.9295	-2.81851	0.34413	-8.19024	2.60712e-16	1.82873e-14
ENSG00000244021		1930.67	-2.2382	0.273328	-8.18869	2.64081e-16	1.84953e-14
ENSG00000230037	UBBP1	252.528	-5.27043	0.643708	-8.18762	2.66444e-16	1.86323e-14
ENSG00000272288	ILRUN-AS1	169.28	-1.92939	0.235705	-8.1856	2.70946e-16	1.89183e-14
ENSG00000209582	SNORA48	2.62503	-4.39783	0.537291	-8.18519	2.71871e-16	1.8954e-14
ENSG00000237774		31.6204	-5.09401	0.622517	-8.18292	2.77043e-16	1.92852e-14
ENSG00000166455	C16orf46	207.929	-3.60111	0.440097	-8.18254	2.77913e-16	1.93164e-14
ENSG00000274828		249.026	-2.54483	0.311063	-8.18107	2.81343e-16	1.95252e-14
ENSG00000178660	ARMC1P1	173.383	-2.91091	0.355843	-8.18033	2.83065e-16	1.9615e-14
ENSG00000223459	TCAF1P1	55.6537	19.7125	2.41032	8.17836	2.87738e-16	1.99087e-14
ENSG00000275400		457.993	-2.61008	0.31916	-8.17797	2.88676e-16	1.99435e-14
ENSG00000231822	SMC3P1	208.881	-3.05831	0.374218	-8.17253	3.01983e-16	2.08313e-14
ENSG00000113312	TTC1	2894.6	-1.6742	0.204893	-8.17111	3.05571e-16	2.10472e-14
ENSG00000231035	RPL7L1P9	8.81918	-4.53014	0.554542	-8.16917	3.10515e-16	2.13556e-14
ENSG00000233837	EIF3LP2	473.447	-4.26377	0.521955	-8.16883	3.11393e-16	2.13839e-14
ENSG00000253899		195.441	-4.80977	0.588836	-8.16827	3.12845e-16	2.14514e-14
ENSG00000110801	PSMD9	1693.2	-1.64957	0.20196	-8.16779	3.14079e-16	2.15039e-14
ENSG00000148057	IDNK	370.576	-2.41235	0.295356	-8.16761	3.14558e-16	2.15045e-14
ENSG00000131143	COX4I1	9214.78	-1.63007	0.199886	-8.15502	3.49128e-16	2.38323e-14
ENSG00000225137	DYNC1I2P1	940.531	-2.89317	0.354807	-8.15421	3.51474e-16	2.39567e-14
ENSG00000251411		84.3923	-3.59275	0.44067	-8.15291	3.55261e-16	2.41789e-14
ENSG00000224334		25.4417	-5.43457	0.66662	-8.15242	3.56703e-16	2.4241e-14
ENSG00000167272	POP5	1182.77	-1.97253	0.241968	-8.15201	3.57915e-16	2.42873e-14
ENSG00000203876	ADD3-AS1	38.2068	-3.59693	0.441245	-8.15178	3.58607e-16	2.42983e-14
ENSG00000243697		25.1662	-5.60705	0.687947	-8.15041	3.62707e-16	2.45398e-14
ENSG00000136930	PSMB7	4520.63	-1.55595	0.19091	-8.15019	3.63358e-16	2.45476e-14
ENSG00000226361	TERF1P5	24.975	-4.07533	0.500117	-8.14875	3.67694e-16	2.48039e-14
ENSG00000243147	MRPL33	2005.56	-1.72395	0.21158	-8.14797	3.70078e-16	2.49068e-14
ENSG00000151353	TMEM18	1572.74	-2.01789	0.247663	-8.14775	3.70767e-16	2.49068e-14
ENSG00000242661	RPS3AP43	78.184	-5.32039	0.652991	-8.14772	3.70851e-16	2.49068e-14
ENSG00000233994	GDI2P2	175.324	-4.06659	0.499124	-8.14745	3.7168e-16	2.4926e-14
ENSG00000178723	GLULP4	127.341	-5.21378	0.640238	-8.1435	3.84015e-16	2.57155e-14
ENSG00000230457	PA2G4P4	254.35	-3.12835	0.384267	-8.14109	3.91733e-16	2.61941e-14
ENSG00000165629	ATP5F1C	9247.89	-1.46552	0.180055	-8.1393	3.97555e-16	2.65446e-14
ENSG00000164743	C8orf48	194.508	-2.36656	0.290783	-8.13859	3.99923e-16	2.66639e-14
ENSG00000072849	DERL2	2809.22	-2.0229	0.248604	-8.13703	4.05105e-16	2.69701e-14
ENSG00000112167	SAYSD1	1145.03	-1.83724	0.225817	-8.13595	4.08725e-16	2.71639e-14
ENSG00000197448	GSTK1	7132.77	-1.53692	0.188908	-8.13581	4.09202e-16	2.71639e-14
ENSG00000100104	SRRD	2039.78	-2.10909	0.259257	-8.13511	4.11548e-16	2.72801e-14
ENSG00000171368	TPPP	993.466	-3.22611	0.396591	-8.13461	4.13275e-16	2.7355e-14
ENSG00000259924		42.8684	-3.35925	0.412968	-8.1344	4.13979e-16	2.73621e-14
ENSG00000196704	AMZ2	2990.31	-1.70202	0.209275	-8.13292	4.19065e-16	2.76583e-14
ENSG00000167863	ATP5PD	7821.36	-1.5132	0.186094	-8.13137	4.24464e-16	2.79341e-14
ENSG00000254502	FNTAP1	81.09	-3.90454	0.480224	-8.13067	4.26929e-16	2.80561e-14
ENSG00000198680	TUSC1	958.568	-1.98161	0.24377	-8.129	4.32851e-16	2.84044e-14
ENSG00000199683	RN7SKP185	9.08124	-8.09727	0.99622	-8.128	4.36438e-16	2.85989e-14
ENSG00000132432	SEC61G	2697.02	-1.84716	0.227283	-8.12715	4.39498e-16	2.87583e-14
ENSG00000214748		7.00974	-5.07964	0.625082	-8.12636	4.42386e-16	2.89059e-14
ENSG00000176896	TCEANC	245.1	-2.45184	0.301727	-8.12602	4.43618e-16	2.89451e-14
ENSG00000180574	EIF2S3B	515.339	-3.31942	0.408571	-8.12447	4.49334e-16	2.92764e-14
ENSG00000143149	ALDH9A1	11344.7	-1.95111	0.240188	-8.12327	4.53799e-16	2.95253e-14
ENSG00000228992	RPL5P32	2.4505	-5.35557	0.65932	-8.12287	4.55287e-16	2.9545e-14
ENSG00000137720	C11orf1	1031.65	-1.8645	0.229538	-8.12284	4.55393e-16	2.9545e-14
ENSG00000114902	SPCS1	5728.43	-1.7103	0.21062	-8.12033	4.64913e-16	3.01201e-14
ENSG00000198585	NUDT16	1824.87	-2.58099	0.317856	-8.12001	4.66127e-16	3.0156e-14
ENSG00000163528	CHCHD4	800.558	-1.43592	0.176854	-8.11924	4.69113e-16	3.03064e-14
ENSG00000124172	ATP5F1E	13659.8	-1.62448	0.200087	-8.11888	4.70522e-16	3.03546e-14
ENSG00000237226	RPS3AP39	9.44213	-5.9536	0.733347	-8.1184	4.72364e-16	3.04306e-14
ENSG00000231989	PPP1R2B	163.055	-2.87191	0.353828	-8.11669	4.79066e-16	3.0819e-14
ENSG00000274230		14.4458	-4.00807	0.493902	-8.1151	4.85376e-16	3.11812e-14
ENSG00000231341	VDAC1P6	67.9247	-3.05728	0.376814	-8.1135	4.9184e-16	3.15522e-14
ENSG00000204388	HSPA1B	1555.26	-3.49588	0.430911	-8.11277	4.94767e-16	3.16955e-14
ENSG00000270987		25.8269	-3.69038	0.454899	-8.11252	4.95793e-16	3.17125e-14
ENSG00000236829		105.414	-3.54134	0.436536	-8.11237	4.96417e-16	3.17125e-14
ENSG00000004866	ST7	2030.44	-1.75665	0.216549	-8.112	4.97927e-16	3.17647e-14
ENSG00000240674		287.704	-4.24665	0.523577	-8.11084	5.02692e-16	3.20241e-14
ENSG00000240048	DDX5P2	62.2059	-4.02504	0.496302	-8.11006	5.0596e-16	3.21875e-14
ENSG00000250989		7.42732	-4.22202	0.520864	-8.10581	5.23967e-16	3.32868e-14
ENSG00000284985		25.2644	-4.57196	0.564136	-8.10436	5.3026e-16	3.36399e-14
ENSG00000235613	NSRP1P1	40.1999	-4.45494	0.5498	-8.10283	5.36935e-16	3.39693e-14
ENSG00000272086	GOLPH3-DT	104.043	-1.97884	0.244215	-8.10284	5.36896e-16	3.39693e-14
ENSG00000279423		426.526	-1.96018	0.241926	-8.10241	5.3881e-16	3.40409e-14
ENSG00000203666	EFCAB2	809.705	-2.83705	0.350746	-8.08861	6.03494e-16	3.8075e-14
ENSG00000132254	ARFIP2	2237.94	-2.10308	0.260022	-8.0881	6.0604e-16	3.8183e-14
ENSG00000233270	SNRPEP4	291.406	-1.694	0.209522	-8.08508	6.2121e-16	3.9085e-14
ENSG00000245205	EEF1A1P4	1528.3	-4.95975	0.613559	-8.08357	6.28961e-16	3.95184e-14
ENSG00000258500		6.86422	-6.41352	0.793425	-8.08334	6.30182e-16	3.95396e-14
ENSG00000283867	MIR137	8.29188	-4.45235	0.550816	-8.08317	6.31024e-16	3.95396e-14
ENSG00000258741	H2AZ2P1	110.561	-2.48763	0.307936	-8.0784	6.56232e-16	4.10629e-14
ENSG00000146425	DYNLT1	4254.34	-2.00612	0.248347	-8.0779	6.58938e-16	4.1176e-14
ENSG00000277785	SNORD116-21	2.65906	-4.3597	0.539751	-8.07725	6.62422e-16	4.13373e-14
ENSG00000215414	PSMA6P1	399.236	-3.2721	0.405133	-8.07661	6.65932e-16	4.14994e-14
ENSG00000260274		211.449	-2.2987	0.284618	-8.07644	6.66832e-16	4.14994e-14
ENSG00000221883	ARIH2OS	137.142	-2.14343	0.265599	-8.07016	7.02089e-16	4.36343e-14
ENSG00000175768	TOMM5	2382.07	-2.17208	0.269171	-8.06953	7.05686e-16	4.37984e-14
ENSG00000203778	FAM229B	1136.12	-1.89659	0.235056	-8.0687	7.10483e-16	4.40365e-14
ENSG00000226427	HMGN2P7	33.5056	-6.06137	0.751344	-8.06737	7.18262e-16	4.44585e-14
ENSG00000215895	HSPA5P1	722.755	-5.4701	0.678095	-8.06687	7.2124e-16	4.45826e-14
ENSG00000254939		4.54628	-5.81667	0.72138	-8.06326	7.42886e-16	4.58587e-14
ENSG00000269907	PTMAP11	104.004	-4.80774	0.596366	-8.06173	7.52207e-16	4.63716e-14
ENSG00000126756	UXT	2790.25	-1.44705	0.179538	-8.05988	7.637e-16	4.70168e-14
ENSG00000229256	ST13P13	68.3768	-4.25588	0.528144	-8.05817	7.74423e-16	4.7613e-14
ENSG00000284117	MIR6883	2.58879	-4.58426	0.569029	-8.05629	7.8646e-16	4.82882e-14
ENSG00000260053	ABCB1P4	3.4619	-3.97394	0.493373	-8.05463	7.97169e-16	4.88369e-14
ENSG00000123144	TRIR	3999.39	-2.1194	0.26313	-8.05458	7.97528e-16	4.88369e-14
ENSG00000271380		150.009	-2.98808	0.371029	-8.05349	8.0467e-16	4.92084e-14
ENSG00000181924	COA4	2333.36	-1.57506	0.195596	-8.0526	8.10514e-16	4.94997e-14
ENSG00000124399	NDUFB4P12	172.724	-3.87068	0.480717	-8.05188	8.1531e-16	4.97263e-14
ENSG00000143553		1169.46	-1.70036	0.211221	-8.05014	8.26972e-16	5.03705e-14
ENSG00000122490	SLC66A2	2203.67	-2.04454	0.254033	-8.04829	8.39568e-16	5.10698e-14
ENSG00000172586	CHCHD1	1997.35	-1.63902	0.203675	-8.04725	8.46718e-16	5.14364e-14
ENSG00000279660		34.7302	-3.75312	0.466414	-8.04675	8.50198e-16	5.15112e-14
ENSG00000276855		752.826	-1.91371	0.23782	-8.04689	8.49255e-16	5.15112e-14
ENSG00000176595	KBTBD11	226.556	-2.57266	0.319747	-8.04591	8.56077e-16	5.17989e-14
ENSG00000226360	RPL1AP6	2510.57	-3.6265	0.450831	-8.04403	8.69321e-16	5.25308e-14
ENSG00000233868	LLPHP3	52.5694	-3.42062	0.425316	-8.04252	8.80065e-16	5.311e-14
ENSG00000185222	TCEAL9	3789.93	-2.08425	0.25916	-8.04231	8.81592e-16	5.31322e-14
ENSG00000243538	RPS26P28	81.6662	-4.08586	0.508315	-8.03804	9.12886e-16	5.49459e-14
ENSG00000112335	SNX3	6191.12	-1.88187	0.234206	-8.0351	9.35006e-16	5.62034e-14
ENSG00000229186	ADAM1A	37.8121	-3.51637	0.437797	-8.03195	9.59347e-16	5.75453e-14
ENSG00000116096	SPR	1409.12	-1.69984	0.211636	-8.03189	9.59841e-16	5.75453e-14
ENSG00000250030		12.2501	-4.91676	0.612169	-8.03171	9.61239e-16	5.75537e-14
ENSG00000176410	DNAJC3	1519.17	-1.60036	0.199299	-8.02997	9.74976e-16	5.83e-14
ENSG00000283621	MIR6759	2.24402	-4.93949	0.615168	-8.0295	9.78727e-16	5.8448e-14
ENSG00000237248	LINC987	200.358	-3.12493	0.389261	-8.02787	9.91819e-16	5.91527e-14
ENSG00000184983	NDUFA6	456.036	-1.9083	0.237743	-8.02673	1.00102e-15	5.96238e-14
ENSG00000081870		1991.33	-2.41817	0.301279	-8.02635	1.00417e-15	5.9734e-14
ENSG00000198841	KTI12	531.514	-2.13844	0.266482	-8.02471	1.01766e-15	6.04579e-14
ENSG00000214980		7.22024	-5.05079	0.629432	-8.02436	1.02055e-15	6.05511e-14
ENSG00000274818		35.134	-3.00629	0.374777	-8.02154	1.04432e-15	6.18807e-14
ENSG00000180764	PIPSL	335.035	-3.69822	0.46109	-8.02061	1.05225e-15	6.22702e-14
ENSG00000282961	PRNCR1	357.267	-3.2165	0.401104	-8.01911	1.06512e-15	6.29509e-14
ENSG00000200121	Y_RNA	3.4442	-4.41957	0.551221	-8.01778	1.07673e-15	6.35549e-14
ENSG00000160221	GATD3A	1513.61	-1.96329	0.244873	-8.01758	1.07848e-15	6.35763e-14
ENSG00000253330		29.7491	-4.49877	0.561196	-8.0164	1.08892e-15	6.41094e-14
ENSG00000251913	RNU6-513P	3.00513	-4.44415	0.554478	-8.01502	1.10115e-15	6.47458e-14
ENSG00000240857	RDH14	1270.47	-1.74001	0.217103	-8.01465	1.10455e-15	6.48628e-14
ENSG00000233846	SELENOTP1	199.688	-3.49009	0.435478	-8.01437	1.10704e-15	6.48638e-14
ENSG00000164258	NDUFS4	2490.78	-1.35789	0.169432	-8.01433	1.1074e-15	6.48638e-14
ENSG00000224437	PIGUP1	34.7374	-2.55907	0.319561	-8.0081	1.16495e-15	6.81472e-14
ENSG00000259100	COILP1	23.1856	-4.34206	0.542318	-8.00648	1.18038e-15	6.89619e-14
ENSG00000100612	DHRS7	5618.18	-1.8584	0.232121	-8.00617	1.18339e-15	6.89693e-14
ENSG00000147224	PRPS1	2535.63	-2.08166	0.260007	-8.00615	1.18352e-15	6.89693e-14
ENSG00000189077	TMEM12A	1223.38	-1.35407	0.16915	-8.00519	1.19281e-15	6.94226e-14
ENSG00000235378	MRPS1P1	8.13565	-5.45951	0.68201	-8.00503	1.19433e-15	6.94229e-14
ENSG00000241061	RPL5P1	720.415	-4.29652	0.537022	-8.00064	1.23773e-15	7.18544e-14
ENSG00000167397	VKORC1	2481.44	-1.67875	0.209849	-7.9998	1.24617e-15	7.21614e-14
ENSG00000254449	SF3A3P2	70.6008	-4.47648	0.559569	-7.99987	1.24556e-15	7.21614e-14
ENSG00000227615		2533.69	-3.14868	0.393618	-7.99932	1.25111e-15	7.23557e-14
ENSG00000204308	RNF5	304.85	-1.93051	0.241369	-7.99818	1.2627e-15	7.28421e-14
ENSG00000250182	EEF1A1P13	11920.2	-4.07313	0.509252	-7.99826	1.26188e-15	7.28421e-14
ENSG00000137168	PPIL1	1825.81	-2.09205	0.26159	-7.99742	1.27056e-15	7.32033e-14
ENSG00000241923	RPL14P3	509.703	-4.36694	0.546064	-7.99712	1.27361e-15	7.32869e-14
ENSG00000214073	RPL21P17	14.0406	-5.60169	0.700718	-7.99422	1.30395e-15	7.49389e-14
ENSG00000173231	TERF1P1	11.116	-4.58608	0.573764	-7.99298	1.3172e-15	7.56051e-14
ENSG00000272606	PPP4R3B-DT	79.3949	-2.6445	0.330865	-7.99268	1.32034e-15	7.56906e-14
ENSG00000228451	SDAD1P1	274.811	-2.42228	0.303091	-7.99193	1.32838e-15	7.60564e-14
ENSG00000232389		172.272	-2.70946	0.33904	-7.99154	1.33259e-15	7.62024e-14
ENSG00000204954	C12orf73	375.413	-2.14255	0.268152	-7.99005	1.34886e-15	7.70363e-14
ENSG00000272941		62.7083	-3.70698	0.464042	-7.98846	1.36638e-15	7.79399e-14
ENSG00000125863	MKKS	2584.45	-1.73305	0.216953	-7.98815	1.36978e-15	7.80367e-14
ENSG00000155876	RRAGA	4941.41	-1.79829	0.225149	-7.98709	1.38163e-15	7.86141e-14
ENSG00000242952	RPSAP3	122.493	-4.91503	0.615475	-7.98574	1.39683e-15	7.93803e-14
ENSG00000175581	MRPL48	1207.08	-1.54347	0.19329	-7.98525	1.40237e-15	7.95964e-14
ENSG00000172247	C1QTNF4	14.231	16.897	2.11625	7.9844	1.41209e-15	8.00486e-14
ENSG00000277150	F8A3	600.748	-1.80374	0.225959	-7.98264	1.43239e-15	8.10989e-14
ENSG00000175324	LSM1	1464.02	-1.9942	0.249832	-7.98218	1.4377e-15	8.10993e-14
ENSG00000102897	LYRM1	1059.09	-2.4117	0.302129	-7.98235	1.43568e-15	8.10993e-14
ENSG00000234498	RPL13AP2	1066.72	-4.61619	0.578305	-7.98228	1.43649e-15	8.10993e-14
ENSG00000238222	MKRN4P	26.1556	-3.80916	0.477279	-7.98099	1.4516e-15	8.17827e-14
ENSG00000178127	NDUFV2	3613.81	-1.55552	0.194945	-7.97928	1.47185e-15	8.28213e-14
ENSG00000213516		1380.6	-2.59401	0.325178	-7.9772	1.49689e-15	8.41271e-14
ENSG00000233762		2591.17	-2.51057	0.314728	-7.97696	1.4998e-15	8.41875e-14
ENSG00000260382		7.47708	-6.21632	0.779365	-7.97614	1.50978e-15	8.45807e-14
ENSG00000136149	RPL13AP25	3524.2	-3.44232	0.43158	-7.97608	1.5105e-15	8.45807e-14
ENSG00000257511		358.246	-2.81773	0.353382	-7.97361	1.54106e-15	8.61867e-14
transcript:ENST00000390556		26.9821	20.7406	2.60193	7.97123	1.57098e-15	8.77525e-14
ENSG00000162076	FLYWCH2	1072.69	-1.5396	0.19315	-7.97103	1.57352e-15	8.77873e-14
ENSG00000156467	UQCRB	10733.1	-1.51543	0.190168	-7.96894	1.6004e-15	8.91787e-14
ENSG00000234618	RPSAP9	561.024	-3.25282	0.408283	-7.96709	1.62457e-15	9.04156e-14
ENSG00000182512	GLRX5	2276.17	-1.44975	0.182006	-7.9654	1.64693e-15	9.14373e-14
ENSG00000072506	HSD17B1	2762.01	-1.56646	0.196655	-7.9655	1.64552e-15	9.14373e-14
ENSG00000108826	MRPL27	1477.12	-1.84517	0.231709	-7.96331	1.67494e-15	9.28803e-14
ENSG00000161980	POLR3K	840.466	-1.37488	0.172656	-7.96311	1.67772e-15	9.29215e-14
ENSG00000283390		371.072	-2.82907	0.355296	-7.96256	1.68515e-15	9.31887e-14
ENSG00000230832	SSBL4P	77.0167	-3.91976	0.49228	-7.96245	1.68661e-15	9.31887e-14
ENSG00000284159	MIR394	3.87886	-4.10818	0.516084	-7.9603	1.71628e-15	9.47138e-14
ENSG00000224861	YBX1P1	1297.2	-2.74662	0.345136	-7.95808	1.7473e-15	9.63098e-14
ENSG00000276216		30.7723	-4.49384	0.564811	-7.95636	1.77167e-15	9.75357e-14
ENSG00000225008	TWF1P2	19.0358	-4.39149	0.552148	-7.95348	1.8135e-15	9.97186e-14
ENSG00000251503	CENPS-CORT	60.7582	-4.02492	0.506085	-7.95306	1.81961e-15	9.99343e-14
ENSG00000261524	ABCB1P3	4.01118	-3.95868	0.497928	-7.9503	1.86054e-15	1.0206e-13
ENSG00000130382	MLLT1	4564.42	-2.19932	0.276661	-7.94952	1.87241e-15	1.02588e-13
ENSG00000121073	SLC35B1	2455.29	-1.64816	0.207335	-7.94928	1.87602e-15	1.02663e-13
ENSG00000125971	DYNLRB1	5261.24	-1.65468	0.208204	-7.94739	1.90489e-15	1.04119e-13
ENSG00000133136	GNG5P2	86.1876	-4.36305	0.549267	-7.9434	1.9672e-15	1.07396e-13
ENSG00000235297	FAUP1	1180.4	-3.12587	0.393549	-7.94276	1.97727e-15	1.07818e-13
ENSG00000157181	ODR4	1160.97	-2.81349	0.354277	-7.94148	1.99777e-15	1.08806e-13
ENSG00000277604	Y_RNA	7.22803	-5.01381	0.631462	-7.94001	2.02162e-15	1.09974e-13
ENSG00000249014	HMGN2P4	187.025	-2.85527	0.359789	-7.93596	2.08865e-15	1.13486e-13
ENSG00000241741	RPL7AP3	1995.97	-3.00751	0.379026	-7.93484	2.1076e-15	1.1438e-13
ENSG00000186787	SPIN2B	211.318	-2.29619	0.289415	-7.93389	2.12388e-15	1.15127e-13
ENSG00000226049	TLK2P1	318.57	-3.12738	0.394214	-7.9332	2.13565e-15	1.15628e-13
ENSG00000134248	LAMTOR5	2638.24	-1.89225	0.238634	-7.9295	2.20029e-15	1.18987e-13
ENSG00000214319	CXADRP1	3.57828	-5.09199	0.642209	-7.92887	2.2115e-15	1.19312e-13
ENSG00000213727		4.44399	-4.19959	0.529653	-7.92894	2.21021e-15	1.19312e-13
ENSG00000229927	RHEBP1	528.645	-2.32246	0.292969	-7.92733	2.23905e-15	1.20556e-13
ENSG00000228474	OST4	5886.11	-1.87107	0.236029	-7.92729	2.23983e-15	1.20556e-13
ENSG00000251418	ASS1P8	5.90671	-6.47567	0.816946	-7.92668	2.25087e-15	1.21008e-13
ENSG00000217769		52.3516	-3.98639	0.503041	-7.92459	2.28909e-15	1.22919e-13
ENSG00000147059	SPIN2A	170.899	-2.17338	0.274295	-7.92352	2.30886e-15	1.23835e-13
ENSG00000226086	EIF3LP3	209.16	-4.46546	0.563615	-7.9229	2.32025e-15	1.24155e-13
ENSG00000143420	ENSA	8577.15	-1.77324	0.223808	-7.92303	2.31796e-15	1.24155e-13
ENSG00000177932	ZNF354C	1234.47	-2.60899	0.329321	-7.92235	2.33057e-15	1.24416e-13
ENSG00000132002	DNAJB1	6939.65	-2.65079	0.334594	-7.9224	2.32974e-15	1.24416e-13
ENSG00000271452		64.7704	-3.20785	0.404955	-7.9215	2.34664e-15	1.25129e-13
ENSG00000112081	SRSF3	8359.93	-2.39819	0.302783	-7.92047	2.3662e-15	1.26025e-13
ENSG00000275457		51.0949	-2.32386	0.293418	-7.91997	2.37561e-15	1.26379e-13
ENSG00000166529	ZSCAN21	570.687	-2.1469	0.271191	-7.91654	2.44217e-15	1.29769e-13
ENSG00000123562	MORF4L2	9438.32	-1.87286	0.236585	-7.91622	2.44845e-15	1.29953e-13
ENSG00000070087	PFN2	7204.18	-2.11412	0.267073	-7.91588	2.45503e-15	1.30151e-13
ENSG00000232004	CAP1P2	114.763	-3.47277	0.438746	-7.91523	2.46796e-15	1.30685e-13
ENSG00000166171	DPCD	898.276	-1.60155	0.202391	-7.91316	2.5093e-15	1.3272e-13
ENSG00000237828	PA2G4P1	59.4492	-3.76022	0.4752	-7.91293	2.514e-15	1.32816e-13
ENSG00000185115	NSMCE3	586.841	-1.87856	0.23741	-7.91272	2.51819e-15	1.32884e-13
ENSG00000139239	RPL14P1	5867.65	-2.76033	0.348856	-7.91252	2.52225e-15	1.32945e-13
ENSG00000161179	YDJC	513.07	-2.04618	0.258648	-7.91106	2.55197e-15	1.34357e-13
ENSG00000104325	DECR1	2685.35	-1.68732	0.213295	-7.91073	2.55887e-15	1.34411e-13
ENSG00000129187	DCTD	5225.69	-2.29647	0.290297	-7.91076	2.55827e-15	1.34411e-13
ENSG00000105171	POP4	1625.02	-1.48638	0.187938	-7.90887	2.59738e-15	1.36278e-13
ENSG00000147123	NDUFB11	5281.07	-1.38913	0.175697	-7.9064	2.64936e-15	1.38846e-13
ENSG00000244381	SDHDP3	60.554	-4.60124	0.581979	-7.90619	2.65386e-15	1.38923e-13
ENSG00000137100	DCTN3	2232.62	-1.69692	0.214637	-7.906	2.65785e-15	1.38973e-13
ENSG00000103591	AAGAB	2872.89	-1.95297	0.247063	-7.90472	2.68542e-15	1.40254e-13
ENSG00000259388		14.9909	-4.36317	0.552055	-7.9035	2.71182e-15	1.41472e-13
ENSG00000137547	MRPL15	1737.62	-1.59054	0.201255	-7.90308	2.72092e-15	1.41785e-13
ENSG00000180138	CSNK1A1L	37.6902	-4.48979	0.568437	-7.89848	2.82326e-15	1.469e-13
ENSG00000251013	GAPDHP62	62.6332	-3.3985	0.430278	-7.89838	2.8255e-15	1.469e-13
ENSG00000189227	C15orf61	545.987	-1.60618	0.203363	-7.89811	2.83166e-15	1.47054e-13
ENSG00000230667	SETSIP	127.894	-3.85205	0.487824	-7.89639	2.87095e-15	1.48925e-13
ENSG00000255993	PSMC1P9	101.343	-4.3925	0.556354	-7.89516	2.89945e-15	1.50233e-13
ENSG00000215349	MRPL3P1	189.394	-3.60565	0.456778	-7.89368	2.93415e-15	1.51688e-13
ENSG00000200278	RNA5SP352	2.07331	-5.17913	0.656106	-7.89374	2.93263e-15	1.51688e-13
ENSG00000178654	PPIAP33	6.74471	-3.52186	0.446251	-7.89211	2.97115e-15	1.53328e-13
ENSG00000202025	RNU6-124P	3.18515	-4.21794	0.534454	-7.89205	2.97256e-15	1.53328e-13
ENSG00000129625	REEP5	24198.9	-1.88423	0.238887	-7.88754	3.08213e-15	1.58801e-13
ENSG00000214366	EIF4EP5	26.3433	-5.99271	0.759827	-7.88694	3.09683e-15	1.592e-13
ENSG00000217289		31.9497	-3.39593	0.430569	-7.88707	3.0936e-15	1.592e-13
ENSG00000100632	ERH	5186.82	-2.07735	0.263482	-7.88421	3.16527e-15	1.62536e-13
ENSG00000170854	RIOX2	5802.67	-2.78788	0.353697	-7.88213	3.21859e-15	1.65089e-13
ENSG00000229072	HMGN2P24	14.4948	-5.62868	0.714162	-7.88152	3.23414e-15	1.65701e-13
ENSG00000240720	LRRD1	39.6169	-5.41112	0.686721	-7.87964	3.28316e-15	1.68024e-13
ENSG00000231389	HLA-DPA1	803.527	25.0712	3.18194	7.87922	3.29429e-15	1.68406e-13
ENSG00000215251	FASTKD5	1028.28	-1.79095	0.227337	-7.87795	3.32804e-15	1.69942e-13
ENSG00000230188		17.6194	-5.38192	0.683196	-7.87756	3.3384e-15	1.70281e-13
ENSG00000274655		2.36201	-4.82731	0.612861	-7.87668	3.36187e-15	1.71287e-13
ENSG00000257731		3.64792	-4.23349	0.537513	-7.87608	3.37807e-15	1.71921e-13
ENSG00000132010	ZNF2	499.689	-2.21862	0.281709	-7.87559	3.39151e-15	1.72222e-13
ENSG00000279557		64.6283	-4.5302	0.575216	-7.87564	3.39004e-15	1.72222e-13
ENSG00000186666	BCDIN3D	527.824	-2.04213	0.259311	-7.8752	3.40208e-15	1.72568e-13
ENSG00000147654	EBAG9	1958.41	-2.19234	0.278421	-7.87419	3.42952e-15	1.73767e-13
ENSG00000232736		14.3399	-7.08276	0.899977	-7.86994	3.54816e-15	1.7958e-13
ENSG00000125743	SNRPD2	5161.88	-1.8551	0.235783	-7.86784	3.60821e-15	1.82418e-13
ENSG00000248781	PSMC1P4	26.3542	-5.2122	0.662769	-7.86427	3.71267e-15	1.87492e-13
ENSG00000169490	TM2D2	2216.03	-2.16997	0.275964	-7.86324	3.74332e-15	1.88832e-13
ENSG00000277264	MIR6833	1.89966	-5.75624	0.732096	-7.86269	3.75986e-15	1.89457e-13
ENSG00000227525	RPL7P6	579.143	-5.14823	0.654808	-7.8622	3.77449e-15	1.89986e-13
ENSG00000143727	ACP1	2120.46	-2.07416	0.263843	-7.86133	3.80079e-15	1.91099e-13
ENSG00000237154	MCFD2P1	9.43071	-4.94561	0.629319	-7.85868	3.88211e-15	1.94914e-13
ENSG00000251669	FAM86EP	175.102	-2.16159	0.275061	-7.85858	3.88518e-15	1.94914e-13
transcript:ENST00000471857		24.791	19.7497	2.51449	7.85437	4.01785e-15	2.0135e-13
ENSG00000143222	UFC1	5133.23	-1.62708	0.207164	-7.85407	4.02738e-15	2.01607e-13
ENSG00000197557	TTC3A	960.047	-2.3746	0.30253	-7.84913	4.18931e-15	2.09484e-13
ENSG00000135390	ATP5MC2	7444.18	-1.43135	0.182414	-7.8467	4.27129e-15	2.1335e-13
ENSG00000234629	WDR82P1	18.0504	-3.8006	0.484425	-7.84558	4.30972e-15	2.15035e-13
ENSG00000143333	RGS16	6170.99	-3.14699	0.401158	-7.84477	4.33763e-15	2.15856e-13
ENSG00000104904	OAZ1	11727.5	-1.7405	0.22187	-7.84469	4.3403e-15	2.15856e-13
ENSG00000109180	OCIAD1	6861.62	-2.02098	0.257619	-7.84486	4.33441e-15	2.15856e-13
ENSG00000256073	URB1-AS1	389.252	-1.86962	0.238405	-7.84221	4.42683e-15	2.1992e-13
ENSG00000266373		51.215	-2.68298	0.342195	-7.8405	4.48758e-15	2.22697e-13
ENSG00000246203		105.815	-3.63225	0.463339	-7.83929	4.53095e-15	2.24605e-13
ENSG00000137806	NDUFAF1	938.766	-1.63143	0.208231	-7.83474	4.69805e-15	2.32637e-13
ENSG00000243431	RPL5P3	291.816	-4.58218	0.584904	-7.83408	4.72305e-15	2.33622e-13
ENSG00000277027	RMRP	132.191	-4.18517	0.534252	-7.8337	4.73718e-15	2.34069e-13
ENSG00000159199	ATP5MC1	2623.61	-1.70644	0.217867	-7.83246	4.78409e-15	2.36132e-13
ENSG00000267293		24.9021	-4.79473	0.61253	-7.82773	4.96739e-15	2.44916e-13
ENSG00000255547	RPA2P3	17.3694	-4.78902	0.611951	-7.82582	5.04362e-15	2.48406e-13
ENSG00000143363		1654.19	-2.84769	0.364013	-7.82304	5.15609e-15	2.53673e-13
ENSG00000132661	NXT1	751.616	-1.59677	0.204139	-7.82195	5.20103e-15	2.55609e-13
ENSG00000189089	RIMKLBP1	38.2487	-4.04366	0.516978	-7.82174	5.20994e-15	2.55773e-13
ENSG00000217414	DDX18P3	19.2375	-4.98731	0.637714	-7.82061	5.2568e-15	2.57797e-13
ENSG00000166311	SMPD1	1751.85	-1.9214	0.245791	-7.81718	5.40193e-15	2.64631e-13
ENSG00000089693	MLF2	8049.01	-1.3639	0.174487	-7.81661	5.42649e-15	2.6555e-13
ENSG00000199568	RNU5A-1	11.4099	-7.34395	0.939761	-7.81469	5.50981e-15	2.6934e-13
ENSG00000067842	ATP2B3	34.2641	20.8379	2.6667	7.81411	5.53513e-15	2.70289e-13
ENSG00000219200	RNASEK	2899.12	-2.0252	0.259195	-7.81341	5.56634e-15	2.71523e-13
ENSG00000259330	INAFM2	2962.09	-2.3841	0.305238	-7.81063	5.69032e-15	2.77276e-13
ENSG00000250966	H3P14	124.695	-4.94858	0.633621	-7.81	5.71879e-15	2.78367e-13
ENSG00000224217	PRPF4BP1	20.9556	-4.82872	0.618405	-7.80834	5.7945e-15	2.81753e-13
ENSG00000277283		310.4	-2.19956	0.281762	-7.80643	5.88292e-15	2.85749e-13
ENSG00000114383	TUSC2	2298.75	-1.58268	0.202745	-7.80626	5.89087e-15	2.85832e-13
ENSG00000264920	SP2-DT	236.012	-2.50791	0.321305	-7.8054	5.93118e-15	2.87483e-13
ENSG00000239014	SNORD18	2.31498	-4.28382	0.548976	-7.80329	6.03134e-15	2.92029e-13
ENSG00000277739	5_8S_rRNA	288.831	-5.05677	0.64818	-7.80149	6.1179e-15	2.95907e-13
ENSG00000241352		396.453	-4.58673	0.588036	-7.8001	6.18603e-15	2.98887e-13
ENSG00000159079	CFAP298	1796.13	-1.91833	0.246016	-7.79758	6.31076e-15	3.04431e-13
ENSG00000026297	RNASET2	3292.73	-2.1185	0.27169	-7.79751	6.31406e-15	3.04431e-13
ENSG00000164162	ANAPC1	498.296	-2.06639	0.265035	-7.79666	6.35665e-15	3.06162e-13
ENSG00000167740	CYB5D2	1487.08	-1.90779	0.244789	-7.79361	6.51192e-15	3.13311e-13
ENSG00000175741	RWDD4P2	220.132	-2.12243	0.272336	-7.79345	6.52035e-15	3.13387e-13
ENSG00000230911	PPIHP1	27.9932	-4.31496	0.553685	-7.79317	6.5348e-15	3.13752e-13
ENSG00000136522	MRPL47	1413.74	-1.53281	0.196699	-7.79267	6.56098e-15	3.1468e-13
ENSG00000152518	ZFP36L2	20209.3	-2.82182	0.362187	-7.79104	6.64584e-15	3.18417e-13
ENSG00000214558		213.209	-3.52711	0.452765	-7.79016	6.69247e-15	3.20315e-13
ENSG00000260549	MT1L	312.668	-2.8056	0.360288	-7.7871	6.85644e-15	3.27295e-13
ENSG00000258758		13.0115	-4.15977	0.5342	-7.78691	6.86689e-15	3.27295e-13
ENSG00000132541	RIDA	565.551	-1.85589	0.238331	-7.78703	6.8602e-15	3.27295e-13
ENSG00000184857	TMEM186	601.917	-1.72178	0.221106	-7.78714	6.85447e-15	3.27295e-13
ENSG00000267100	ILF3-DT	2249.8	-2.17984	0.279943	-7.78671	6.8774e-15	3.27456e-13
ENSG00000271181		9.3296	-4.68302	0.601429	-7.78648	6.89014e-15	3.27722e-13
ENSG00000184007		12471.1	-1.87573	0.240912	-7.78594	6.91944e-15	3.28774e-13
ENSG00000272143	FGF14-AS2	226.884	-2.57692	0.331107	-7.78272	7.09817e-15	3.36917e-13
ENSG00000279069		139.934	-2.96595	0.381106	-7.78247	7.11218e-15	3.37232e-13
ENSG00000168286	THAP11	1597.97	-1.77474	0.228049	-7.78229	7.12248e-15	3.37371e-13
ENSG00000248275	TRIM52-AS1	447.386	-1.98093	0.254577	-7.78127	7.18015e-15	3.39752e-13
ENSG00000150776	NKAPD1	1470.97	-2.24218	0.288162	-7.781	7.19548e-15	3.40126e-13
ENSG00000230319	TTLL1-AS1	39.468	-3.40957	0.438205	-7.78076	7.20901e-15	3.40414e-13
ENSG00000149646	CNBD2	38.7613	-4.05925	0.521774	-7.77971	7.26919e-15	3.42902e-13
ENSG00000238084		313.489	-2.11333	0.271704	-7.77805	7.36505e-15	3.47067e-13
ENSG00000284325	MIR3655	5.1622	-4.31017	0.554194	-7.77737	7.40474e-15	3.48578e-13
ENSG00000127922	SEM1	3865.39	-1.69077	0.217453	-7.77532	7.52565e-15	3.53906e-13
ENSG00000010626	LRRC23	592.434	-1.75968	0.226345	-7.77435	7.58364e-15	3.56268e-13
ENSG00000099341	PSMD8	5557.49	-1.32421	0.170337	-7.77406	7.60083e-15	3.56709e-13
ENSG00000186352	ANKRD37	538.105	-2.70174	0.347642	-7.77161	7.74919e-15	3.633e-13
ENSG00000091640	SPAG7	3440.34	-1.66595	0.214376	-7.77117	7.77622e-15	3.63822e-13
ENSG00000234118	RPL13AP6	370.616	-4.74037	0.609991	-7.77122	7.77351e-15	3.63822e-13
ENSG00000233155	HMGA1P8	22.0589	-3.31596	0.426752	-7.77023	7.83464e-15	3.65808e-13
ENSG00000169599	NFU1	1691.8	-1.69252	0.21782	-7.77028	7.83122e-15	3.65808e-13
ENSG00000220875	H3C9P	109.252	-4.97847	0.640725	-7.77005	7.84547e-15	3.65941e-13
ENSG00000249485	RBBP4P1	289.943	-2.70526	0.348185	-7.76959	7.87415e-15	3.66905e-13
ENSG00000241293	PPATP1	26.43	-3.0775	0.396123	-7.76904	7.90852e-15	3.68132e-13
ENSG00000112812	PRSS16	792.945	-2.56372	0.330054	-7.76756	8.00142e-15	3.72078e-13
ENSG00000242527		7.5373	-5.5026	0.708593	-7.76553	8.13025e-15	3.77686e-13
ENSG00000132561	MATN2	12149.2	-3.43653	0.442588	-7.76463	8.18838e-15	3.8e-13
ENSG00000179362	HMGN2P46	125.292	-4.42019	0.569302	-7.76422	8.21468e-15	3.80835e-13
ENSG00000106028	SSBP1	1719.14	-1.82909	0.235631	-7.76253	8.32527e-15	3.85572e-13
ENSG00000113558	SKP1	14248.2	-1.80779	0.232925	-7.76127	8.4082e-15	3.8902e-13
ENSG00000137714	FDX1	2411.68	-1.73283	0.223307	-7.75988	8.50131e-15	3.9293e-13
ENSG00000232713	RPS12P3	190.466	-4.81702	0.621049	-7.75627	8.74623e-15	4.03843e-13
ENSG00000022277	RTF2	3513.17	-1.78368	0.229999	-7.75516	8.823e-15	4.06978e-13
ENSG00000100568	VTI1B	7009.67	-1.71392	0.22105	-7.75353	8.93759e-15	4.11642e-13
ENSG00000213082	PPP1R14BP2	37.681	-2.92613	0.377397	-7.75346	8.9421e-15	4.11642e-13
ENSG00000214391	TUBAP2	387.282	-3.85238	0.496958	-7.75194	9.05e-15	4.16191e-13
ENSG00000117899	MESD	6215.85	-1.9665	0.253685	-7.75172	9.06563e-15	4.16492e-13
ENSG00000234737	KRT18P15	81.0635	-3.64822	0.470712	-7.75042	9.1588e-15	4.2035e-13
ENSG00000227311		111.622	-5.4682	0.705565	-7.7501	9.18171e-15	4.2098e-13
ENSG00000234171	RNASEH1-AS1	305.304	-2.06101	0.265972	-7.74897	9.26384e-15	4.24321e-13
ENSG00000228407		89.218	-4.74216	0.612053	-7.74796	9.33809e-15	4.27295e-13
ENSG00000252139		5.55152	-4.82188	0.622442	-7.74672	9.42931e-15	4.31038e-13
ENSG00000273885		2.87899	-4.49164	0.579917	-7.74531	9.53509e-15	4.35439e-13
ENSG00000175110	MRPS22	1540.05	-1.57895	0.203866	-7.74505	9.55455e-15	4.35893e-13
ENSG00000239219		38.674	-5.22819	0.675461	-7.74019	9.92721e-15	4.52444e-13
ENSG00000170412	GPRC5C	3872.02	-1.79951	0.232505	-7.73964	9.96962e-15	4.53925e-13
ENSG00000260405		3.71733	-5.37299	0.694273	-7.73901	1.00194e-14	4.55288e-13
ENSG00000250471	GMPSP1	117.52	-3.19111	0.412341	-7.73902	1.00187e-14	4.55288e-13
ENSG00000276311	MIR6511A3	1.84036	-4.4188	0.571044	-7.73812	1.00901e-14	4.58045e-13
ENSG00000183199	HSP9AB3P	1842.92	-3.92416	0.507147	-7.73772	1.01218e-14	4.5903e-13
ENSG00000173812	EIF1	21877.9	-1.82162	0.23545	-7.73675	1.01988e-14	4.62065e-13
ENSG00000141428	C18orf21	567.389	-1.87918	0.242924	-7.73565	1.02873e-14	4.65612e-13
ENSG00000145337	PYURF	5428.73	-1.6418	0.212243	-7.73546	1.03033e-14	4.65875e-13
ENSG00000134153	EMC7	3654.37	-1.43191	0.185118	-7.73511	1.03314e-14	4.66225e-13
ENSG00000228285	LYPLA2P1	27.6595	-2.54532	0.32906	-7.73513	1.03295e-14	4.66225e-13
ENSG00000231351	WBP1P1	277.749	-1.79692	0.232341	-7.73399	1.04227e-14	4.69884e-13
ENSG00000183055	FAM133CP	29.8337	-3.14476	0.406665	-7.73306	1.04994e-14	4.72873e-13
ENSG00000235720	GABPAP	198.282	-2.97531	0.384774	-7.73261	1.05365e-14	4.7408e-13
ENSG00000243705		9.08737	-6.58036	0.85106	-7.73196	1.05905e-14	4.76044e-13
ENSG00000145919	BOD1	3183.63	-1.76562	0.228363	-7.73163	1.06175e-14	4.76787e-13
ENSG00000167515	TRAPPC2L	1391.15	-1.54222	0.199477	-7.73135	1.06416e-14	4.77401e-13
ENSG00000170271	FAXDC2	2508.94	-2.3804	0.30794	-7.73007	1.0749e-14	4.8175e-13
ENSG00000242083	RPL7AP31	261.269	-4.09109	0.529266	-7.72975	1.07755e-14	4.82466e-13
ENSG00000176623	RMDN1	3097.09	-2.16032	0.279506	-7.72906	1.08342e-14	4.84618e-13
ENSG00000283821	MIR6875	2.32695	-4.04683	0.523595	-7.72894	1.08448e-14	4.84619e-13
ENSG00000124459	ZNF45	632.612	-2.32121	0.300387	-7.72742	1.0975e-14	4.89959e-13
ENSG00000235454	HAUS6P3	37.9415	-3.05371	0.395279	-7.72546	1.11451e-14	4.97071e-13
ENSG00000149600	COMMD7	3774.71	-1.58399	0.205067	-7.72426	1.12505e-14	5.01282e-13
ENSG00000164967	RPP25L	918.214	-1.43336	0.185615	-7.72222	1.1432e-14	5.08873e-13
ENSG00000245330		37.6263	-3.63773	0.471082	-7.72208	1.14451e-14	5.08962e-13
ENSG00000174306	ZHX3	2464.08	-2.55496	0.330917	-7.72086	1.1555e-14	5.13352e-13
ENSG00000284595	MIR6785	2.38255	-4.1088	0.532177	-7.72073	1.15666e-14	5.1337e-13
ENSG00000164919	COX6C	6723.54	-1.35944	0.17609	-7.7201	1.16237e-14	5.15135e-13
ENSG00000266993		54.3631	-3.70824	0.480339	-7.72004	1.16289e-14	5.15135e-13
ENSG00000229897	SEPTIN7P7	101.823	-4.81216	0.62352	-7.71773	1.18417e-14	5.24053e-13
ENSG00000236698		519.1	-2.29792	0.297837	-7.71536	1.20637e-14	5.33365e-13
ENSG00000261202	TNRC6B-DT	15.5318	-4.4682	0.579194	-7.71451	1.21451e-14	5.36445e-13
ENSG00000101363	MANBAL	3512.91	-1.64166	0.212819	-7.71388	1.22047e-14	5.38559e-13
ENSG00000150456	EEF1AKMT1	410.856	-1.89181	0.245281	-7.7128	1.23087e-14	5.42625e-13
ENSG00000224097		26.2991	-3.25211	0.421704	-7.71182	1.24032e-14	5.46267e-13
ENSG00000139567	ACVRL1	1038.84	-2.39807	0.31098	-7.71132	1.24526e-14	5.47914e-13
ENSG00000169371	SNUPN	976.714	-1.94097	0.251747	-7.71002	1.25803e-14	5.53001e-13
ENSG00000213442	RPL18AP3	6869.94	-2.53076	0.328355	-7.70739	1.28413e-14	5.63935e-13
ENSG00000181817		1448.16	-1.3673	0.177413	-7.70686	1.28947e-14	5.65735e-13
ENSG00000215268		36.2958	-4.40115	0.571089	-7.70659	1.29226e-14	5.6642e-13
ENSG00000242747		83.0276	-5.27295	0.684367	-7.70486	1.30988e-14	5.73593e-13
ENSG00000159202	UBE2Z	2562.83	-3.17015	0.411503	-7.70383	1.32045e-14	5.77666e-13
ENSG00000257645		5.64947	-5.50415	0.714531	-7.70316	1.32743e-14	5.80169e-13
ENSG00000225406	ELF2P4	32.8788	-4.93376	0.640638	-7.70132	1.34671e-14	5.88033e-13
ENSG00000270175		72.4844	-2.67217	0.347101	-7.69856	1.37613e-14	6.00309e-13
ENSG00000261167		238.476	-2.1007	0.272887	-7.69804	1.38166e-14	6.02146e-13
ENSG00000172172	MRPL13	1277.42	-1.71563	0.222922	-7.6961	1.4028e-14	6.10196e-13
ENSG00000181038	METTL23	1264.22	-1.76485	0.229316	-7.69614	1.40243e-14	6.10196e-13
ENSG00000284031	MIR4761	2.88271	-3.69681	0.480381	-7.69558	1.4085e-14	6.11987e-13
ENSG00000283483		21.9749	-5.35924	0.696414	-7.69549	1.40958e-14	6.11987e-13
ENSG00000127952	STYXL1	1080.17	-1.50228	0.195227	-7.69506	1.41425e-14	6.13431e-13
ENSG00000265693		3.50673	-3.90538	0.507571	-7.69426	1.42315e-14	6.14436e-13
ENSG00000173915	ATP5MK	3654.57	-1.47065	0.191138	-7.6942	1.42385e-14	6.14436e-13
ENSG00000276790		13.8167	-3.8324	0.498078	-7.69439	1.42175e-14	6.14436e-13
ENSG00000127125	PPCS	3014.76	-1.76196	0.228989	-7.69455	1.41997e-14	6.14436e-13
ENSG00000224543	SNRPGP15	91.9759	-3.77951	0.491209	-7.69431	1.42265e-14	6.14436e-13
ENSG00000226068	HNRNPA3P4	41.8615	-5.09551	0.662259	-7.69413	1.42462e-14	6.14436e-13
ENSG00000229638	RPL4P4	6888.82	-3.27834	0.426107	-7.69371	1.42931e-14	6.15879e-13
ENSG00000226572	SNORD57	2.50122	-4.27964	0.556289	-7.69319	1.43514e-14	6.1757e-13
ENSG00000204237	OXLD1	818.086	-2.04349	0.265626	-7.69312	1.43593e-14	6.1757e-13
ENSG00000238251	NSA2P7	164.473	-3.9312	0.511043	-7.69249	1.44294e-14	6.20004e-13
ENSG00000234289	H2BS1	59.4729	-2.86612	0.372677	-7.69062	1.46422e-14	6.28558e-13
ENSG00000225131	PSME2P2	204.817	-3.2162	0.418229	-7.69003	1.47104e-14	6.30893e-13
ENSG00000223722	IFITM3P2	115.357	-4.76289	0.619497	-7.68831	1.49086e-14	6.38796e-13
ENSG00000102738	MRPS31	1409	-1.98454	0.258246	-7.68469	1.53362e-14	6.56504e-13
ENSG00000232938	RPL23AP87	56.7674	-2.59996	0.338384	-7.68345	1.54857e-14	6.62286e-13
ENSG00000213189	BTF3L4P2	332.951	-1.91384	0.249098	-7.68307	1.55325e-14	6.63667e-13
ENSG00000153774	CFDP1	3249.96	-2.02723	0.263866	-7.68282	1.55628e-14	6.64343e-13
ENSG00000101898	MCTS2P	83.6284	-2.8676	0.37332	-7.68134	1.5743e-14	6.71409e-13
ENSG00000205155	PSENEN	1980.62	-1.62418	0.211467	-7.68052	1.58443e-14	6.75099e-13
ENSG00000223797	ENTPD3-AS1	280.154	-2.15232	0.280261	-7.67969	1.59473e-14	6.78855e-13
ENSG00000226646	RPL7P37	10.6983	-6.57219	0.856026	-7.67756	1.62142e-14	6.89573e-13
ENSG00000232916	HMGN2P27	13.4396	-7.28571	0.948976	-7.67745	1.62291e-14	6.89573e-13
ENSG00000173966		8.3636	-5.29417	0.689811	-7.67481	1.65662e-14	7.02591e-13
ENSG00000224411	HSP9AA2P	1308.27	-3.4329	0.447291	-7.67488	1.65578e-14	7.02591e-13
ENSG00000268129		77.0158	-2.47014	0.3219	-7.67364	1.67179e-14	7.08368e-13
ENSG00000213839	TMX2P1	301.319	-2.87008	0.37403	-7.6734	1.67502e-14	7.09083e-13
ENSG00000228305	PRELID1P6	410.644	-2.27694	0.296742	-7.67313	1.67848e-14	7.09889e-13
ENSG00000224858	RPL29P11	1332.44	-3.51127	0.457624	-7.67282	1.6825e-14	7.10281e-13
ENSG00000272777		60.8744	-2.63019	0.342792	-7.67285	1.68215e-14	7.10281e-13
ENSG00000215210	RBMXP2	160.642	-3.87615	0.505291	-7.67112	1.70499e-14	7.19111e-13
ENSG00000184903	IMMP2L	611.541	-2.20964	0.288101	-7.66966	1.72452e-14	7.26678e-13
ENSG00000137210	TMEM14B	4726.5	-1.86424	0.243106	-7.66841	1.74144e-14	7.33134e-13
ENSG00000264294	SNORD55	3.17125	-4.44334	0.579534	-7.66709	1.75943e-14	7.40027e-13
ENSG00000249311	TERF1P3	7.42957	-5.96292	0.777754	-7.66685	1.76276e-14	7.40748e-13
ENSG00000174721	FGFBP3	276.187	-2.27255	0.296509	-7.66435	1.79742e-14	7.54618e-13
ENSG00000178449	COX14	2801.23	-1.3249	0.172884	-7.66355	1.80868e-14	7.58653e-13
ENSG00000124733	MEA1	3971.87	-1.7343	0.226341	-7.66234	1.82581e-14	7.65135e-13
ENSG00000156603	MED19	608.862	-1.78477	0.232961	-7.66126	1.84115e-14	7.70859e-13
ENSG00000250616		113.499	-2.24731	0.293376	-7.66017	1.85685e-14	7.76721e-13
ENSG00000283840	MIR6764	2.52013	-4.29588	0.561083	-7.6564	1.91211e-14	7.97654e-13
ENSG00000278099	RNVU1-2A	5.98044	-7.58141	0.990191	-7.65651	1.91047e-14	7.97654e-13
ENSG00000226471		118.483	-2.55636	0.333881	-7.65651	1.91051e-14	7.97654e-13
ENSG00000284064	MIR6834	2.52193	-4.28394	0.559572	-7.65576	1.92176e-14	8.00951e-13
ENSG00000124688	MAD2L1BP	1099.68	-1.57154	0.205309	-7.65452	1.94028e-14	8.07934e-13
ENSG00000212385	RNU6-817P	8.33369	-3.37767	0.44128	-7.65427	1.94419e-14	8.08825e-13
ENSG00000242372	EIF6	4283.39	-1.30996	0.171153	-7.6537	1.9528e-14	8.11669e-13
ENSG00000283941	MIR6	2.37452	-4.05379	0.529674	-7.65336	1.95799e-14	8.13089e-13
ENSG00000284265	MIR4683	2.41945	-4.07979	0.533145	-7.65231	1.97405e-14	8.19016e-13
ENSG00000251596	HADHAP1	98.8393	-4.09216	0.534771	-7.65217	1.97616e-14	8.19151e-13
ENSG00000247746	USP51	696.173	-2.38196	0.31135	-7.65044	2.0029e-14	8.29483e-13
ENSG00000169902	TPST1	936.079	-2.14037	0.279783	-7.65012	2.00788e-14	8.30796e-13
ENSG00000204272	NBDY	2039.55	-1.81683	0.237588	-7.64697	2.05776e-14	8.49896e-13
ENSG00000260490	MYL12BP1	388.215	-3.60037	0.470823	-7.64697	2.05763e-14	8.49896e-13
ENSG00000115268	RPS15	7146.76	-1.92104	0.251229	-7.64654	2.06454e-14	8.5193e-13
ENSG00000218512	SPTLC1P2	8.28593	-3.56934	0.466834	-7.64583	2.07596e-14	8.5587e-13
ENSG00000228665		296.159	-5.4356	0.710981	-7.64521	2.08607e-14	8.59266e-13
ENSG00000160570	DEDD2	1147.49	-1.83065	0.239461	-7.64485	2.09185e-14	8.60874e-13
ENSG00000175048	ZDHHC14	283.636	-2.83872	0.371337	-7.64459	2.09617e-14	8.61876e-13
ENSG00000109775	UFSP2	2378.36	-1.92847	0.252272	-7.64439	2.09936e-14	8.62412e-13
ENSG00000267162	SDHDP1	4.96828	-7.37795	0.965328	-7.64294	2.12315e-14	8.71406e-13
ENSG00000274210	RNVU1-27	12.6787	-6.27078	0.820521	-7.64244	2.13145e-14	8.74027e-13
ENSG00000204574	ABCF1	283.813	-1.74254	0.228025	-7.64188	2.14069e-14	8.77033e-13
ENSG00000127920	GNG11	2890.73	-2.10884	0.275975	-7.64141	2.14853e-14	8.79458e-13
ENSG00000236905		23.3154	-5.64095	0.738306	-7.6404	2.16553e-14	8.85624e-13
ENSG00000256704	ENTR1P1	6.21871	-4.66892	0.611191	-7.63905	2.18824e-14	8.94114e-13
ENSG00000226432		144.942	-3.4282	0.44886	-7.63756	2.21372e-14	9.0372e-13
ENSG00000270722	RNVU1-31	5.10589	-6.72039	0.879986	-7.63693	2.22457e-14	9.07338e-13
ENSG00000135940	COX5B	7341.07	-1.53216	0.200642	-7.6363	2.23555e-14	9.11008e-13
ENSG00000058799	YIPF1	2500.63	-2.1311	0.279115	-7.6352	2.2547e-14	9.17992e-13
ENSG00000109846	CRYAB	6038.95	-2.9917	0.391864	-7.63452	2.26657e-14	9.22008e-13
ENSG00000070081	NUCB2	3937.24	-1.92871	0.252647	-7.63401	2.27566e-14	9.24883e-13
ENSG00000226241		13.7901	-5.12103	0.670903	-7.63304	2.29287e-14	9.31051e-13
ENSG00000260689	HNRNPA3P11	14.6106	-5.66798	0.7426	-7.63262	2.30028e-14	9.33233e-13
ENSG00000279062	CDRT15P8	2.682	-4.33823	0.568396	-7.63241	2.30397e-14	9.33902e-13
ENSG00000242571	RPL21P11	452.923	-3.90783	0.512062	-7.63156	2.31937e-14	9.39312e-13
ENSG00000120948		3552.6	-2.77249	0.363325	-7.63088	2.33163e-14	9.43446e-13
ENSG00000158526	TSR2	3622.39	-1.72262	0.225762	-7.63024	2.34322e-14	9.47296e-13
ENSG00000234241		237.794	-4.41111	0.578221	-7.62876	2.37026e-14	9.57386e-13
ENSG00000212789	ST13P5	315.154	-3.60542	0.472653	-7.62804	2.38354e-14	9.619e-13
ENSG00000105700	KXD1	1844.47	-2.05707	0.269748	-7.62587	2.42385e-14	9.77307e-13
ENSG00000108924	HLF	1465.25	-2.95759	0.387853	-7.62555	2.42998e-14	9.78916e-13
ENSG00000214268	RPS3AP33	8.01829	-5.98724	0.785223	-7.62489	2.44244e-14	9.8307e-13
ENSG00000265354	TIMM23	2597.2	-1.4201	0.186259	-7.62431	2.45345e-14	9.86634e-13
ENSG00000238923	RNU7-1	2.44118	-4.06601	0.533349	-7.62355	2.46795e-14	9.91595e-13
ENSG00000117862	TXNDC12	3827.43	-1.75592	0.230335	-7.62333	2.47218e-14	9.91876e-13
ENSG00000251453	HAUS1P1	13.145	-4.13013	0.541778	-7.62329	2.47298e-14	9.91876e-13
ENSG00000109519	GRPEL1	1117.06	-1.56255	0.204995	-7.62239	2.49018e-14	9.97901e-13
ENSG00000284246	MIR6716	2.37667	-4.00089	0.524955	-7.62139	2.50951e-14	1.00477e-12
ENSG00000274998	SNORA17A	2.54345	-4.19459	0.550444	-7.62037	2.52944e-14	1.01186e-12
ENSG00000244009	B3GAT3P1	34.433	-3.96409	0.520498	-7.61595	2.61764e-14	1.04532e-12
ENSG00000145494	NDUFS6	2439.33	-1.27438	0.167329	-7.61603	2.61591e-14	1.04532e-12
ENSG00000123965	PMS2P5	22.0806	-2.96591	0.389491	-7.61483	2.64047e-14	1.05352e-12
ENSG00000283958	MIR1248	2.54519	-4.19626	0.551124	-7.614	2.65746e-14	1.05938e-12
ENSG00000204628	RACK1	30030	-1.80074	0.236508	-7.61384	2.66063e-14	1.05972e-12
ENSG00000225022	UBE2D3P1	335.56	-3.33154	0.437595	-7.6133	2.67184e-14	1.06233e-12
ENSG00000176209	SMIM19	1886.86	-1.95154	0.256329	-7.61341	2.66956e-14	1.06233e-12
ENSG00000284252	MIR4444-1	2.40002	-4.11235	0.540176	-7.61298	2.67853e-14	1.06407e-12
ENSG00000272602	ZNF595	654.971	-2.11705	0.278094	-7.61271	2.68414e-14	1.0651e-12
ENSG00000260708		222.196	-2.50384	0.328907	-7.61263	2.68577e-14	1.0651e-12
ENSG00000162599	NFIA	5009.58	-2.33211	0.306512	-7.60855	2.77195e-14	1.09833e-12
ENSG00000124596	OARD1	1829.32	-2.06973	0.272062	-7.60756	2.7932e-14	1.10579e-12
ENSG00000235670	RPL21P4	11.2396	-6.25431	0.822229	-7.60653	2.81562e-14	1.1137e-12
ENSG00000254343		329.621	-3.00839	0.395546	-7.60568	2.83412e-14	1.12005e-12
ENSG00000213701	SETP22	9.94641	-5.85025	0.769273	-7.60491	2.851e-14	1.12575e-12
ENSG00000074319	TSG11	3204.67	-1.71086	0.225012	-7.60339	2.88479e-14	1.13811e-12
ENSG00000240392	RPL9P3	160.203	-4.79676	0.6309	-7.60304	2.89254e-14	1.14019e-12
ENSG00000201754	SNORD52	2.54793	-4.18206	0.550121	-7.60207	2.91427e-14	1.14678e-12
ENSG00000284020	MIR4697	2.55117	-4.1883	0.550941	-7.60207	2.91423e-14	1.14678e-12
ENSG00000218426		6839.2	-3.37945	0.444591	-7.60126	2.93267e-14	1.15303e-12
ENSG00000241127	YAE1	693.208	-1.83795	0.241854	-7.59944	2.97419e-14	1.16835e-12
ENSG00000229985		3.95502	-5.39214	0.709706	-7.59771	3.01419e-14	1.18305e-12
ENSG00000165060	FXN	602.515	-1.66968	0.219767	-7.59752	3.0187e-14	1.18381e-12
ENSG00000250492	INTS6P1	86.2734	-3.10234	0.408354	-7.59719	3.0263e-14	1.18577e-12
ENSG00000229944	EIF4EP2	631.113	-2.19252	0.288605	-7.59696	3.03173e-14	1.18689e-12
ENSG00000138495	COX17	1774.86	-1.33375	0.175572	-7.5966	3.04011e-14	1.18915e-12
ENSG00000213178	RPL22P1	5026.3	-3.26186	0.429636	-7.59215	3.14651e-14	1.22971e-12
ENSG00000116030	SUMO1	3791.79	-2.14681	0.282788	-7.59159	3.16015e-14	1.23399e-12
ENSG00000214892	USP8P1	15.115	-3.51968	0.46364	-7.5914	3.16456e-14	1.23467e-12
ENSG00000284570	MIR775	2.55781	-4.15347	0.547296	-7.58908	3.22193e-14	1.24433e-12
ENSG00000284448	MIR651	2.55781	-4.15347	0.547296	-7.58908	3.22193e-14	1.24433e-12
ENSG00000284121	MIR198	2.55781	-4.15347	0.547296	-7.58908	3.22193e-14	1.24433e-12
ENSG00000284125	MIR1825	2.55781	-4.15347	0.547296	-7.58908	3.22193e-14	1.24433e-12
ENSG00000208797	SNORD73A	2.55781	-4.15347	0.547296	-7.58908	3.22193e-14	1.24433e-12
ENSG00000283803	MIR3198-2	2.55781	-4.15347	0.547296	-7.58908	3.22193e-14	1.24433e-12
ENSG00000274072		2.55781	-4.15347	0.547296	-7.58908	3.22193e-14	1.24433e-12
ENSG00000284135	MIR3654	2.55781	-4.15347	0.547296	-7.58908	3.22193e-14	1.24433e-12
ENSG00000284564	MIR364	2.55781	-4.15347	0.547296	-7.58908	3.22193e-14	1.24433e-12
ENSG00000283944	MIR479	2.55781	-4.15347	0.547296	-7.58908	3.22193e-14	1.24433e-12
ENSG00000284216	MIR199	2.55781	-4.15347	0.547296	-7.58908	3.22193e-14	1.24433e-12
ENSG00000284268	MIR1181	2.55781	-4.15347	0.547296	-7.58908	3.22193e-14	1.24433e-12
ENSG00000196507	TCEAL3	1858.24	-1.84281	0.242843	-7.58847	3.23695e-14	1.24908e-12
ENSG00000139343	SNRPF	1462.1	-1.82717	0.240794	-7.58811	3.24617e-14	1.25158e-12
ENSG00000110871	COQ5	1991.55	-1.49583	0.197142	-7.58759	3.25898e-14	1.25546e-12
ENSG00000277370	SNORD49A	2.55736	-4.15729	0.547966	-7.58678	3.27954e-14	1.26232e-12
ENSG00000283721	MIR6884	2.30146	-4.43717	0.584918	-7.58597	3.30006e-14	1.26725e-12
ENSG00000235453	SMIM27	337.974	-2.14953	0.283353	-7.58606	3.29777e-14	1.26725e-12
ENSG00000144647	POMGNT2	1332.49	-1.59253	0.209931	-7.58595	3.30064e-14	1.26725e-12
ENSG00000252558	RNU6-914P	3.21076	-3.93045	0.518185	-7.58502	3.32428e-14	1.27525e-12
ENSG00000163001	CFAP36	3879.81	-1.66706	0.219798	-7.58449	3.33798e-14	1.27944e-12
ENSG00000178458	H3P16	1051.62	-2.72352	0.359169	-7.58285	3.38037e-14	1.2946e-12
ENSG00000272758	WDR5B-DT	156.198	-2.42346	0.319605	-7.58268	3.38481e-14	1.29522e-12
ENSG00000241506	PSMC1P1	1129.58	-2.7973	0.368924	-7.58231	3.39466e-14	1.2979e-12
ENSG00000284427	MIR4647	2.55973	-4.14577	0.546795	-7.58194	3.40432e-14	1.29793e-12
ENSG00000274544	SNORD28	2.53806	-4.28268	0.564852	-7.58195	3.40391e-14	1.29793e-12
ENSG00000170634	ACYP2	647.623	-1.64998	0.217614	-7.58214	3.39912e-14	1.29793e-12
ENSG00000228559		79.3043	-2.74625	0.362213	-7.58187	3.40605e-14	1.29793e-12
ENSG00000236439		2171.74	-3.76884	0.497135	-7.58111	3.42599e-14	1.30444e-12
ENSG00000258465		18.2881	-4.9613	0.654599	-7.57915	3.47825e-14	1.32324e-12
ENSG00000224760	C1DP3	2.62971	-6.64459	0.876718	-7.57894	3.48376e-14	1.32423e-12
ENSG00000109016	DHRS7B	1812.12	-1.37474	0.181409	-7.57816	3.50501e-14	1.33121e-12
ENSG00000230330	HMGN2P3	483.331	-2.26243	0.298578	-7.57734	3.52724e-14	1.33854e-12
ENSG00000284010	MIR675	2.4901	-4.17608	0.551149	-7.57705	3.53503e-14	1.33933e-12
ENSG00000239797	RPL21P39	457.883	-1.95379	0.257857	-7.57704	3.53517e-14	1.33933e-12
ENSG00000258759		35.6532	-3.70264	0.488851	-7.57417	3.61421e-14	1.36798e-12
ENSG00000134825	TMEM258	3622.24	-1.68458	0.222414	-7.57408	3.61677e-14	1.36798e-12
ENSG00000283704		2.56339	-4.14959	0.547892	-7.57374	3.62629e-14	1.37045e-12
ENSG00000117118	SDHB	3223.72	-1.38719	0.183185	-7.57261	3.65803e-14	1.3813e-12
ENSG00000124570	SERPINB6	5416.78	-1.72066	0.227237	-7.57208	3.67299e-14	1.38581e-12
ENSG00000253893	FAM85B	6.30471	-3.58255	0.473231	-7.5704	3.72091e-14	1.40274e-12
ENSG00000213296		28.4595	-6.05681	0.800133	-7.56976	3.73927e-14	1.40734e-12
ENSG00000229887	HNRNPA1P6	38.0764	-5.39168	0.712257	-7.56986	3.73637e-14	1.40734e-12
ENSG00000212330	RNU6-244P	2.56069	-4.17327	0.551402	-7.56847	3.77646e-14	1.42017e-12
ENSG00000226015	CCT8P1	410.373	-3.3031	0.436501	-7.56721	3.81328e-14	1.43167e-12
ENSG00000236493	EIF2S2P3	90.8746	-3.35905	0.44389	-7.5673	3.81068e-14	1.43167e-12
ENSG00000207496	SNORA7A	2.56344	-4.13244	0.546151	-7.56648	3.83478e-14	1.43856e-12
ENSG00000167920	TMEM99	825.312	-1.77397	0.234456	-7.56634	3.83889e-14	1.43892e-12
ENSG00000276664		2.92265	-4.26154	0.563341	-7.56476	3.88583e-14	1.45533e-12
ENSG00000225200		958.964	-3.98578	0.526966	-7.56364	3.91952e-14	1.46675e-12
ENSG00000214832	UPF3AP2	214.934	-3.14594	0.415995	-7.56244	3.95581e-14	1.47912e-12
ENSG00000168090	COPS6	3230.66	-1.41186	0.186702	-7.56212	3.9655e-14	1.48153e-12
ENSG00000284542	MIR3614	2.56687	-4.13405	0.546944	-7.55844	4.07931e-14	1.52281e-12
ENSG00000224631	RPS27AP16	7626.82	-3.31288	0.438338	-7.55781	4.09918e-14	1.52898e-12
ENSG00000237263	MAPK6P3	14.2212	-5.04857	0.668153	-7.556	4.15651e-14	1.5491e-12
ENSG00000234130	AP2B1P1	121.315	-3.39913	0.450005	-7.55355	4.23565e-14	1.57731e-12
ENSG00000229119		4023.43	-2.4902	0.329735	-7.55213	4.28212e-14	1.59332e-12
ENSG00000004779	NDUFAB1	2938.39	-1.20159	0.159114	-7.55176	4.29429e-14	1.59656e-12
ENSG00000168904	LRRC28	577.217	-1.91123	0.253132	-7.55031	4.34225e-14	1.61308e-12
ENSG00000101843	PSMD1	2064.61	-1.61441	0.213825	-7.55015	4.34761e-14	1.61376e-12
ENSG00000284464	MIR136	2.56613	-4.17312	0.552736	-7.54995	4.35437e-14	1.61496e-12
ENSG00000122783	CYREN	976.037	-1.58844	0.210416	-7.54903	4.38502e-14	1.62501e-12
ENSG00000229870	RPL21P89	10.4693	-3.93562	0.521359	-7.54878	4.39361e-14	1.62688e-12
ENSG00000249230	CDH12P2	12.2258	-3.95084	0.523411	-7.54826	4.41125e-14	1.63209e-12
ENSG00000231579	RPL7P21	71.7284	-3.03979	0.402832	-7.54605	4.48667e-14	1.65629e-12
ENSG00000236992	RPL12P12	527.662	-3.67619	0.48717	-7.54602	4.48751e-14	1.65629e-12
ENSG00000284214	MIR29C	2.58155	-4.14921	0.549843	-7.54618	4.48207e-14	1.65629e-12
ENSG00000142168	SOD1	9720.67	-1.66549	0.220718	-7.5458	4.49535e-14	1.65785e-12
ENSG00000243155		59.3031	-3.53014	0.467972	-7.5435	4.57537e-14	1.686e-12
ENSG00000225934		4.62371	-3.79687	0.503449	-7.54172	4.63822e-14	1.70779e-12
ENSG00000100711	ZFYVE21	4000.19	-2.14949	0.285036	-7.54113	4.65928e-14	1.70868e-12
ENSG00000228158	TLE1P1	30.0108	-3.39209	0.449808	-7.54121	4.65622e-14	1.70868e-12
ENSG00000156973	PDE6D	842.69	-1.57206	0.20846	-7.54129	4.65332e-14	1.70868e-12
ENSG00000205981	DNAJC19	1417.82	-1.71248	0.227081	-7.54129	4.65335e-14	1.70868e-12
ENSG00000212195	U3	6.71678	-6.95926	0.922798	-7.54148	4.64657e-14	1.70868e-12
ENSG00000160075		7553.31	-1.60709	0.213175	-7.53886	4.74103e-14	1.73727e-12
ENSG00000204592	HLA-E	3151.78	9.64273	1.2792	7.53811	4.76823e-14	1.74584e-12
ENSG00000233040		21.2278	-4.36511	0.579142	-7.53719	4.80203e-14	1.75681e-12
ENSG00000149798	CDC42EP2	984.033	-2.49956	0.331649	-7.53677	4.81767e-14	1.76112e-12
ENSG00000172339	ALG14	919.523	-1.55832	0.206799	-7.53542	4.86775e-14	1.77801e-12
ENSG00000284179	MIR7-1	2.56864	-4.14297	0.549816	-7.5352	4.87592e-14	1.77957e-12
ENSG00000227725	GCOM2	134.024	-2.58798	0.34347	-7.53481	4.89061e-14	1.78351e-12
ENSG00000284458	MIR134	2.57209	-4.1464	0.550335	-7.53433	4.90856e-14	1.78864e-12
ENSG00000217241	CBX3P9	338.655	-2.92012	0.387647	-7.53293	4.96153e-14	1.8065e-12
ENSG00000283842	MIR4751	2.63522	-4.19347	0.556719	-7.53247	4.97888e-14	1.81138e-12
ENSG00000178053	MLF1	665.113	-2.27656	0.30225	-7.53206	4.99456e-14	1.81564e-12
ENSG00000091542	ALKBH5	5516.3	-1.61611	0.214613	-7.53036	5.06013e-14	1.83802e-12
ENSG00000234589		438.779	-4.65453	0.618146	-7.52982	5.08101e-14	1.83977e-12
ENSG00000254683	SNRPCP6	3.08363	-5.36032	0.711864	-7.52998	5.07468e-14	1.83977e-12
ENSG00000110958	PTGES3	7532.39	-2.1334	0.283326	-7.52985	5.07985e-14	1.83977e-12
ENSG00000119650	IFT43	1209.76	-1.75634	0.233247	-7.52996	5.07543e-14	1.83977e-12
ENSG00000260804	LINC1963	637.176	-2.23673	0.297062	-7.5295	5.09345e-14	1.84136e-12
ENSG00000229534	HNRNPA1P53	16.7307	-5.9041	0.784128	-7.5295	5.09345e-14	1.84136e-12
ENSG00000184100	BRD7P2	368.731	-3.36083	0.44638	-7.52908	5.11006e-14	1.84425e-12
ENSG00000181274	FRAT2	678.355	-1.7589	0.233611	-7.52916	5.10665e-14	1.84425e-12
ENSG00000259419	HNRNPCP3	110.878	-4.55295	0.604723	-7.52899	5.11351e-14	1.84425e-12
ENSG00000175854	SWI5	1561.48	-1.86908	0.248341	-7.52626	5.22146e-14	1.8817e-12
ENSG00000120438	TCP1	6402.85	-1.68261	0.223568	-7.52615	5.22598e-14	1.88185e-12
ENSG00000254572	GLULP3	10.9735	-7.79125	1.03528	-7.52573	5.24279e-14	1.88618e-12
ENSG00000169689	CENPX	601.268	-1.78537	0.237239	-7.52564	5.24624e-14	1.88618e-12
ENSG00000277986	U4	3.0292	-4.45425	0.5919	-7.52535	5.25798e-14	1.88891e-12
ENSG00000259246	HMGN2P47	3.612	-7.16345	0.951959	-7.52496	5.27383e-14	1.89312e-12
ENSG00000284134	MIR568	2.51465	-4.05972	0.539513	-7.5248	5.2803e-14	1.89396e-12
ENSG00000232150	ST13P4	292.282	-3.22855	0.429099	-7.52401	5.31211e-14	1.90388e-12
ENSG00000268942	CKS1BP3	52.555	-2.29136	0.304568	-7.52332	5.34033e-14	1.9125e-12
ENSG00000218027		22.9745	-4.20762	0.559307	-7.52292	5.35646e-14	1.91678e-12
ENSG00000103502	CDIPT	3738.76	-1.57483	0.209387	-7.52115	5.42983e-14	1.94151e-12
ENSG00000213842	SUGT1P2	41.2326	-4.29281	0.570984	-7.51826	5.55101e-14	1.9833e-12
ENSG00000254944	ATP5PBP5	57.9194	-2.86421	0.381056	-7.51652	5.6253e-14	2.00827e-12
ENSG00000187601	MAGEH1	1874.7	-1.83115	0.24368	-7.51453	5.71137e-14	2.03741e-12
ENSG00000102934	PLLP	2506.08	-2.06069	0.274247	-7.51398	5.73565e-14	2.04448e-12
ENSG00000092203	TOX4	3184.76	-2.11496	0.281493	-7.51334	5.76388e-14	2.05295e-12
ENSG00000279861		369.059	-4.3397	0.577621	-7.51306	5.77628e-14	2.05417e-12
ENSG00000230243	FKBP1AP3	3.3318	-7.09561	0.944425	-7.51315	5.77195e-14	2.05417e-12
ENSG00000278189	RNA5-8SN1	412.938	-4.05723	0.540035	-7.5129	5.78306e-14	2.05498e-12
ENSG00000274582		2.57119	-4.15598	0.553282	-7.51149	5.84563e-14	2.07561e-12
ENSG00000131043	AAR2	2231.14	-1.46608	0.195204	-7.51047	5.89133e-14	2.09021e-12
ENSG00000284535	MIR6748	2.67357	-4.21382	0.561159	-7.50914	5.95158e-14	2.10832e-12
ENSG00000284482	MIR468	2.67357	-4.21382	0.561159	-7.50914	5.95158e-14	2.10832e-12
ENSG00000202512	RN7SKP23	2.39679	-5.40774	0.720211	-7.50854	5.97894e-14	2.11638e-12
ENSG00000165283	STOML2	3154.59	-1.40828	0.187653	-7.5047	6.1569e-14	2.17769e-12
ENSG00000284415	MIR1287	3.62485	-3.90973	0.520985	-7.5045	6.16633e-14	2.17934e-12
ENSG00000086504	MRPL28	2026.38	-1.29025	0.171937	-7.50419	6.18095e-14	2.18283e-12
ENSG00000213772	EIF1P7	110.892	-5.02352	0.669469	-7.50374	6.20236e-14	2.1887e-12
ENSG00000228501	RPL15P18	210.153	-4.91743	0.655439	-7.5025	6.26119e-14	2.20632e-12
ENSG00000175536	LIPT2	127.941	-2.15416	0.287126	-7.50248	6.26193e-14	2.20632e-12
ENSG00000242272	AK2P2	21.374	-5.27788	0.703562	-7.50165	6.30205e-14	2.21863e-12
ENSG00000219682		84.6968	-2.92034	0.389298	-7.50155	6.30655e-14	2.21863e-12
ENSG00000135441	BLOC1S1	2989.06	-1.5386	0.205139	-7.50026	6.36918e-14	2.23894e-12
ENSG00000229809	ZNF688	644.755	-1.67723	0.223716	-7.49715	6.52223e-14	2.29098e-12
ENSG00000214530	STARD1	1845.73	-1.81558	0.242204	-7.49608	6.5756e-14	2.30796e-12
ENSG00000240854	PSMC2P1	131.6	-3.43512	0.458291	-7.4955	6.60474e-14	2.31641e-12
ENSG00000176101	SSNA1	940.439	-1.89477	0.252819	-7.49456	6.65224e-14	2.33129e-12
ENSG00000233266	HMGB1P31	24.5757	-3.30991	0.441721	-7.49322	6.72055e-14	2.35343e-12
ENSG00000285269		525.585	-3.36014	0.448448	-7.49281	6.74131e-14	2.35889e-12
ENSG00000244968	LIFR-AS1	294.846	-2.69878	0.360208	-7.49229	6.76846e-14	2.36658e-12
ENSG00000217379		17.6632	-7.7175	1.03011	-7.49189	6.78909e-14	2.37199e-12
ENSG00000248569		154.683	-1.90028	0.253718	-7.48973	6.90151e-14	2.40943e-12
ENSG00000267336	EIF4A2P1	72.1169	-5.19544	0.693699	-7.48947	6.91515e-14	2.41235e-12
ENSG00000263606	CHORDC1P4	59.1296	-3.17824	0.424382	-7.48909	6.93504e-14	2.41561e-12
ENSG00000264885		181.622	-2.81385	0.375727	-7.48909	6.93505e-14	2.41561e-12
ENSG00000214322	CBX1P2	27.1313	-5.23588	0.699525	-7.48491	7.15958e-14	2.49193e-12
ENSG00000100564	PIGH	1373.23	-1.79494	0.239818	-7.48459	7.17711e-14	2.49613e-12
ENSG00000125520	SLC2A4RG	1865.81	-1.69136	0.226028	-7.48298	7.26585e-14	2.52316e-12
ENSG00000237506	RPSAP15	1348.49	-2.68126	0.358309	-7.48307	7.26042e-14	2.52316e-12
ENSG00000086232	EIF2AK1	7244.16	-1.54929	0.207064	-7.48221	7.30812e-14	2.53592e-12
ENSG00000189014	SHLD2P3	121	-3.20387	0.428214	-7.48195	7.32285e-14	2.53911e-12
ENSG00000267544	HIKESHIP2	101.929	-3.00934	0.402267	-7.48095	7.37861e-14	2.55651e-12
ENSG00000090487	SPG21	5445.99	-1.76258	0.235623	-7.4805	7.40399e-14	2.56142e-12
ENSG00000124767	GLO1	5459.99	-1.69939	0.227174	-7.4806	7.39868e-14	2.56142e-12
ENSG00000161547	SRSF2	3488.59	-2.6036	0.348231	-7.47664	7.62441e-14	2.63569e-12
ENSG00000243824	RPL12P6	610.233	-3.26911	0.437274	-7.47612	7.65477e-14	2.64419e-12
ENSG00000119559	C19orf25	943.199	-1.48362	0.19846	-7.47566	7.6816e-14	2.65145e-12
ENSG00000172201	ID4	21173.3	-2.50089	0.334599	-7.47427	7.76336e-14	2.67766e-12
ENSG00000147400	CETN2	4621.62	-1.9138	0.256124	-7.47219	7.88695e-14	2.71824e-12
ENSG00000136448	NMT1	2929.1	-1.94645	0.260509	-7.47172	7.91544e-14	2.72601e-12
ENSG00000237054	PRMT5-AS1	199.435	-4.31593	0.577646	-7.47158	7.9235e-14	2.72673e-12
ENSG00000241612		309.919	-4.15411	0.556058	-7.47065	7.98014e-14	2.74416e-12
ENSG00000123595	RAB9A	1228.52	-1.7635	0.236164	-7.46729	8.18651e-14	2.81302e-12
ENSG00000241429	EEF1A1P25	1992.25	-5.32654	0.713431	-7.46609	8.26143e-14	2.83663e-12
ENSG00000226790	HNRNPA3P1	83.7158	-5.11734	0.685507	-7.46504	8.3276e-14	2.85721e-12
ENSG00000206799	SNORA32	2.59884	-4.09033	0.54796	-7.46465	8.35195e-14	2.86128e-12
ENSG00000215034	DSTNP4	15.5045	-5.88518	0.788404	-7.46468	8.34995e-14	2.86128e-12
ENSG00000228247	UBBP2	7.75408	-5.69857	0.763469	-7.46405	8.39009e-14	2.87219e-12
ENSG00000201403	SNORD14B	2.49352	-4.13705	0.554471	-7.46126	8.56998e-14	2.93159e-12
ENSG00000228477		193.006	-3.95901	0.530705	-7.4599	8.65886e-14	2.95978e-12
ENSG00000130956	HABP4	1761.5	-1.73207	0.232198	-7.45942	8.69037e-14	2.96833e-12
ENSG00000176007	FAM22BP	3.48528	-6.71126	0.899725	-7.45923	8.70296e-14	2.97042e-12
ENSG00000188026	RILPL1	1854.6	-2.10413	0.282133	-7.45794	8.78832e-14	2.99732e-12
ENSG00000221420	SNORA81	2.57579	-4.15312	0.556893	-7.45766	8.8075e-14	3.00163e-12
ENSG00000176894	PXMP2	462.735	-1.54737	0.207496	-7.45735	8.82807e-14	3.0064e-12
ENSG00000235698	PA2G4P2	87.0619	-3.85582	0.517093	-7.45671	8.87069e-14	3.01867e-12
ENSG00000214244	SETP21	28.5559	-5.44967	0.730866	-7.45646	8.88788e-14	3.02227e-12
ENSG00000114395	CYB561D2	672.176	-2.28606	0.306628	-7.45548	8.95428e-14	3.04259e-12
ENSG00000134809	TIMM1	1026.37	-1.49118	0.200024	-7.45497	8.98904e-14	3.05214e-12
ENSG00000232727	YWHAEP1	136.7	-3.40277	0.456536	-7.45346	9.09256e-14	3.08501e-12
ENSG00000082515	MRPL22	1200.81	-1.51694	0.20354	-7.45278	9.13922e-14	3.09854e-12
ENSG00000214110	LDHAP4	432.201	-2.68072	0.359712	-7.4524	9.16571e-14	3.10522e-12
ENSG00000105438	KDELR1	9690.06	-1.50814	0.202406	-7.45105	9.25999e-14	3.13485e-12
ENSG00000257884		29.0097	-4.59324	0.616506	-7.45044	9.30283e-14	3.14702e-12
ENSG00000227077		405.697	-3.42681	0.460044	-7.44887	9.41427e-14	3.18237e-12
ENSG00000225869		14.2454	-5.46443	0.733604	-7.44874	9.42334e-14	3.18309e-12
ENSG00000279594		54.3282	-3.12605	0.419689	-7.4485	9.44046e-14	3.18652e-12
ENSG00000283856	MIR773	2.6124	-4.11526	0.552512	-7.44827	9.45702e-14	3.18976e-12
ENSG00000042753	AP2S1	2006.32	-1.23274	0.165522	-7.44758	9.50666e-14	3.20414e-12
ENSG00000187713	TMEM23	2165.66	-1.67416	0.224806	-7.44713	9.53897e-14	3.21267e-12
ENSG00000265236	SNORD84	1.96052	-4.71008	0.632509	-7.44666	9.5732e-14	3.22183e-12
ENSG00000160888	IER2	11877.8	-3.15064	0.423128	-7.44607	9.61624e-14	3.23394e-12
ENSG00000248641	HMGA1P2	43.9114	-2.93202	0.393828	-7.44492	9.70012e-14	3.25939e-12
ENSG00000236779		43.9975	-4.57542	0.614576	-7.44484	9.70616e-14	3.25939e-12
ENSG00000274181	RBPJP2	8.88037	-5.1117	0.686732	-7.44351	9.80441e-14	3.28997e-12
ENSG00000225791	TRAM2-AS1	438.253	-2.39607	0.321983	-7.44162	9.9456e-14	3.33491e-12
ENSG00000032389	EIPR1	1519.28	-1.7231	0.231559	-7.44133	9.96782e-14	3.33991e-12
ENSG00000168556	ING2	707.774	-1.70327	0.228907	-7.44086	1.00034e-13	3.34938e-12
ENSG00000278615	C11orf98	639.201	-2.2872	0.307406	-7.44033	1.00435e-13	3.36037e-12
ENSG00000075336	TIMM21	917.044	-1.72396	0.231758	-7.43864	1.01725e-13	3.39855e-12
ENSG00000123353	ORMDL2	1796.28	-1.69408	0.227738	-7.43872	1.01668e-13	3.39855e-12
ENSG00000141026	MED9	1381.14	-1.56526	0.210426	-7.43853	1.01816e-13	3.3991e-12
ENSG00000132763	MMACHC	641.674	-1.99955	0.268883	-7.43652	1.03369e-13	3.44844e-12
ENSG00000240233	RN7SL587P	7.94283	-7.35931	0.989767	-7.4354	1.04253e-13	3.47287e-12
ENSG00000242899	RPL7P16	48.4999	-6.22927	0.837775	-7.43549	1.04178e-13	3.47287e-12
ENSG00000164081	TEX264	3196.55	-1.1876	0.159737	-7.43471	1.04797e-13	3.48845e-12
ENSG00000213621	RPSAP54	713.482	-3.24959	0.437167	-7.43329	1.05928e-13	3.52333e-12
ENSG00000184785	SMIM1	337.523	-2.75671	0.370869	-7.43311	1.06075e-13	3.52333e-12
ENSG00000185875	THNSL1	1050.22	-1.93709	0.260601	-7.43317	1.06025e-13	3.52333e-12
ENSG00000166136	NDUFB8	5047.05	-1.27624	0.1717	-7.43293	1.06221e-13	3.52561e-12
ENSG00000254335	CDH12P1	11.3829	-4.04086	0.54371	-7.43201	1.06958e-13	3.54749e-12
ENSG00000182791	CCDC87	69.717	-2.65362	0.357057	-7.4319	1.07046e-13	3.54785e-12
ENSG00000261819		139.848	-2.3202	0.312217	-7.43139	1.0746e-13	3.55899e-12
ENSG00000125650	PSPN	255.399	-1.83952	0.247575	-7.43015	1.08474e-13	3.58998e-12
ENSG00000266501	ATG12P1	45.5827	-3.57683	0.481469	-7.429	1.09419e-13	3.61647e-12
ENSG00000103160	HSDL1	2527.22	-2.08726	0.280962	-7.42899	1.09432e-13	3.61647e-12
ENSG00000233278	RPS26P2	9.28646	-5.92468	0.797577	-7.42835	1.09959e-13	3.63125e-12
ENSG00000254779	EGLN1P1	24.0624	-3.81947	0.514226	-7.42761	1.10579e-13	3.64911e-12
ENSG00000200530	SNORD35B	2.6	-4.13336	0.556505	-7.42735	1.10792e-13	3.65351e-12
ENSG00000230067	HSPD1P6	113.101	-4.00697	0.539549	-7.42652	1.11496e-13	3.67407e-12
ENSG00000167797	CDK2AP2	1837.75	-2.14207	0.28844	-7.4264	1.11597e-13	3.67475e-12
ENSG00000213412	HNRNPA1P33	70.1729	-4.97968	0.67065	-7.42516	1.12647e-13	3.70667e-12
ENSG00000168303	MPLKIP	1542.06	-1.40791	0.189773	-7.41892	1.18082e-13	3.88271e-12
ENSG00000100243	CYB5R3	4319.17	-2.01737	0.271941	-7.41841	1.18533e-13	3.89197e-12
ENSG00000074706	IPCEF1	2070.43	-4.09791	0.552391	-7.4185	1.18454e-13	3.89197e-12
ENSG00000215712	TMEM242	1249.8	-1.72396	0.232397	-7.41818	1.18744e-13	3.8961e-12
ENSG00000218283	MORF4L1P1	3770.53	-2.17093	0.292683	-7.41735	1.19483e-13	3.91753e-12
ENSG00000185437	SH3BGR	500.373	-2.1808	0.294023	-7.41709	1.19723e-13	3.92259e-12
ENSG00000249264	EEF1A1P9	5925.79	-4.67699	0.630595	-7.41679	1.19993e-13	3.92864e-12
ENSG00000174886	NDUFA11	4108.81	-1.24711	0.16815	-7.41663	1.20141e-13	3.93066e-12
ENSG00000235325	SRSF3P5	26.3294	-6.45785	0.870749	-7.41643	1.20318e-13	3.93365e-12
ENSG00000178537	SLC25A2	756.171	-1.83279	0.247151	-7.41563	1.21043e-13	3.95455e-12
ENSG00000213542		213.98	-4.46449	0.602132	-7.41447	1.22114e-13	3.98667e-12
ENSG00000133800	LYVE1	609.915	-4.11968	0.555677	-7.4138	1.2273e-13	4.00108e-12
ENSG00000150433	TMEM218	707.242	-1.97869	0.26689	-7.41387	1.22664e-13	4.00108e-12
ENSG00000117791	MTARC2	1948.42	-2.14934	0.289974	-7.4122	1.24218e-13	4.04671e-12
ENSG00000101084	RAB5IF	2814.53	-1.38681	0.187104	-7.41201	1.24402e-13	4.04983e-12
ENSG00000127540	UQCR11	5116.9	-1.3309	0.179608	-7.41006	1.26241e-13	4.10677e-12
ENSG00000256690		47.7331	-4.01996	0.542579	-7.40898	1.27272e-13	4.13737e-12
ENSG00000136770	DNAJC1	2857.72	-1.42782	0.19273	-7.40843	1.27806e-13	4.15179e-12
ENSG00000171735	CAMTA1	1578.8	-1.94995	0.263254	-7.40709	1.29102e-13	4.19093e-12
ENSG00000202363	SNORA62	2.59343	-4.12821	0.557504	-7.40481	1.31336e-13	4.26042e-12
ENSG00000125845	BMP2	1448.5	-2.68582	0.362763	-7.4038	1.32342e-13	4.28697e-12
ENSG00000214077	GNAQP1	35.3209	-4.2531	0.574448	-7.40382	1.32327e-13	4.28697e-12
ENSG00000212961	HNRNPA1P4	32.0491	-4.3508	0.587672	-7.40345	1.32694e-13	4.29536e-12
ENSG00000272182		69.6596	-2.87685	0.388599	-7.40312	1.33025e-13	4.30302e-12
ENSG00000197258	EIF4BP6	1650.35	-2.37757	0.321182	-7.40254	1.33606e-13	4.31877e-12
ENSG00000214561	RBBP4P4	39.1879	-4.24536	0.57351	-7.40242	1.3373e-13	4.31972e-12
ENSG00000274819		7.90146	-3.98349	0.538146	-7.40225	1.33897e-13	4.32208e-12
ENSG00000131467	PSME3	1843.5	-2.65726	0.359065	-7.40049	1.35684e-13	4.37668e-12
ENSG00000169223	LMAN2	7550.61	-1.46151	0.19753	-7.39893	1.37291e-13	4.42539e-12
ENSG00000166681	BEX3	7039.25	-2.00795	0.271431	-7.39762	1.38644e-13	4.46586e-12
ENSG00000225858	MATR3P1	4.52217	-5.98176	0.808729	-7.39649	1.39828e-13	4.50084e-12
ENSG00000224273		7.34544	-4.79294	0.64813	-7.39503	1.41374e-13	4.54208e-12
ENSG00000273387		36.9461	-2.76353	0.373706	-7.39493	1.41488e-13	4.54208e-12
ENSG00000259431	THTPA	1056.43	-2.22963	0.301509	-7.39491	1.41506e-13	4.54208e-12
ENSG00000166133	RPUSD2	496.026	-1.48446	0.20074	-7.39495	1.41459e-13	4.54208e-12
ENSG00000108433	GOSR2	1802.2	-2.4243	0.327845	-7.39466	1.41775e-13	4.54754e-12
ENSG00000117362	APH1A	6529.83	-1.75562	0.237456	-7.39344	1.43081e-13	4.58621e-12
ENSG00000260572		135.353	-2.35484	0.318586	-7.39154	1.4514e-13	4.64894e-12
ENSG00000280153		58.144	-3.72801	0.504521	-7.38921	1.47705e-13	4.72781e-12
ENSG00000159200	RCAN1	2596.24	-2.5371	0.343374	-7.38872	1.48244e-13	4.74175e-12
ENSG00000229932	YWHAZP3	317.329	-3.47613	0.4705	-7.38817	1.48863e-13	4.75822e-12
ENSG00000237190	CDKN2AIPNL	1183.8	-1.41333	0.191299	-7.38807	1.48973e-13	4.75841e-12
ENSG00000180662	RPL21P8	12.1613	-6.67575	0.903642	-7.3876	1.49498e-13	4.77186e-12
ENSG00000258359	PCNPP1	22.7941	-3.56747	0.482907	-7.38749	1.49628e-13	4.77266e-12
ENSG00000102241	HTATSF1	5121.12	-1.94112	0.262784	-7.38674	1.5047e-13	4.79618e-12
ENSG00000002330	BAD	2579.85	-1.29402	0.175187	-7.3865	1.5074e-13	4.79955e-12
ENSG00000115041	KCNIP3	768.088	-2.4982	0.338213	-7.38646	1.50785e-13	4.79955e-12
ENSG00000254805	SNRPCP14	3.39538	-4.85938	0.65793	-7.38585	1.51479e-13	4.81829e-12
ENSG00000118976	OTUD4P1	64.1444	-3.96144	0.536603	-7.38244	1.55412e-13	4.93998e-12
ENSG00000258712	CXADRP2	6.3378	-4.27358	0.57897	-7.38135	1.56697e-13	4.97735e-12
ENSG00000136908	DPM2	2146.04	-1.67819	0.227386	-7.38034	1.57883e-13	5.01155e-12
ENSG00000204253	HNRNPCP2	1616.8	-2.85731	0.387202	-7.37938	1.59033e-13	5.04456e-12
ENSG00000283580		20.7962	-3.27407	0.443732	-7.37848	1.60101e-13	5.07296e-12
ENSG00000240135	PSMD12P1	36.2679	-3.83997	0.520431	-7.37844	1.6015e-13	5.07296e-12
ENSG00000207395	Y_RNA	1.94814	-4.14688	0.562053	-7.37808	1.60586e-13	5.08327e-12
ENSG00000232859	LYRM9	1440.74	-2.04505	0.27727	-7.37567	1.63519e-13	5.17252e-12
ENSG00000133983	COX16	2217.75	-1.68868	0.228964	-7.37532	1.63948e-13	5.17896e-12
ENSG00000269711		125.674	22.7007	3.0779	7.37538	1.63873e-13	5.17896e-12
ENSG00000233476	EEF1A1P6	71606.1	-2.2137	0.300154	-7.37521	1.64085e-13	5.1797e-12
ENSG00000244363	RPL7P23	3029.33	-3.83222	0.519751	-7.3732	1.66586e-13	5.25502e-12
ENSG00000185275	CD24P4	1141.18	-2.74458	0.372371	-7.37056	1.69917e-13	5.35642e-12
ENSG00000187049	TMEM216	694.349	-2.12499	0.288315	-7.37035	1.70182e-13	5.36109e-12
ENSG00000107949	BCCIP	3121.01	-1.5481	0.210052	-7.37007	1.70534e-13	5.36848e-12
ENSG00000053371		2175.94	-1.4868	0.201752	-7.36944	1.71351e-13	5.3905e-12
ENSG00000114779	ABHD14B	2947.75	-1.94913	0.264497	-7.3692	1.71654e-13	5.39633e-12
ENSG00000168734	PKIG	3668.38	-1.35504	0.183886	-7.3689	1.7204e-13	5.40474e-12
ENSG00000196531	NACA	26228.3	-1.54152	0.209288	-7.36555	1.76413e-13	5.53833e-12
ENSG00000239880	RALBP1P1	24.827	-4.78753	0.649998	-7.36545	1.76555e-13	5.53901e-12
ENSG00000115128	SF3B6	3792.48	-1.81829	0.246875	-7.36523	1.76836e-13	5.54401e-12
ENSG00000181929	PRKAG1	2920.21	-1.53476	0.208398	-7.36458	1.7771e-13	5.56758e-12
ENSG00000186298	PPP1CC	5526.26	-1.66546	0.226158	-7.36417	1.78247e-13	5.58062e-12
ENSG00000119718	EIF2B2	3016.17	-1.76271	0.239367	-7.36406	1.78401e-13	5.58161e-12
ENSG00000089248	ERP29	10204.5	-1.41665	0.192404	-7.36287	1.8e-13	5.62779e-12
ENSG00000117419	ERI3	2013.14	-1.36692	0.185654	-7.36273	1.80186e-13	5.62975e-12
ENSG00000213380	COG8	983.471	-1.84769	0.250976	-7.36203	1.81134e-13	5.65553e-12
ENSG00000230629	RPS23P8	4568.56	-3.66743	0.498232	-7.3609	1.82674e-13	5.69973e-12
ENSG00000139428	MMAB	1629.81	-1.58652	0.21554	-7.36064	1.83031e-13	5.70699e-12
ENSG00000133943	DGLUCY	2637.21	-1.75284	0.23814	-7.36052	1.83201e-13	5.70838e-12
ENSG00000241464	RPL39P38	60.3457	-5.45849	0.741629	-7.36014	1.83715e-13	5.72052e-12
ENSG00000234982		20.374	-5.62416	0.764341	-7.35818	1.86433e-13	5.80122e-12
ENSG00000166086	JAM3	634.368	-3.22028	0.437677	-7.35766	1.87156e-13	5.81975e-12
ENSG00000230701	FBXW4P1	98.5393	-3.16643	0.430432	-7.35641	1.88928e-13	5.86688e-12
ENSG00000176563	CNTD1	268.013	-4.1407	0.562869	-7.35643	1.889e-13	5.86688e-12
ENSG00000282989	PDCL3P2	7.84346	-6.15316	0.836508	-7.35577	1.89837e-13	5.89111e-12
ENSG00000089063	TMEM23	8463.75	-1.44225	0.19608	-7.35541	1.90335e-13	5.90258e-12
ENSG00000079459	FDFT1	1270.14	-1.8299	0.248846	-7.35354	1.93024e-13	5.98192e-12
ENSG00000176533	GNG7	904.174	-1.74544	0.237419	-7.35173	1.95658e-13	6.05945e-12
ENSG00000275745	Y_RNA	1.04953	-5.39851	0.734514	-7.34978	1.98536e-13	6.14442e-12
ENSG00000242017	ALG1L15P	72.0381	-3.24909	0.442094	-7.34933	1.99206e-13	6.161e-12
ENSG00000197647	ZNF433	544.318	-2.15964	0.293895	-7.34834	2.00676e-13	6.20227e-12
ENSG00000258017		1102.48	4.47852	0.609716	7.34527	2.05348e-13	6.34239e-12
ENSG00000272106		1315.95	-2.34684	0.319551	-7.34418	2.07024e-13	6.38124e-12
ENSG00000233229	CNOT7P1	41.453	-4.84795	0.660098	-7.34429	2.06859e-13	6.38124e-12
ENSG00000248795		85.092	-3.94282	0.536863	-7.34419	2.07014e-13	6.38124e-12
ENSG00000115977		5683.41	-2.53164	0.344727	-7.34389	2.07472e-13	6.39075e-12
ENSG00000230449	RPL7P4	1.688	-5.18265	0.705983	-7.34105	2.11928e-13	6.52363e-12
ENSG00000248305		3.48039	-6.70828	0.913897	-7.34031	2.13106e-13	6.55449e-12
ENSG00000223877	RPS8P1	125.475	-4.77092	0.649968	-7.34024	2.13217e-13	6.55449e-12
ENSG00000200783	RN7SKP18	4.45937	-6.66496	0.908247	-7.33827	2.16374e-13	6.64708e-12
ENSG00000243007	RPL12P35	209.581	-4.10064	0.558884	-7.33718	2.18134e-13	6.69664e-12
ENSG00000236603	RANP1	165.865	-2.84593	0.388074	-7.33347	2.24274e-13	6.88053e-12
ENSG00000268400		8.84024	-5.88362	0.802308	-7.33337	2.2444e-13	6.88102e-12
ENSG00000008282	SYPL1	7929.85	-1.63784	0.223386	-7.33187	2.26961e-13	6.95367e-12
ENSG00000008283	CYB561	3904.88	-1.95798	0.267064	-7.33149	2.27614e-13	6.96435e-12
ENSG00000230964		6.20884	-4.45088	0.607084	-7.33157	2.27464e-13	6.96435e-12
ENSG00000133773	CCDC59	1470.96	-1.8133	0.247365	-7.33047	2.29345e-13	7.01263e-12
ENSG00000179412		3.74564	-7.34774	1.00243	-7.32993	2.3028e-13	7.03652e-12
ENSG00000233585		208.19	-3.9168	0.53441	-7.3292	2.31532e-13	7.07007e-12
ENSG00000280498		2.62886	-4.14105	0.565017	-7.32909	2.31727e-13	7.07129e-12
ENSG00000198416	ZNF658B	284.826	-2.50084	0.341225	-7.329	2.31883e-13	7.07134e-12
ENSG00000244295	RPS2P21	19.1944	-4.62131	0.630664	-7.32768	2.34163e-13	7.13613e-12
ENSG00000177640	CASC2	408.214	-2.26531	0.309174	-7.32697	2.35419e-13	7.16962e-12
ENSG00000196972	SMIM1L2B	179.321	-2.54134	0.34689	-7.32606	2.37013e-13	7.2134e-12
ENSG00000234040	RPL1P12	30.3837	-4.14263	0.565514	-7.32542	2.38147e-13	7.24308e-12
ENSG00000147164	SNX12	3050.02	-1.61466	0.220439	-7.32474	2.39366e-13	7.27532e-12
ENSG00000274499		7.69608	-4.33714	0.592143	-7.32447	2.39841e-13	7.28494e-12
ENSG00000201428	RN7SKP71	56.4434	-3.90075	0.532652	-7.32326	2.42023e-13	7.34633e-12
ENSG00000213558	HMGN2P32	15.4312	-7.40655	1.01139	-7.32313	2.42254e-13	7.34848e-12
ENSG00000261770		95.2529	-3.70537	0.50602	-7.32258	2.43242e-13	7.37357e-12
ENSG00000216977	RPL21P65	9.79327	-6.20238	0.847056	-7.32228	2.43794e-13	7.38541e-12
ENSG00000284310	MIR939	2.65987	-4.04801	0.552857	-7.32199	2.44325e-13	7.39661e-12
ENSG00000273080		21.387	-3.02284	0.412935	-7.32038	2.47265e-13	7.48067e-12
ENSG00000105404	RABAC1	2619.81	-1.44583	0.197534	-7.3194	2.49085e-13	7.53076e-12
ENSG00000224126	UBE2SP2	67.4575	-2.87247	0.392531	-7.31782	2.52025e-13	7.61463e-12
ENSG00000258608	DNAJC19P9	162.052	-3.2169	0.439647	-7.31701	2.5356e-13	7.65593e-12
ENSG00000234608	MAPKAPK5-AS1	543.061	-2.39296	0.327074	-7.31628	2.54943e-13	7.69262e-12
ENSG00000120509	PDZD11	2048.64	-1.46042	0.199626	-7.31579	2.55863e-13	7.7153e-12
ENSG00000228847	ATP5MC2P4	276.455	-3.47849	0.475499	-7.31545	2.56517e-13	7.72995e-12
ENSG00000221676	RNU6ATAC	3.75839	-4.06202	0.555303	-7.31496	2.57464e-13	7.75336e-12
ENSG00000228212	OFD1P17	85.3027	-4.06983	0.556381	-7.31483	2.5771e-13	7.7557e-12
ENSG00000235677	NPM1P26	59.1151	-4.37697	0.598386	-7.31464	2.5808e-13	7.76173e-12
ENSG00000244289	RPS3AP35	8.01441	-5.79595	0.79241	-7.31433	2.58678e-13	7.7746e-12
ENSG00000158480	SPATA2	1185.12	-1.9925	0.272423	-7.31399	2.59325e-13	7.78384e-12
ENSG00000100372	SLC25A17	1314.06	-1.96278	0.268357	-7.31407	2.59175e-13	7.78384e-12
ENSG00000235618	FAM21EP	78.4842	-2.55241	0.349001	-7.31348	2.60318e-13	7.80853e-12
ENSG00000129084	PSMA1	4393.48	-1.72799	0.236301	-7.31266	2.61897e-13	7.85072e-12
ENSG00000239374		121.307	-5.02252	0.686881	-7.31206	2.63074e-13	7.88085e-12
ENSG00000223391	RDXP2	9.96328	-7.20327	0.985355	-7.31033	2.66484e-13	7.9778e-12
ENSG00000226121	AHCTF1P1	649.59	-2.75713	0.377161	-7.31021	2.6672e-13	7.97963e-12
ENSG00000282886	PTMAP12	228.153	-4.61617	0.631549	-7.30929	2.68555e-13	8.02929e-12
ENSG00000205643	CDPF1	459.446	-1.82359	0.249568	-7.30699	2.73189e-13	8.16252e-12
ENSG00000169567	HINT1	8574.61	-1.64922	0.225719	-7.30651	2.74175e-13	8.1813e-12
ENSG00000066697	MSANTD3	880.23	-1.85311	0.253624	-7.30655	2.74088e-13	8.1813e-12
ENSG00000236565	HNRNPA3P5	314.729	-3.19402	0.437159	-7.30631	2.74569e-13	8.18775e-12
ENSG00000197933	ZNF823	355.222	-2.09409	0.286625	-7.30601	2.75192e-13	8.19906e-12
ENSG00000196655	TRAPPC4	1015.13	-1.79823	0.246132	-7.30595	2.75307e-13	8.19906e-12
ENSG00000198546	ZNF511	1067.4	-1.60032	0.219062	-7.30532	2.766e-13	8.23222e-12
ENSG00000138069	RAB1A	6431.23	-2.18778	0.2995	-7.30477	2.77733e-13	8.26057e-12
ENSG00000271797		21.5727	-2.59597	0.35539	-7.30457	2.78159e-13	8.26788e-12
ENSG00000213385		190.417	-4.55322	0.623416	-7.30366	2.8005e-13	8.31868e-12
ENSG00000172974	VDAC2P5	2163.89	-1.75948	0.240934	-7.30274	2.81976e-13	8.37045e-12
ENSG00000108733	PEX12	723.622	-1.82583	0.250036	-7.30225	2.82996e-13	8.39531e-12
ENSG00000187824	TMEM22	815.691	-2.32002	0.317726	-7.30196	2.83614e-13	8.4082e-12
ENSG00000105058	FAM32A	3477.78	-1.45074	0.198713	-7.3007	2.86266e-13	8.48131e-12
ENSG00000215441	CTAGE12P	32.7676	-4.31993	0.591825	-7.29934	2.89182e-13	8.56218e-12
ENSG00000259479	SORD2P	6026.44	-2.86929	0.393163	-7.29796	2.92158e-13	8.64471e-12
ENSG00000207165	SNORA7	2.61235	-4.10369	0.562385	-7.29693	2.94398e-13	8.70537e-12
ENSG00000007255	TRAPPC6A	972.733	-1.77817	0.243726	-7.29578	2.96927e-13	8.76881e-12
ENSG00000006194	ZNF263	1041.38	-2.51288	0.344427	-7.29583	2.96833e-13	8.76881e-12
ENSG00000230406	RPL23P5	15.1935	-6.21228	0.851697	-7.294	3.00877e-13	8.87974e-12
ENSG00000002919	SNX11	1822.41	-1.74438	0.239166	-7.29358	3.01823e-13	8.90194e-12
ENSG00000240366	RPL36AP45	80.6573	-5.26208	0.721571	-7.29254	3.04161e-13	8.96512e-12
ENSG00000231726	HMGN2P38	4.38479	-6.62585	0.9086	-7.29237	3.0455e-13	8.96772e-12
ENSG00000278221	MIR6511A2	1.54812	-4.18515	0.573912	-7.29233	3.04641e-13	8.96772e-12
ENSG00000112110	MRPL18	2280.44	-1.54309	0.211629	-7.2915	3.0653e-13	9.01754e-12
ENSG00000267319	SELENOKP1	30.5849	-3.65855	0.501858	-7.29002	3.09908e-13	9.1052e-12
ENSG00000111850	SMIM8	497.992	-1.80069	0.247007	-7.29006	3.09815e-13	9.1052e-12
ENSG00000242808	SOX2-OT	53.7185	-2.65407	0.364109	-7.2892	3.11799e-13	9.15491e-12
ENSG00000141401	IMPA2	985.447	-2.36823	0.324905	-7.28897	3.12322e-13	9.16439e-12
ENSG00000179918	SEPHS2	4194.56	-1.38974	0.190672	-7.28865	3.13087e-13	9.18095e-12
ENSG00000166770	ZNF667-AS1	1822.01	-1.93857	0.265985	-7.28825	3.13997e-13	9.20173e-12
ENSG00000283844	MIR214	2.5822	-3.97118	0.544942	-7.28734	3.16133e-13	9.25841e-12
ENSG00000102974	CTCF	1884.66	-2.12054	0.291043	-7.28602	3.19246e-13	9.34359e-12
ENSG00000179010	MRFAP1	14487.2	-1.96443	0.269663	-7.28476	3.22237e-13	9.42513e-12
ENSG00000232963	HMGN2P2	6.07733	-5.45796	0.749265	-7.28442	3.23065e-13	9.44331e-12
ENSG00000233579		19.956	-6.10129	0.837592	-7.28432	3.23296e-13	9.44405e-12
ENSG00000022267	FHL1	14445	-3.14293	0.431477	-7.28412	3.23787e-13	9.45236e-12
ENSG00000237793	RPL18AP16	19.0468	-6.89392	0.946487	-7.28369	3.24809e-13	9.47069e-12
ENSG00000231434	HSP9AA3P	254.705	-5.10402	0.700748	-7.28368	3.24829e-13	9.47069e-12
ENSG00000224094	RPS24P8	1239.65	-4.06493	0.558168	-7.28263	3.27367e-13	9.53862e-12
ENSG00000213514		99.0109	-3.303	0.453606	-7.28166	3.29749e-13	9.60191e-12
ENSG00000254481	PTP4A2P2	62.3451	-3.50839	0.481835	-7.28132	3.3058e-13	9.61391e-12
ENSG00000162755	KLHDC9	567.666	-1.76722	0.242704	-7.2814	3.3038e-13	9.61391e-12
ENSG00000108958		227.892	-2.5635	0.352093	-7.28076	3.31957e-13	9.64781e-12
ENSG00000047648	ARHGAP6	2585.42	-2.38039	0.326995	-7.27958	3.3485e-13	9.72572e-12
ENSG00000212238	RNA5SP244	3.68356	-3.86191	0.530527	-7.27938	3.35346e-13	9.73395e-12
ENSG00000093167	LRRFIP2	2485.85	-1.97088	0.270846	-7.27676	3.41932e-13	9.91885e-12
ENSG00000100138	SNU13	5831.61	-1.88521	0.25908	-7.27657	3.4242e-13	9.92672e-12
ENSG00000146416	AIG1	3138.39	-1.61324	0.221716	-7.27618	3.43396e-13	9.94871e-12
ENSG00000171202	TMEM126A	892.023	-1.42974	0.19651	-7.27569	3.44662e-13	9.97908e-12
ENSG00000171791	BCL2	5373.24	-2.70497	0.371797	-7.27541	3.45382e-13	9.99359e-12
ENSG00000166821	PEX11A	809.56	-2.2885	0.314591	-7.27453	3.47624e-13	1.00521e-11
ENSG00000272134		2.29923	-4.80283	0.660306	-7.27365	3.49903e-13	1.01116e-11
ENSG00000161920	MED11	916.116	-1.41616	0.194706	-7.27331	3.50792e-13	1.01246e-11
ENSG00000224117	PTPN2P2	19.4556	-5.10418	0.701761	-7.27338	3.50591e-13	1.01246e-11
ENSG00000237115		49.398	-3.69433	0.507996	-7.27235	3.53278e-13	1.01899e-11
ENSG00000245556	SCAMP1-AS1	671.444	-1.7718	0.243685	-7.27086	3.57214e-13	1.02969e-11
ENSG00000283791	MIR612	2.63743	-4.11971	0.566776	-7.26868	3.63024e-13	1.04578e-11
ENSG00000239617	RPL32P27	103.889	-4.92469	0.677567	-7.2682	3.64317e-13	1.04885e-11
ENSG00000179958	DCTPP1	1072.09	-1.62227	0.223224	-7.26744	3.66372e-13	1.0541e-11
ENSG00000260087	PCMTD1P2	8.03128	-4.93651	0.679306	-7.26698	3.67605e-13	1.05698e-11
ENSG00000285268		6.99873	-4.48701	0.617477	-7.26669	3.68406e-13	1.05796e-11
ENSG00000233830	EIF4HP1	576.026	-2.79364	0.384445	-7.2667	3.68366e-13	1.05796e-11
ENSG00000128463	EMC4	3523.54	-1.44964	0.199501	-7.26635	3.69334e-13	1.05996e-11
ENSG00000117410	ATP6VB	4159.07	-1.2783	0.175923	-7.26626	3.69585e-13	1.06002e-11
ENSG00000284469	MIR6721	2.21158	-4.73024	0.650999	-7.26612	3.69955e-13	1.06042e-11
ENSG00000277842		1.42468	-4.75846	0.654901	-7.26593	3.70483e-13	1.06126e-11
ENSG00000250731	TPM3P6	36.2021	-2.76851	0.381125	-7.26405	3.75667e-13	1.07544e-11
ENSG00000150756	ATPSCKMT	722.928	-1.76145	0.242552	-7.26213	3.81033e-13	1.08944e-11
ENSG00000104341	LAPTM4B	2090.14	-2.47781	0.341195	-7.26215	3.80979e-13	1.08944e-11
ENSG00000184436	THAP7	989.458	-1.64223	0.226142	-7.26194	3.81578e-13	1.09032e-11
ENSG00000276259		180.783	-3.27146	0.450501	-7.26183	3.81889e-13	1.09053e-11
ENSG00000281912	LINC1144	146.586	-2.39263	0.329488	-7.26166	3.82382e-13	1.09125e-11
ENSG00000268620		13.7775	-3.91566	0.539249	-7.26133	3.83293e-13	1.09317e-11
ENSG00000234800	PCMTD1P3	7.14709	-4.90887	0.676055	-7.26105	3.84106e-13	1.09481e-11
ENSG00000215835		253.322	-3.31758	0.456908	-7.26094	3.84414e-13	1.09501e-11
ENSG00000241030	RPL29P24	57.8396	-5.41769	0.746218	-7.2602	3.86527e-13	1.10034e-11
ENSG00000150991	UBC	40157.6	-2.59135	0.356949	-7.25972	3.87892e-13	1.10286e-11
ENSG00000138073	PREB	1860.61	-1.8345	0.252695	-7.25972	3.87885e-13	1.10286e-11
ENSG00000215583	ASS1P6	3.24935	-6.15495	0.848082	-7.2575	3.94321e-13	1.12044e-11
ENSG00000229700		36.8712	-5.14895	0.709599	-7.25614	3.98281e-13	1.13099e-11
ENSG00000238942	SNORD2	2.84909	-4.28643	0.590746	-7.25596	3.98812e-13	1.1318e-11
ENSG00000166272	WBP1L	6818.3	-1.99278	0.274648	-7.25577	3.99375e-13	1.13269e-11
ENSG00000163155	LYSMD1	645.002	-1.88618	0.260006	-7.25436	4.03557e-13	1.14384e-11
ENSG00000228878	SEPTIN7-DT	166.362	-2.63636	0.363424	-7.25423	4.03948e-13	1.14425e-11
ENSG00000136197	C7orf25	701.896	-2.14448	0.295672	-7.25292	4.07894e-13	1.15437e-11
ENSG00000249934	NCOA4P2	6.55955	-5.59171	0.770964	-7.25287	4.08027e-13	1.15437e-11
ENSG00000119703	ZC2HC1C	543.801	-1.9006	0.262079	-7.25203	4.10569e-13	1.16085e-11
ENSG00000153140	CETN3	940.146	-1.86872	0.257706	-7.25135	4.12636e-13	1.16597e-11
ENSG00000227578	RPS3AP53	11.0001	-4.5337	0.625276	-7.25072	4.14547e-13	1.17065e-11
ENSG00000189046	ALKBH2	483.347	-1.69112	0.233277	-7.24941	4.18605e-13	1.18138e-11
ENSG00000253982		362.307	-1.73899	0.239885	-7.24928	4.19005e-13	1.18178e-11
ENSG00000143612	C1orf43	7672.88	-1.6965	0.234063	-7.24804	4.22845e-13	1.19188e-11
ENSG00000184612	RPL7P26	220.609	-5.46332	0.753781	-7.24789	4.23313e-13	1.19246e-11
ENSG00000240821	RPL9P25	417.634	-4.17307	0.575781	-7.24766	4.24023e-13	1.19373e-11
ENSG00000250273	PSMC1P5	71.1523	-4.5747	0.631312	-7.24634	4.28191e-13	1.20472e-11
ENSG00000212747	RTL8B	760.302	-1.75904	0.242757	-7.24609	4.28977e-13	1.20619e-11
ENSG00000147419	CCDC25	2531.65	-1.96465	0.27115	-7.24563	4.30437e-13	1.20955e-11
ENSG00000143416	SELENBP1	8574.1	-2.40827	0.332414	-7.24481	4.33048e-13	1.21614e-11
ENSG00000182899	RPL35A	29400.3	-1.77325	0.244769	-7.24458	4.33773e-13	1.21744e-11
ENSG00000141232	TOB1	3717.65	-2.53684	0.350216	-7.24364	4.36786e-13	1.22514e-11
ENSG00000247934		279.59	-2.21609	0.305966	-7.24292	4.39115e-13	1.23092e-11
ENSG00000164587	RPS14	39183.9	-1.58247	0.218519	-7.24178	4.42841e-13	1.24061e-11
ENSG00000248640	HNRNPA1P56	11.1277	-7.27145	1.00433	-7.24013	4.48239e-13	1.25496e-11
ENSG00000279809		109.773	-3.16396	0.437034	-7.23962	4.49939e-13	1.25895e-11
ENSG00000225644	RPL35AP4	2.80751	-6.73637	0.930555	-7.23909	4.51713e-13	1.26314e-11
ENSG00000249031	SUMO2P6	156.926	-2.37331	0.327877	-7.23842	4.53926e-13	1.26856e-11
ENSG00000185798	WDR53	420.381	-1.96222	0.271109	-7.23774	4.56229e-13	1.27421e-11
ENSG00000259086	KIAA1143P1	68.7511	-2.41575	0.333781	-7.23753	4.5693e-13	1.2754e-11
ENSG00000106638	TBL2	1982.98	-1.69069	0.23367	-7.23537	4.64269e-13	1.29509e-11
ENSG00000273893		44.8796	-2.27723	0.31475	-7.23506	4.65319e-13	1.29723e-11
ENSG00000213205	STRADBP1	26.3915	-3.52196	0.486797	-7.23497	4.65616e-13	1.29727e-11
ENSG00000131174	COX7B	5306.65	-1.58818	0.219519	-7.23484	4.66075e-13	1.29776e-11
ENSG00000230056	DDX6P1	2.04792	-6.89655	0.953279	-7.23456	4.67047e-13	1.29967e-11
ENSG00000157150	TIMP4	65.2583	-3.48122	0.481215	-7.23423	4.68188e-13	1.30206e-11
ENSG00000159377	PSMB4	7615.14	-1.57713	0.218017	-7.23395	4.69139e-13	1.30391e-11
ENSG00000254406		10.97	-5.10268	0.705441	-7.23332	4.71324e-13	1.30919e-11
ENSG00000221933	OR2A25	3.84486	-5.31788	0.735384	-7.23143	4.77949e-13	1.32518e-11
ENSG00000226342	NMD3P1	32.8701	-4.05875	0.561265	-7.23144	4.77916e-13	1.32518e-11
ENSG00000233028		54.2314	-4.05078	0.56016	-7.23148	4.77752e-13	1.32518e-11
ENSG00000279392		254.401	-2.94266	0.40701	-7.22993	4.83235e-13	1.33902e-11
ENSG00000133318	RTN3	13261.4	-2.03265	0.281154	-7.22969	4.841e-13	1.34061e-11
ENSG00000261336	EIF4BP5	38.0706	-4.59111	0.63521	-7.22771	4.9122e-13	1.35951e-11
ENSG00000261069		2.8432	-4.20895	0.582427	-7.22657	4.95339e-13	1.37008e-11
ENSG00000237550		16662	-1.97629	0.2735	-7.2259	4.97796e-13	1.37604e-11
ENSG00000207241		2.02003	-4.07771	0.564354	-7.22545	4.99444e-13	1.37977e-11
ENSG00000273945	MIR6853	2.14788	-4.84818	0.671034	-7.22494	5.01327e-13	1.38413e-11
ENSG00000255642	PABPC1P4	429.587	-3.72305	0.515427	-7.22324	5.07651e-13	1.40075e-11
ENSG00000143156	NME7	938.748	-2.11481	0.292924	-7.21963	5.21291e-13	1.43752e-11
ENSG00000116194	ANGPTL1	1824.99	-3.13846	0.434764	-7.21878	5.24578e-13	1.44571e-11
ENSG00000162385	MAGOH	1535.03	-1.95688	0.271113	-7.21793	5.27852e-13	1.45386e-11
ENSG00000102409	BEX4	6725.35	-2.10486	0.291661	-7.2168	5.32234e-13	1.46505e-11
ENSG00000260010	ZNF72P1	6.05785	-4.79189	0.664023	-7.21645	5.33618e-13	1.46798e-11
ENSG00000230207	RPL4P5	1785.83	-4.43925	0.615185	-7.21612	5.349e-13	1.47062e-11
ENSG00000215221	UBA52P6	23.2171	-6.16196	0.854049	-7.215	5.39333e-13	1.48192e-11
ENSG00000214132		15.8576	-4.30292	0.596448	-7.21425	5.42337e-13	1.48928e-11
ENSG00000284087	MIR6844	2.26416	-4.18674	0.580387	-7.2137	5.445e-13	1.49432e-11
ENSG00000177283	FZD8	1028.31	-2.23172	0.3094	-7.21307	5.4705e-13	1.50042e-11
ENSG00000254837		563.661	-1.94798	0.27009	-7.21235	5.49958e-13	1.5066e-11
ENSG00000099330	OCEL1	503.171	-1.58306	0.219491	-7.21241	5.49714e-13	1.5066e-11
ENSG00000176396	EID2	942.568	-1.4021	0.194467	-7.20995	5.59742e-13	1.53248e-11
ENSG00000185078	RPL9P14	10.8383	-7.20051	0.998741	-7.20959	5.61215e-13	1.5356e-11
ENSG00000117450	PRDX1	27883.8	-2.1167	0.293619	-7.20898	5.63742e-13	1.54101e-11
ENSG00000283813	MIR4485	2.32293	-4.13707	0.573881	-7.20895	5.63865e-13	1.54101e-11
ENSG00000157978	LDLRAP1	960.651	-2.66637	0.369899	-7.20838	5.66229e-13	1.54654e-11
ENSG00000113946	CLDN16	5507.52	6.00289	0.832788	7.20819	5.67007e-13	1.54775e-11
ENSG00000224993	RPL29P12	328.211	-4.94228	0.685706	-7.20759	5.69526e-13	1.5537e-11
ENSG00000163634	THOC7	1729.82	-1.69443	0.235154	-7.20565	5.77688e-13	1.57503e-11
ENSG00000279805		30.8656	-2.98906	0.414826	-7.20556	5.7805e-13	1.57507e-11
ENSG00000198783	ZNF83	1045.75	-1.85535	0.257526	-7.20451	5.82546e-13	1.58548e-11
ENSG00000257195	HNRNPA1P5	80.9892	-4.82938	0.670329	-7.2045	5.82561e-13	1.58548e-11
ENSG00000204673	AKT1S1	2306.73	-1.32099	0.183359	-7.20441	5.82939e-13	1.58557e-11
ENSG00000110060	PUS3	605.761	-1.71587	0.238185	-7.20395	5.8492e-13	1.59001e-11
ENSG00000136527	TRA2B	5587.46	-2.36834	0.328773	-7.20359	5.86482e-13	1.59331e-11
ENSG00000231203	KRT8P1	118.922	-4.05855	0.563414	-7.20349	5.86896e-13	1.59349e-11
ENSG00000100124	ANKRD54	1399.89	-1.75447	0.243563	-7.20334	5.87554e-13	1.59433e-11
ENSG00000283728	MIR718	1.25864	-4.51738	0.627152	-7.20301	5.88981e-13	1.59726e-11
ENSG00000235001	EIF4A1P2	317.591	-3.51595	0.488133	-7.20285	5.89684e-13	1.59822e-11
ENSG00000284276	MIR48	2.69009	-3.92138	0.544427	-7.20277	5.90032e-13	1.59822e-11
ENSG00000112658	SRF	3415.18	-2.40218	0.333543	-7.202	5.93361e-13	1.60628e-11
ENSG00000095485	CWF19L1	1242.08	-1.93789	0.269081	-7.20189	5.93815e-13	1.60656e-11
ENSG00000237984	PTENP1	408.328	-2.79748	0.38845	-7.20165	5.94896e-13	1.60854e-11
ENSG00000234004		542.764	-4.95574	0.688226	-7.20075	5.98816e-13	1.61818e-11
ENSG00000198721	ECI2	2526.86	-1.57678	0.219005	-7.19974	6.03271e-13	1.62926e-11
ENSG00000157014	TATDN2	2342.89	-2.08706	0.289903	-7.19916	6.05846e-13	1.63525e-11
ENSG00000170153	RNF15	1085.9	-2.99306	0.415805	-7.19824	6.09963e-13	1.64482e-11
ENSG00000255200	PGAM1P8	100.477	-3.28634	0.456553	-7.19814	6.10399e-13	1.64482e-11
ENSG00000105968	H2AZ2	6491.43	-1.87104	0.259934	-7.19812	6.10468e-13	1.64482e-11
ENSG00000260095		26.6706	-3.00866	0.418004	-7.19768	6.12444e-13	1.64917e-11
ENSG00000256745	ARPC3P3	703.737	-2.44739	0.340038	-7.1974	6.13699e-13	1.65133e-11
ENSG00000196652	ZKSCAN5	975.614	-1.87135	0.260005	-7.19734	6.13968e-13	1.65133e-11
ENSG00000260007		294.179	-3.96038	0.550269	-7.19717	6.14769e-13	1.65252e-11
ENSG00000018869	ZNF582	406.061	-2.10596	0.292617	-7.19699	6.15551e-13	1.65365e-11
ENSG00000284011	MIR652	2.03279	-3.94563	0.548335	-7.19565	6.21634e-13	1.66901e-11
ENSG00000157514	TSC22D3	10192.4	-2.78203	0.386634	-7.19551	6.22275e-13	1.66975e-11
ENSG00000243317	STMP1	3336.45	-1.56589	0.217656	-7.19434	6.27617e-13	1.6831e-11
ENSG00000258788	CKS1BP1	9.93385	-3.93506	0.54702	-7.19364	6.30862e-13	1.68983e-11
ENSG00000175416	CLTB	3404.22	-1.29745	0.18036	-7.19368	6.30674e-13	1.68983e-11
ENSG00000105669	COPE	5298.89	-1.1806	0.16414	-7.19264	6.3551e-13	1.70128e-11
ENSG00000156515	HK1	7851.48	-1.98742	0.276325	-7.19233	6.36972e-13	1.7042e-11
ENSG00000257813		12.3529	-6.0543	0.841805	-7.19204	6.38305e-13	1.70577e-11
ENSG00000101460	MAP1LC3A	907.206	-1.98914	0.276574	-7.19205	6.38268e-13	1.70577e-11
ENSG00000184117	NIPSNAP1	1399.56	-2.45452	0.341288	-7.19192	6.38852e-13	1.70624e-11
ENSG00000198153	ZNF849P	10.0722	-4.34779	0.604561	-7.19164	6.40172e-13	1.70877e-11
ENSG00000121361	KCNJ8	804.402	-2.35989	0.328161	-7.19126	6.41955e-13	1.71253e-11
ENSG00000130513	GDF15	4241.8	4.24097	0.589921	7.18905	6.52434e-13	1.73947e-11
ENSG00000248546	ANP32C	51.9907	-4.51613	0.628266	-7.18824	6.56334e-13	1.74864e-11
ENSG00000158042	MRPL17	2577.62	-1.49012	0.207302	-7.18817	6.56635e-13	1.74864e-11
ENSG00000174109	C16orf91	451.826	-1.34733	0.187475	-7.18675	6.6351e-13	1.76592e-11
ENSG00000184515	BEX5	940.066	-2.28564	0.31807	-7.18596	6.67362e-13	1.77514e-11
ENSG00000184900	SUMO3	5485.99	-1.70284	0.237004	-7.18484	6.72875e-13	1.78876e-11
ENSG00000005243	COPZ2	899.882	-2.0907	0.291024	-7.18395	6.77238e-13	1.79932e-11
ENSG00000235742		11.404	-6.27256	0.873173	-7.18365	6.78762e-13	1.80151e-11
ENSG00000226082		70.3769	-5.22986	0.728025	-7.18363	6.78849e-13	1.80151e-11
ENSG00000163479	SSR2	5454.75	-1.96375	0.273377	-7.18331	6.80415e-13	1.80462e-11
ENSG00000284498	MIR564	2.00651	-3.58242	0.498814	-7.18188	6.87592e-13	1.8226e-11
ENSG00000088970	KIZ	1481.68	-2.21298	0.308152	-7.18146	6.89717e-13	1.82717e-11
ENSG00000242607	RPS3AP34	61.8146	-5.6802	0.791103	-7.1801	6.96627e-13	1.84441e-11
ENSG00000102158	MAGT1	6306.62	-1.93136	0.268993	-7.17995	6.97384e-13	1.84535e-11
ENSG00000223873		45.7682	-4.94799	0.689254	-7.17877	7.03413e-13	1.86023e-11
ENSG00000141552	ANAPC11	2210.26	-1.16378	0.162154	-7.17701	7.12518e-13	1.88322e-11
ENSG00000248155		9.14699	-5.73521	0.799329	-7.17504	7.22874e-13	1.90949e-11
ENSG00000213406	ANXA2P1	262.71	-3.4004	0.473992	-7.17397	7.28554e-13	1.92338e-11
ENSG00000153823	PID1	303.24	-3.76055	0.524236	-7.17338	7.3169e-13	1.93055e-11
ENSG00000233947	ASS1P3	33.5316	-5.20776	0.726048	-7.17276	7.35023e-13	1.93823e-11
ENSG00000213386		13.5172	-3.38484	0.471925	-7.17242	7.36844e-13	1.94191e-11
ENSG00000213344	PCNPP3	15.1343	-3.80617	0.530873	-7.16964	7.51927e-13	1.98029e-11
ENSG00000272156		51.6131	-2.42318	0.33798	-7.16958	7.52272e-13	1.98029e-11
ENSG00000271741		390.778	-4.81257	0.671293	-7.16911	7.54846e-13	1.98593e-11
ENSG00000186940	CHCHD2P9	176.836	-2.14586	0.299337	-7.16869	7.57173e-13	1.9909e-11
ENSG00000183171		123.858	-3.24174	0.45223	-7.16834	7.59148e-13	1.99495e-11
ENSG00000235787	RPL35AP8	6.98333	-7.56526	1.05541	-7.1681	7.60467e-13	1.99727e-11
ENSG00000004478	FKBP4	7140.09	-1.56743	0.218702	-7.16697	7.66741e-13	2.01144e-11
ENSG00000258940		93.2913	-2.24221	0.312852	-7.167	7.66597e-13	2.01144e-11
ENSG00000140577	CRTC3	2570.9	-2.24948	0.313882	-7.16664	7.68624e-13	2.01523e-11
ENSG00000267317		240.099	-1.74387	0.243369	-7.16553	7.74844e-13	2.03037e-11
ENSG00000199645	RNU6-133P	2.36891	-3.67133	0.512444	-7.16434	7.8162e-13	2.04462e-11
ENSG00000214046	SMIM7	1955.7	-1.86555	0.260389	-7.16446	7.80918e-13	2.04462e-11
ENSG00000284163	MIR362	2.07116	-3.70921	0.51773	-7.16437	7.81451e-13	2.04462e-11
ENSG00000118894	EEF2KMT	854.493	-1.34128	0.187223	-7.16407	7.83158e-13	2.04747e-11
ENSG00000255471		84.6599	-2.25086	0.31424	-7.16286	7.90103e-13	2.06445e-11
ENSG00000259707		24.0476	-5.08311	0.709658	-7.16276	7.90698e-13	2.06483e-11
ENSG00000283726	MIR5193	2.86646	-4.12432	0.575854	-7.16209	7.94581e-13	2.07379e-11
ENSG00000250896	RNPS1P1	214.094	-3.67233	0.51281	-7.16119	7.9979e-13	2.08619e-11
ENSG00000125166	GOT2	5788.47	-1.31288	0.183374	-7.15958	8.09262e-13	2.1097e-11
ENSG00000162873	KLHDC8A	2120.74	4.33219	0.605128	7.15912	8.11966e-13	2.11555e-11
ENSG00000225912	RPL26P36	460.58	-4.89747	0.684112	-7.15888	8.13388e-13	2.11799e-11
ENSG00000201558	RNVU1-6	19.6904	-7.81112	1.09112	-7.15881	8.1383e-13	2.11799e-11
ENSG00000188459	WASF4P	73.4516	-4.16556	0.581971	-7.15768	8.20514e-13	2.13297e-11
ENSG00000182993	C12orf6	109.308	-2.19397	0.306518	-7.15774	8.20205e-13	2.13297e-11
ENSG00000204705	UBTFL5	5.78236	-3.77323	0.527177	-7.15742	8.22121e-13	2.13537e-11
ENSG00000234797	RPS3AP6	12940.1	-2.43752	0.340561	-7.15737	8.2237e-13	2.13537e-11
ENSG00000196290		966.326	-1.77274	0.247718	-7.15631	8.28765e-13	2.15075e-11
ENSG00000251235	SNRPCP2	56.4439	-4.30956	0.602225	-7.15606	8.30287e-13	2.15348e-11
ENSG00000268282		53.972	-3.88609	0.543137	-7.1549	8.3735e-13	2.17057e-11
ENSG00000090263	MRPS33	1602.82	-1.53231	0.214175	-7.15447	8.39962e-13	2.17611e-11
ENSG00000065675	PRKCQ	1418.39	-2.25536	0.315272	-7.1537	8.44672e-13	2.18708e-11
ENSG00000228960	OR2A9P	374.458	-2.7828	0.389022	-7.15332	8.47049e-13	2.19199e-11
ENSG00000132664	POLR3F	900.154	-1.83363	0.256353	-7.15277	8.50456e-13	2.19832e-11
ENSG00000235043	TECRP1	541.894	-2.86565	0.400635	-7.15277	8.50427e-13	2.19832e-11
ENSG00000196378	ZNF34	352.668	-2.58511	0.361447	-7.15213	8.54442e-13	2.20614e-11
ENSG00000124097	HMGB1P1	233.505	-4.30332	0.60168	-7.15217	8.54139e-13	2.20614e-11
ENSG00000184227	ACOT1	679.762	-1.41897	0.198409	-7.15172	8.5696e-13	2.21015e-11
ENSG00000116903	EXOC8	1673.53	-2.09795	0.293349	-7.15173	8.56907e-13	2.21015e-11
ENSG00000069509	FUNDC1	986.849	-1.55403	0.217314	-7.15108	8.60993e-13	2.2193e-11
ENSG00000227203	SUB1P1	73.3272	-4.16496	0.582462	-7.15062	8.63892e-13	2.22552e-11
ENSG00000236972	FABP5P1	49.6781	-4.02579	0.56305	-7.14998	8.67894e-13	2.23457e-11
ENSG00000258568	RHOQP1	43.667	-2.90353	0.406162	-7.14871	8.75946e-13	2.25403e-11
ENSG00000257070		4.54594	-6.06523	0.848459	-7.14853	8.77114e-13	2.25577e-11
ENSG00000220583	RPL35P2	427.482	-3.83467	0.536469	-7.14798	8.80668e-13	2.26364e-11
ENSG00000214199	EEF1A1P12	4937.14	-4.88391	0.683364	-7.14686	8.87885e-13	2.28091e-11
ENSG00000280087		121.564	-4.80278	0.672098	-7.14596	8.93693e-13	2.29455e-11
ENSG00000159348	CYB5R1	2738.48	-1.69115	0.23667	-7.14559	8.96071e-13	2.29936e-11
ENSG00000229419	RALGAPA1P1	548.767	-2.655	0.371644	-7.14394	9.06944e-13	2.32596e-11
ENSG00000228196	PTPN2P1	66.0446	-3.21327	0.449796	-7.14384	9.0762e-13	2.32639e-11
ENSG00000225573	RPL35P5	722.204	-4.57381	0.640278	-7.14347	9.10038e-13	2.33128e-11
ENSG00000223886		82.1332	-4.0697	0.569913	-7.14091	9.27144e-13	2.37378e-11
ENSG00000125352	RNF113A	819.699	-1.57889	0.221115	-7.14059	9.29311e-13	2.37751e-11
ENSG00000274680	MYO5BP1	37.0531	-3.81572	0.534374	-7.14054	9.2964e-13	2.37751e-11
ENSG00000172809	RPL38	16352.7	-1.6209	0.227006	-7.14031	9.31192e-13	2.38015e-11
ENSG00000216636	RPL7P25	3.92281	-6.31498	0.884441	-7.14008	9.32747e-13	2.3828e-11
ENSG00000280339		329.539	-2.66257	0.372918	-7.13983	9.34434e-13	2.38578e-11
ENSG00000238165		65.1837	-3.93632	0.551367	-7.1392	9.38725e-13	2.3954e-11
ENSG00000234217	RBPJP7	8.07731	-5.18091	0.725719	-7.13899	9.40165e-13	2.39773e-11
ENSG00000200237	SNORA7	8.91216	-5.03804	0.705728	-7.13879	9.41575e-13	2.39999e-11
ENSG00000224837	GCSHP5	933.752	-2.59218	0.363138	-7.13829	9.45015e-13	2.40742e-11
ENSG00000254373		271.159	-3.89914	0.546315	-7.13716	9.5281e-13	2.42593e-11
ENSG00000284122	MIR6717	1.99374	-3.67992	0.515645	-7.13653	9.57134e-13	2.43559e-11
ENSG00000227755		4.09728	-4.34757	0.609207	-7.13644	9.57802e-13	2.43593e-11
ENSG00000270781		6.23772	-4.61555	0.646814	-7.13582	9.62129e-13	2.44558e-11
ENSG00000233859	ADH5P4	147.39	-4.4858	0.62866	-7.1355	9.64387e-13	2.44996e-11
ENSG00000270959	LPP-AS2	84.0413	-2.46714	0.345779	-7.13503	9.6766e-13	2.45691e-11
ENSG00000207500	SNORD12	2.67814	-4.14288	0.580694	-7.13436	9.72408e-13	2.4676e-11
ENSG00000284280	MIR6843	2.70847	-4.14072	0.580428	-7.13391	9.75545e-13	2.47282e-11
ENSG00000126814	TRMT5	1186.25	-1.98125	0.277721	-7.13398	9.75041e-13	2.47282e-11
ENSG00000197756	RPL37A	38181.5	-1.73623	0.243398	-7.13328	9.80033e-13	2.48282e-11
ENSG00000200156	RNU5B-1	6.83368	-7.12559	0.999061	-7.13228	9.87175e-13	2.49953e-11
ENSG00000123472		2180.52	-1.89164	0.265267	-7.13107	9.95925e-13	2.52029e-11
ENSG00000155957	TMBIM4	5226.32	-1.80464	0.253124	-7.12947	1.00757e-12	2.54837e-11
ENSG00000236111		131.067	-5.61232	0.787245	-7.12906	1.01055e-12	2.55448e-11
ENSG00000189332	SLC25A51P4	5.96372	-6.06093	0.850306	-7.12794	1.01879e-12	2.57389e-11
ENSG00000242060	RPS3AP49	405.042	-5.23666	0.734681	-7.1278	1.01986e-12	2.57517e-11
ENSG00000207972	MIR638	0.738795	-4.00268	0.56175	-7.12538	1.03793e-12	2.61935e-11
ENSG00000259592	PRELID1P4	24.1256	-4.96436	0.696725	-7.12528	1.03871e-12	2.61989e-11
ENSG00000260615	RPL23AP97	14.5643	-3.20684	0.450138	-7.12412	1.04745e-12	2.64047e-11
ENSG00000261652	C15orf65	113.244	-1.90225	0.26703	-7.12372	1.05055e-12	2.64682e-11
ENSG00000260339	HEXA-AS1	52.1009	-2.62728	0.36883	-7.12328	1.05388e-12	2.65376e-11
ENSG00000267312		80.927	-3.22218	0.452351	-7.12319	1.05459e-12	2.65409e-11
ENSG00000214087	ARL16	919.259	-1.81321	0.254583	-7.12226	1.06171e-12	2.67055e-11
ENSG00000213593	TMX2	3802.52	-1.6695	0.234411	-7.12211	1.06287e-12	2.67162e-11
ENSG00000224594	RPL29P19	33.1778	-5.01025	0.703484	-7.12205	1.06331e-12	2.67162e-11
ENSG00000240429	LRRFIP1P1	150.515	-3.67535	0.516072	-7.12178	1.06544e-12	2.67404e-11
ENSG00000273314		199.35	-1.83183	0.257214	-7.1218	1.06526e-12	2.67404e-11
ENSG00000253146	CIR1P1	23.5686	-3.05159	0.428494	-7.12167	1.06629e-12	2.67472e-11
ENSG00000178096		463.162	-2.16	0.303309	-7.12147	1.06786e-12	2.67682e-11
ENSG00000114023	FAM162A	3265.44	-1.49768	0.210307	-7.12141	1.0683e-12	2.67682e-11
ENSG00000277184	SNORA9	2.17047	-3.78232	0.531143	-7.12109	1.07073e-12	2.68146e-11
ENSG00000214195	HMGN2P31	11.7803	-7.10617	0.998047	-7.12008	1.07867e-12	2.69985e-11
ENSG00000213261	EEF1B2P6	632.866	-3.25231	0.456825	-7.11939	1.08408e-12	2.71193e-11
ENSG00000135821	GLUL	30984.9	-2.22719	0.312847	-7.1191	1.08632e-12	2.71603e-11
ENSG00000274845		4.44872	-3.94586	0.554276	-7.11894	1.08761e-12	2.71777e-11
ENSG00000232119	MCTS1	1674.73	-1.27808	0.179567	-7.11754	1.09868e-12	2.74394e-11
ENSG00000113303	BTNL8	20.8478	-3.69859	0.519698	-7.11682	1.10448e-12	2.75693e-11
ENSG00000270878	GCATP1	25.3091	-3.3637	0.472702	-7.11591	1.11177e-12	2.7736e-11
ENSG00000173218	VANGL1	1059.39	-2.85062	0.400617	-7.11557	1.11452e-12	2.77895e-11
ENSG00000102109	PCSK1N	1531.87	4.90143	0.688839	7.11549	1.11515e-12	2.779e-11
ENSG00000218459	RPS27P15	20.7369	-7.18754	1.01026	-7.11458	1.12253e-12	2.79589e-11
ENSG00000107130	NCS1	3155.07	-2.18202	0.306719	-7.11407	1.12669e-12	2.80472e-11
ENSG00000100823	APEX1	3028.67	-2.45706	0.345506	-7.1115	1.14791e-12	2.856e-11
ENSG00000248971	KRT8P46	35.3676	-4.25358	0.598148	-7.11126	1.14988e-12	2.85934e-11
ENSG00000119138	KLF9	4391.86	-2.26958	0.319184	-7.11057	1.15569e-12	2.87222e-11
ENSG00000103121	CMC2	821.582	-1.69102	0.23783	-7.11021	1.15867e-12	2.87809e-11
STRG.20828		18.3492	17.4732	2.45758	7.10992	1.16112e-12	2.88259e-11
ENSG00000220848	RPS18P9	938.823	-3.95254	0.555979	-7.10916	1.16754e-12	2.89696e-11
ENSG00000180284	CNEP1R1P1	6.08691	-4.20465	0.591505	-7.10839	1.17403e-12	2.91149e-11
ENSG00000221983	UBA52	17669.1	-1.48868	0.209442	-7.10783	1.17882e-12	2.92179e-11
ENSG00000161981	SNRNP25	1322.7	-1.43124	0.20137	-7.1075	1.18165e-12	2.92722e-11
ENSG00000140264	SERF2	17291.6	-1.70146	0.239397	-7.10729	1.18341e-12	2.93e-11
ENSG00000256896	PSMC1P8	3.16941	-6.59537	0.928071	-7.10653	1.18997e-12	2.94464e-11
ENSG00000221116	SNORD11	2.18512	-4.00933	0.56425	-7.10559	1.1981e-12	2.96315e-11
ENSG00000214820	MPRIPP1	51.8369	-3.22078	0.453391	-7.10374	1.21423e-12	3.00143e-11
ENSG00000180822	PSMG4	812.129	-1.82518	0.256941	-7.1035	1.2164e-12	3.00519e-11
ENSG00000214114	MYCBP	1618.42	-1.861	0.261992	-7.10326	1.21851e-12	3.00876e-11
ENSG00000270166		5.46406	-7.85998	1.10678	-7.1017	1.23231e-12	3.04121e-11
ENSG00000147684	NDUFB9	5719.05	-1.51881	0.213895	-7.10074	1.24094e-12	3.06086e-11
ENSG00000181991	MRPS11	1589.6	-1.3941	0.196349	-7.10013	1.24639e-12	3.07264e-11
ENSG00000054116		3634.29	-1.82269	0.256716	-7.10003	1.24727e-12	3.07315e-11
ENSG00000123349	PFDN5	15509.6	-1.59636	0.224853	-7.09957	1.25147e-12	3.08185e-11
ENSG00000123179	EBPL	625.65	-2.30903	0.325278	-7.09865	1.25978e-12	3.10065e-11
ENSG00000117395	EBNA1BP2	2555.49	-1.5298	0.215547	-7.09728	1.27239e-12	3.12999e-11
ENSG00000207383	Y_RNA	18.4525	-2.63606	0.371477	-7.09615	1.28278e-12	3.15386e-11
ENSG00000284378	MIR1244-1	2647.02	6.88498	0.970252	7.09607	1.28354e-12	3.15404e-11
ENSG00000213667	PGGT1BP1	13.7005	-3.6107	0.508836	-7.096	1.28423e-12	3.15405e-11
ENSG00000173409	ARV1	1400.58	-1.4886	0.209832	-7.09426	1.30044e-12	3.19214e-11
ENSG00000225018		6.95462	-6.59162	0.929201	-7.09386	1.3042e-12	3.19964e-11
ENSG00000213222	TOMM4P4	57.1966	-2.71395	0.382608	-7.0933	1.30951e-12	3.21097e-11
ENSG00000197111	PCBP2	24499.2	-1.58288	0.223167	-7.09279	1.3143e-12	3.22099e-11
ENSG00000226950	DANCR	2021.03	-2.0843	0.293902	-7.09181	1.32369e-12	3.2388e-11
ENSG00000283881	MIR3916	2.62128	-4.0385	0.569449	-7.09195	1.32236e-12	3.2388e-11
ENSG00000284055	MIR4315-1	2.22667	-3.74547	0.528139	-7.09182	1.32362e-12	3.2388e-11
ENSG00000215482	CALM2P3	198.704	-5.10075	0.719408	-7.09021	1.3391e-12	3.27476e-11
ENSG00000274494	MIR6832	2.2342	-4.05047	0.571319	-7.08969	1.34416e-12	3.28536e-11
ENSG00000234785	EEF1GP5	250.763	-5.16673	0.728949	-7.08792	1.36145e-12	3.32585e-11
ENSG00000244479	OR2A1-AS1	161.009	-2.73033	0.385214	-7.08782	1.36237e-12	3.32633e-11
ENSG00000230199		51.8247	-5.23971	0.73931	-7.08729	1.36761e-12	3.33203e-11
ENSG00000255141	HNRNPA1P76	8.29189	-6.24687	0.881412	-7.08735	1.36707e-12	3.33203e-11
ENSG00000124356		1711.03	-1.99028	0.280821	-7.08736	1.36691e-12	3.33203e-11
ENSG00000270533		10.2806	-3.0675	0.432807	-7.08744	1.36616e-12	3.33203e-11
ENSG00000260602	HMGN2P4	23.3593	-6.16516	0.86992	-7.08705	1.37005e-12	3.33619e-11
ENSG00000272902	TBC1D8-AS1	82.1497	-2.69392	0.380141	-7.08662	1.37424e-12	3.34462e-11
ENSG00000225094	SETP2	59.4208	-4.70625	0.664125	-7.08639	1.37657e-12	3.3485e-11
ENSG00000259706	HSP9B2P	1408.11	-4.15984	0.587027	-7.08628	1.37761e-12	3.34925e-11
ENSG00000129460	NGDN	1152.84	-1.86887	0.263745	-7.08587	1.38172e-12	3.35746e-11
ENSG00000250073		210.484	-2.38775	0.336982	-7.08568	1.3836e-12	3.36026e-11
ENSG00000110700	RPS13	19566.9	-1.68031	0.237167	-7.08491	1.3913e-12	3.37717e-11
ENSG00000181191	PJA1	2685.7	-1.78467	0.251917	-7.08436	1.3969e-12	3.38895e-11
ENSG00000100246	DNAL4	1661.87	-1.46624	0.207014	-7.08282	1.41252e-12	3.42504e-11
ENSG00000124641	MED2	1071.03	-1.67836	0.237011	-7.08137	1.42736e-12	3.45774e-11
ENSG00000225580	PA2G4P5	83.7392	-3.61568	0.510591	-7.08136	1.42751e-12	3.45774e-11
ENSG00000131508	UBE2D2	5518.85	-1.4162	0.199995	-7.08119	1.4292e-12	3.46001e-11
ENSG00000166595	CIAO2B	2495.69	-1.39562	0.197113	-7.08034	1.43804e-12	3.47956e-11
ENSG00000213721	HMGN2P3	8.41557	-6.81966	0.963244	-7.07989	1.44271e-12	3.48901e-11
ENSG00000202538	RNU4-2	46.1359	-5.08293	0.718012	-7.07917	1.45021e-12	3.5053e-11
ENSG00000250834	KRT18P54	1.99262	-5.68902	0.803962	-7.07623	1.48134e-12	3.57864e-11
ENSG00000232508		2.93745	-6.82134	0.964013	-7.07598	1.48398e-12	3.58314e-11
ENSG00000254185	MAPK6P5	29.3245	-4.11277	0.581238	-7.07588	1.485e-12	3.58321e-11
ENSG00000062194	GPBP1	5980.99	-1.96075	0.277105	-7.07583	1.48557e-12	3.58321e-11
ENSG00000160993	ALKBH4	895.541	-1.42468	0.201352	-7.07556	1.48846e-12	3.58829e-11
ENSG00000262904	TMPOP2	10.2574	-3.6366	0.514056	-7.07433	1.50177e-12	3.61847e-11
ENSG00000270021		70.6778	-2.46914	0.349076	-7.07334	1.51247e-12	3.64043e-11
ENSG00000272323	TTC23L-AS1	223.65	-1.8837	0.26631	-7.07336	1.51224e-12	3.64043e-11
ENSG00000102760	RGCC	3627.12	-2.35613	0.333159	-7.0721	1.52609e-12	3.67126e-11
ENSG00000206990	Y_RNA	3.86129	-3.9103	0.553062	-7.07028	1.54624e-12	3.71779e-11
ENSG00000174007	CEP19	220.863	-2.07322	0.293246	-7.06991	1.55029e-12	3.72558e-11
ENSG00000144674	GOLGA4	5582.42	-2.0998	0.297026	-7.06943	1.55566e-12	3.73652e-11
ENSG00000284054	MIR7112	2.32666	-3.88999	0.550358	-7.06812	1.57049e-12	3.77017e-11
ENSG00000116212	LRRC42	1353.37	-1.91015	0.270253	-7.06801	1.57177e-12	3.77125e-11
ENSG00000231206	HNRNPA1P25	26.2779	-6.19118	0.876042	-7.06721	1.58075e-12	3.79082e-11
ENSG00000229840	ISCA1P2	6.76107	-6.11702	0.865566	-7.06707	1.58241e-12	3.79282e-11
ENSG00000261189		97.8567	-2.26306	0.32025	-7.06653	1.58857e-12	3.8056e-11
ENSG00000226124	FTCDNL1	271.848	-2.5217	0.356892	-7.06572	1.59785e-12	3.82581e-11
ENSG00000219529		139.079	-4.02342	0.569495	-7.06489	1.60746e-12	3.84681e-11
ENSG00000185839		459.469	-3.19644	0.452457	-7.06462	1.61052e-12	3.85212e-11
ENSG00000180787	ZFP3	1040.81	-1.91577	0.271184	-7.06446	1.61245e-12	3.85473e-11
ENSG00000110442	COMMD9	1387.56	-1.67656	0.237337	-7.06405	1.61717e-12	3.86401e-11
ENSG00000099785	MARCHF2	2015.36	-1.48328	0.210027	-7.06234	1.63718e-12	3.90977e-11
ENSG00000174173	TRMT1C	1188.25	-1.61639	0.22888	-7.06218	1.63906e-12	3.91223e-11
ENSG00000230355		4.54846	-6.10267	0.864183	-7.06178	1.64387e-12	3.92166e-11
ENSG00000144867	SRPRB	2518.14	-1.40912	0.199587	-7.06015	1.66328e-12	3.96589e-11
ENSG00000105176	URI1	4382.8	-1.69264	0.239764	-7.05964	1.6694e-12	3.97842e-11
ENSG00000272220		4.71951	-3.54826	0.502658	-7.05899	1.67714e-12	3.99477e-11
ENSG00000101558	VAPA	9781.45	-1.64814	0.23352	-7.0578	1.69158e-12	4.02709e-11
ENSG00000142676	RPL11	43471.6	-1.73707	0.246135	-7.05741	1.69636e-12	4.03637e-11
ENSG00000175886	RPL7AP66	1666.35	-3.07667	0.435953	-7.05734	1.69724e-12	4.03638e-11
ENSG00000178982	EIF3K	3030.07	-1.45687	0.20644	-7.05712	1.69985e-12	4.04049e-11
ENSG00000249101		5.49741	-7.12657	1.00991	-7.05663	1.70586e-12	4.05267e-11
ENSG00000171612	SLC25A33	524.187	-1.90871	0.270544	-7.0551	1.72477e-12	4.09545e-11
ENSG00000120727	PAIP2	5153.8	-1.81851	0.257775	-7.05463	1.73056e-12	4.10708e-11
ENSG00000279086		27.8914	-2.86744	0.406503	-7.05392	1.73941e-12	4.12594e-11
ENSG00000140022	STON2	1159.02	-2.75586	0.390697	-7.0537	1.74218e-12	4.13037e-11
ENSG00000274427		17.1381	-3.59627	0.50986	-7.05345	1.74539e-12	4.13583e-11
ENSG00000164051	CCDC51	672.472	-1.59255	0.225793	-7.05315	1.74917e-12	4.14266e-11
ENSG00000201098	RNY1	5.79667	-6.34298	0.899402	-7.05244	1.75806e-12	4.16157e-11
ENSG00000237285	HNRNPA1P2	2.02283	-4.1467	0.587989	-7.05234	1.7593e-12	4.16234e-11
ENSG00000256211	SKP1P2	199.697	-3.70209	0.524989	-7.05176	1.7667e-12	4.17769e-11
ENSG00000244313		5176.99	-2.78149	0.394531	-7.05012	1.78766e-12	4.22507e-11
ENSG00000140395	WDR61	3095.24	-1.83104	0.259731	-7.04975	1.79233e-12	4.23393e-11
ENSG00000166295	ANAPC16	7761.74	-1.52057	0.215698	-7.04957	1.79472e-12	4.23739e-11
ENSG00000257954		10.5363	-4.6708	0.662588	-7.04932	1.7979e-12	4.2427e-11
ENSG00000105186	ANKRD27	2061.59	-1.90797	0.270677	-7.04889	1.80346e-12	4.25364e-11
ENSG00000075790	BCAP29	1995.69	-2.123	0.301213	-7.04816	1.81294e-12	4.27379e-11
ENSG00000256356	HSPA8P5	289.544	-4.77498	0.677657	-7.04631	1.8373e-12	4.329e-11
ENSG00000267480		24.2669	-3.00479	0.426572	-7.04403	1.86761e-12	4.39816e-11
ENSG00000234709	UPF3AP3	26.1387	-2.93838	0.417171	-7.04359	1.87343e-12	4.40732e-11
ENSG00000253676	TAGLN2P1	329.162	-3.3412	0.474359	-7.04361	1.87326e-12	4.40732e-11
ENSG00000171861	MRM3	714.836	-1.35697	0.192678	-7.04268	1.88581e-12	4.43418e-11
ENSG00000255504		6.86623	-4.38903	0.623243	-7.04225	1.8916e-12	4.44549e-11
ENSG00000236124	HMGN2P23	12.2544	-6.84683	0.972462	-7.04071	1.91257e-12	4.49248e-11
ENSG00000112304	ACOT13	1813.93	-1.66796	0.236907	-7.04056	1.91466e-12	4.49509e-11
ENSG00000215093	EEF1A1P29	645.485	-5.69187	0.808489	-7.04013	1.92067e-12	4.50644e-11
ENSG00000265574	WDR45BP1	69.4309	-3.92263	0.557186	-7.04007	1.92146e-12	4.50644e-11
ENSG00000261582		13.1589	-4.19031	0.595233	-7.03978	1.92545e-12	4.51347e-11
ENSG00000224688	E2F6P2	20.048	-2.56724	0.364688	-7.03954	1.92872e-12	4.51883e-11
ENSG00000100294	MCAT	754.58	-1.37826	0.195811	-7.03874	1.93982e-12	4.54252e-11
ENSG00000226340	USP8P2	7.6377	-3.97114	0.564211	-7.0384	1.94464e-12	4.55148e-11
ENSG00000234322	ST13P18	250.845	-3.42586	0.486749	-7.03826	1.9465e-12	4.55349e-11
ENSG00000071994	PDCD2	2237.13	-1.62776	0.231349	-7.03597	1.97877e-12	4.62662e-11
ENSG00000149100	EIF3M	6193.55	-1.52892	0.217305	-7.03581	1.98111e-12	4.62973e-11
ENSG00000213309	RPL9P18	332.611	-4.9517	0.703842	-7.03525	1.98911e-12	4.64531e-11
ENSG00000125817	CENPB	4990.43	-1.23676	0.175796	-7.0352	1.9898e-12	4.64531e-11
ENSG00000237442	HNRNPA1P57	17.6465	-5.61728	0.798482	-7.03495	1.99331e-12	4.65113e-11
ENSG00000136436	CALCOCO2	4597.35	-2.13514	0.303545	-7.034	2.0069e-12	4.68044e-11
ENSG00000236679	RPL23AP24	59.7107	-2.6303	0.373961	-7.03362	2.01246e-12	4.69102e-11
ENSG00000284172	MIR4315-2	2.24514	-3.7363	0.531235	-7.03324	2.01795e-12	4.70144e-11
ENSG00000166337	TAF1	4820.66	-1.65113	0.234788	-7.03243	2.02966e-12	4.72631e-11
ENSG00000213028		6.01375	-6.27488	0.892293	-7.03231	2.03138e-12	4.72791e-11
ENSG00000172922	RNASEH2C	1762.05	-2.02861	0.288483	-7.032	2.03598e-12	4.73622e-11
ENSG00000114378	HYAL1	204.009	-2.23449	0.317807	-7.03095	2.05132e-12	4.76947e-11
ENSG00000278068		3.57552	-5.94551	0.84571	-7.0302	2.06242e-12	4.79285e-11
ENSG00000284152	MIR6758	2.36775	-3.91042	0.556238	-7.03012	2.06359e-12	4.79314e-11
ENSG00000152464	RPP38	770.761	-1.88897	0.268709	-7.02981	2.06816e-12	4.80132e-11
ENSG00000143319		1138.07	-1.84517	0.262494	-7.02939	2.07432e-12	4.81317e-11
ENSG00000250227	TRIM6P14	49.3685	-3.09693	0.440644	-7.02819	2.09224e-12	4.85229e-11
ENSG00000163898	LIPH	2378.34	5.96332	0.848563	7.02755	2.10191e-12	4.87227e-11
ENSG00000229659	RPL26P6	230.078	-5.08509	0.723603	-7.02745	2.10339e-12	4.87323e-11
ENSG00000169035	KLK7	1133.82	8.54727	1.21641	7.02661	2.11613e-12	4.90027e-11
ENSG00000255836		60.6349	-3.83486	0.545834	-7.02568	2.1303e-12	4.93058e-11
ENSG00000175606	TMEM7	814.113	-1.58693	0.225979	-7.02248	2.17971e-12	5.0424e-11
ENSG00000236152	MRPS36P1	123.295	-3.16329	0.450462	-7.02232	2.18212e-12	5.04542e-11
ENSG00000251667	BRCC3P1	28.1559	-3.01547	0.429462	-7.02149	2.19508e-12	5.07284e-11
ENSG00000274033		2.97269	-5.8644	0.835218	-7.0214	2.19656e-12	5.07368e-11
ENSG00000141437	SLC25A52	12.3367	-3.25874	0.464131	-7.02116	2.2003e-12	5.07978e-11
ENSG00000189369	GSPT2	858.561	-1.86081	0.265035	-7.02099	2.20306e-12	5.08358e-11
ENSG00000145982	FARS2	938.312	-1.62569	0.23155	-7.02087	2.20485e-12	5.08514e-11
ENSG00000279880		38.6778	-3.64624	0.519394	-7.02018	2.21578e-12	5.10778e-11
ENSG00000270558		62.7039	-2.72999	0.388894	-7.01987	2.22075e-12	5.11666e-11
ENSG00000253228	NRBF2P4	16.3923	-4.32027	0.61546	-7.01958	2.22537e-12	5.12473e-11
ENSG00000224207		3.44373	-5.22823	0.744847	-7.0192	2.23138e-12	5.136e-11
ENSG00000275072	SNORD5B	2.68927	-4.01892	0.572568	-7.01912	2.23277e-12	5.1366e-11
ENSG00000245937	LINC1184	1353.46	-1.68482	0.240038	-7.01897	2.23509e-12	5.13936e-11
ENSG00000198865	CCDC152	699.564	-4.26861	0.608317	-7.01708	2.26559e-12	5.20687e-11
[truncated: 56,413 more rows]
